# Supplementary material for: Effects of the electronic structure of five-membered N-heterocyclic carbenes on insertion of silanes and boranes into the NHC C–N bond
Source: Royal Society of Chemistry journal article supplement (doi:10.1039/c4dt03566f), 2015-01-01
Supplement: c4dt03566f1.pdf [file c4dt03566f1.pdf]

*Supporting Information for:*

Effects of the electronic structure of five-membered N-  
heterocyclic carbenes on insertion of silanes and  
boranes into the NHC C-N bond

*Kalon J. Iversen, David J. D. Wilson\* and Jason L. Dutton\**

[david.wilson@latrobe.edu.au](mailto:david.wilson@latrobe.edu.au), [j.dutton@latrobe.edu.au](mailto:j.dutton@latrobe.edu.au)

Department of Chemistry, La Trobe Institute for Molecular Sciences, La Trobe University,  
Melbourne, Victoria, Australia

## Table of Contents

|                                                                                                                                         |    |
|-----------------------------------------------------------------------------------------------------------------------------------------|----|
| Computational methods .....                                                                                                             | 3  |
| Cartesian coordinates of optimized geometries .....                                                                                     | 4  |
| NHC compounds <b>1-5</b> .....                                                                                                          | 4  |
| Reactant silane ( $\text{SiH}_2\text{PH}_2$ ) and boranes ( $\text{H}_2\text{BMe}_1$ , $\text{H}_1\text{BMe}_2$ , $\text{BMe}_3$ )..... | 5  |
| Insertion pathway compounds (A-D, T1-T3) .....                                                                                          | 6  |
| $\text{H}_2\text{SiPh}_2$ -NHC .....                                                                                                    | 6  |
| $\text{H}_2\text{BMe}$ -NHC .....                                                                                                       | 24 |
| $\text{H}_1\text{BMe}_2$ -NHC.....                                                                                                      | 35 |
| $\text{BMe}_3$ -NHC.....                                                                                                                | 49 |
| Activation barriers for T1, NBO charges for adduct A, and $^{31}\text{P}$ chemical shifts for NHC- $\text{PPh}_3$ adducts .....         | 63 |

## Computational methods

All theoretical calculations were performed using the Gaussian 09 program.<sup>1</sup> Geometry optimisations were carried out using the M06-2X density functional<sup>2</sup> and def2-TZVP basis set.<sup>3</sup> Frequency calculations, performed at the same theory level, indicated that all optimised structures were minima on the potential energy surface. Transition state optimisations used the quadratic synchronous transit (QST) method.<sup>4</sup> All transition states were also confirmed using intrinsic reaction coordinate (IRC)<sup>5</sup> analysis. Thermodynamic corrections for energy values were taken from these calculations (standard T = 298.15 K and p = 1 atm). Geometry optimisations were also performed using other density functionals (B3LYP<sup>6, 7</sup> and PBE<sup>8</sup>) and basis sets (6-31G(d)<sup>9, 10</sup> and def2-SVP<sup>11</sup>), all of which produced comparable geometries. Single-point energies were calculated at the M06-2X/def2-TZVP geometries, including MP2, SOS-MP2<sup>12</sup> and SCS-MP2<sup>13</sup> energies. All reported  $\Delta G$  values are SCS-MP2 energies with M06-2X/def2-TZVP thermochemical corrections. Molecular orbital (MO) analysis was carried out at the B3LYP/def2-TZVP level of theory at the M06-2X optimized geometries, as the results provided good agreement with previous studies. NBO analysis was carried out with NBO 5.9.<sup>14</sup>

## References

1. M. J. Frisch, G. W. Trucks, H. B. Schlegel, G. E. Scuseria, M. A. Robb, J. R. Cheeseman, G. Scalmani, V. Barone, B. Mennucci, G. A. Petersson, H. Nakatsuji, M. Caricato, X. Li, H. P. Hratchian, A. F. Izmaylov, J. Bloino, G. Zheng, J. L. Sonnenberg, M. Hada, M. Ehara, K. Toyota, R. Fukuda, J. Hasegawa, M. Ishida, T. Nakajima, Y. Honda, O. Kitao, H. Nakai, T. Vreven, J. J. A. Montgomery, J. E. Peralta, F. Ogliaro, M. Bearpark, J. J. Heyd, E. Brothers, K. N. Kudin, V. N. Staroverov, R. Kobayashi, J. Normand, K. Raghavachari, A. Rendell, J. C. Burant, S. S. Iyengar, J. Tomasi, M. Cossi, N. Rega, J. M. Millam, M. Klene, J. E. Knox, J. B. Cross, V. Bakken, C. Adamo, J. Jaramillo, R. Gomperts, R. E. Stratmann, O. Yazyev, A. J. Austin, R. Cammi, C. Pomelli, J. W. Ochterski, R. L. Martin, K. Morokuma, V. G. Zakrzewski, G. A. Voth, P. Salvador, J. J. Dannenberg, S. Dapprich, A. D. Daniels, Ö. Farkas, J. B. Foresman, J. V. Ortiz, J. Cioslowski and D. J. Fox, Gaussian, Inc., Wallingford CT, Revision D.1, 2009.
2. Y. Zhao and D. G. Truhlar, *Theor Chem Account*, 2008, **120**, 215-241.
3. A. Schäfer, C. Huber and R. Ahlrichs, *J. Chem. Physics*, 1994, **100**, 5829-5835.
4. C. Peng, P. Y. Ayala, H. B. Schlegel and M. J. Frisch, *J. Comput. Chem.*, 1996, **17**, 49-56.
5. K. Fukui, *Account. Chem. Research.*, 1981, **14**, 363-368.
6. A. D. Becke, *Phys. Rev. A*, 1988, **38**, 3098-3100.
7. C. Lee, W. Yang and R. G. Parr, *Phys. Rev. B*, 1988, **37**, 785-789.
8. M. Ernzerhof and J. P. Perdew, *J. Chem. Phys.*, 1998, **109**, 3313-3320.
9. W. J. Hehre, R. Ditchfield and J. A. Pople, *J. Chem. Phys.*, 1972, **56**, 2257-2261.
10. P. C. Hariharan and J. A. Pople, *Theor. Chim. Acta*, 1973, **28**, 213-222.
11. A. Schäfer, H. Horn and R. Ahlrichs, *J. Chem. Phys.*, 1992, **97**, 2571-2577.
12. Y. Jung, R. C. Lochan, A. D. Dutoi and M. Head-Gordon, *J. Chem. Phys.*, 2004, **121**, 9793-9802.
13. S. Grimme, *J. Chem. Phys.*, 2003, **118**, 9095-9102.
14. E. D. Glendening, J. K. Badenhoop, A. E. Reed, J. E. Carpenter, J. A. Bohmann, C. M. Morales and F. Weinhold, NBO 5.9. see <http://www.chem.wisc.edu/~nbo5>, Theoretical Chemistry Institute, University of Wisconsin, Madison, WI2011.

**Cartesian coordinates for starting NHC  
compounds (compounds 1-5)**

NHC 1

$E_c = -304.776887622$  (Hartrees)  
M06-2X/def2-TZVP optimized geometry (Å).

|     |           |           |           |
|-----|-----------|-----------|-----------|
| 0 1 |           |           |           |
| C   | 0.000000  | 0.000000  | 0.978473  |
| N   | 0.000000  | 1.055682  | 0.122718  |
| C   | 0.000000  | 0.674418  | -1.204754 |
| C   | 0.000000  | -0.674418 | -1.204754 |
| N   | 0.000000  | -1.055682 | 0.122718  |
| C   | 0.000000  | -2.433262 | 0.565404  |
| C   | 0.000000  | 2.433262  | 0.565404  |
| H   | 0.000000  | -1.378756 | -2.018578 |
| H   | 0.000000  | 1.378756  | -2.018578 |
| H   | 0.888581  | -2.952470 | 0.204413  |
| H   | -0.888581 | 2.952470  | 0.204413  |
| H   | 0.000000  | -2.427104 | 1.651401  |
| H   | 0.000000  | 2.427104  | 1.651401  |
| H   | 0.888581  | 2.952470  | 0.204413  |
| H   | -0.888581 | -2.952470 | 0.204413  |

NHC 2

$E_c = -305.971903732$  (Hartrees)  
M06-2X/def2-TZVP optimized geometry (Å).

|     |           |           |           |
|-----|-----------|-----------|-----------|
| 0 1 |           |           |           |
| C   | 0.000000  | 0.000000  | 1.016364  |
| N   | 0.000000  | 1.068516  | 0.206579  |
| C   | -0.101795 | 0.757398  | -1.221955 |
| C   | 0.101795  | -0.757398 | -1.221955 |
| N   | 0.000000  | -1.068516 | 0.206579  |
| C   | 0.135978  | -2.428429 | 0.652805  |
| C   | -0.135978 | 2.428429  | 0.652805  |
| H   | 1.104440  | -2.845949 | 0.356759  |
| H   | -1.104440 | 2.845949  | 0.356759  |
| H   | 0.059160  | -2.439655 | 1.736723  |
| H   | -0.059160 | 2.439655  | 1.736723  |
| H   | 0.650717  | 3.057707  | 0.227387  |
| H   | -0.650717 | -3.057707 | 0.227387  |
| H   | 1.086350  | -1.047473 | -1.603688 |
| H   | -0.655529 | -1.292848 | -1.797433 |
| H   | 0.655529  | 1.292848  | -1.797433 |
| H   | -1.086350 | 1.047473  | -1.603688 |

NHC 3

$E_c = -383.402962226$  (Hartrees)  
M06-2X/def2-TZVP optimized geometry (Å).

|     |           |           |           |
|-----|-----------|-----------|-----------|
| 0 1 |           |           |           |
| C   | -0.000029 | 1.563271  | -0.000006 |
| N   | -1.053499 | 0.707316  | 0.000037  |
| C   | -0.676758 | -0.630651 | 0.000024  |
| C   | 0.676785  | -0.630618 | -0.000005 |
| N   | 1.053470  | 0.707350  | -0.000057 |
| C   | 2.428313  | 1.152610  | 0.000032  |
| C   | -2.428340 | 1.152583  | -0.000023 |
| H   | 2.954082  | 0.795580  | -0.887291 |
| H   | -2.954028 | 0.795796  | 0.887449  |
| H   | 2.416970  | 2.238675  | 0.000039  |
| H   | -2.416981 | 2.238648  | -0.000292 |
| H   | -2.954070 | 0.795336  | -0.887279 |
| H   | 2.953951  | 0.795577  | 0.887432  |
| C   | -1.660622 | -1.745664 | 0.000018  |
| H   | -1.144719 | -2.704296 | 0.000115  |
| H   | -2.305288 | -1.712274 | 0.881286  |
| H   | -2.305148 | -1.712369 | -0.881354 |
| C   | 1.660672  | -1.745622 | -0.000021 |
| H   | 2.305403  | -1.712162 | 0.881196  |
| H   | 1.144770  | -2.704255 | 0.000168  |
| H   | 2.305136  | -1.712374 | -0.881444 |

NHC 4

$E_c = -1223.97598149$  (Hartrees)  
M06-2X/def2-TZVP optimized geometry (Å).

|     |           |           |           |
|-----|-----------|-----------|-----------|
| 0 1 |           |           |           |
| C   | 0.000000  | 0.000000  | 1.939465  |
| N   | 0.000000  | 1.062347  | 1.089843  |
| C   | 0.000000  | 0.675208  | -0.233169 |
| C   | 0.000000  | -0.675208 | -0.233169 |
| N   | 0.000000  | -1.062347 | 1.089843  |
| C   | 0.000000  | -2.441162 | 1.534031  |
| C   | 0.000000  | 2.441162  | 1.534031  |
| H   | 0.887755  | -2.959096 | 1.171413  |
| H   | -0.887755 | 2.959096  | 1.171413  |
| H   | 0.000000  | -2.421003 | 2.619552  |
| H   | 0.000000  | 2.421003  | 2.619552  |
| H   | 0.887755  | 2.959096  | 1.171413  |
| H   | -0.887755 | -2.959096 | 1.171413  |
| Cl  | 0.000000  | -1.755806 | -1.542050 |
| Cl  | 0.000000  | 1.755806  | -1.542050 |

NHC 5

$E_c = -458.423106664$  (Hartrees)

M06-2X/def2-TZVP optimized geometry (Å).

0 1

|   |           |           |           |
|---|-----------|-----------|-----------|
| C | 2.011259  | 0.000227  | 0.000005  |
| N | 1.168475  | 1.068800  | 0.000071  |
| N | 1.168772  | -1.068551 | 0.000069  |
| C | 1.614764  | -2.442189 | -0.000115 |
| C | 1.614134  | 2.442522  | -0.000093 |
| H | 1.251879  | -2.962236 | -0.888520 |
| H | 1.251134  | 2.962707  | 0.888169  |
| H | 2.700795  | -2.435760 | -0.000169 |
| H | 2.700163  | 2.436298  | -0.000114 |
| H | 1.251179  | 2.962509  | -0.888507 |
| H | 1.251893  | -2.962448 | 0.888153  |
| C | -1.347841 | -1.422152 | 0.000126  |
| C | -2.532670 | -0.698959 | -0.000092 |
| C | -2.532849 | 0.698424  | -0.000107 |
| C | -1.348193 | 1.421867  | 0.000094  |
| C | -0.165772 | 0.697535  | 0.000106  |
| C | -0.165587 | -0.697571 | 0.000119  |
| H | -1.348709 | -2.504261 | 0.000163  |
| H | -3.476473 | -1.227741 | -0.000253 |
| H | -3.476782 | 1.226978  | -0.000277 |
| H | -1.349268 | 2.503979  | 0.000116  |

**Cartesian coordinates for reactant silane and boranes**

$H_2SiPh_2$

$E_c = -753.950242086$  (Hartrees)

M06-2X/def2-TZVP optimized geometry (Å).

0 1

|    |           |           |           |
|----|-----------|-----------|-----------|
| Si | 0.000000  | 0.000000  | 1.548782  |
| H  | -1.167494 | 0.267033  | 2.420418  |
| H  | 1.167494  | -0.267033 | 2.420418  |
| C  | 0.267002  | 1.516048  | 0.487584  |
| C  | 0.970985  | 1.447628  | -0.717794 |
| C  | -0.217171 | 2.760249  | 0.897290  |
| C  | 1.187966  | 2.583596  | -1.484237 |
| H  | 1.348331  | 0.492275  | -1.067403 |
| C  | 0.000000  | 3.900766  | 0.136606  |
| H  | -0.776449 | 2.840707  | 1.823149  |
| C  | 0.703770  | 3.812770  | -1.056178 |
| H  | 1.734122  | 2.511313  | -2.416294 |
| H  | -0.382818 | 4.856280  | 0.472204  |
| H  | 0.873129  | 4.700004  | -1.653175 |
| C  | -0.267002 | -1.516048 | 0.487584  |
| C  | -0.970985 | -1.447628 | -0.717794 |
| C  | 0.217171  | -2.760249 | 0.897290  |
| C  | -1.187966 | -2.583596 | -1.484237 |
| H  | -1.348331 | -0.492275 | -1.067403 |
| C  | 0.000000  | -3.900766 | 0.136606  |
| H  | 0.776449  | -2.840707 | 1.823149  |
| C  | -0.703770 | -3.812770 | -1.056178 |
| H  | -1.734122 | -2.511313 | -2.416294 |
| H  | 0.382818  | -4.856280 | 0.472204  |
| H  | -0.873129 | -4.700004 | -1.653175 |

$H_2BMe$

$E_c = -65.9220657636$  (Hartrees)

M06-2X/def2-TZVP optimized geometry (Å).

0 1

|   |           |           |           |
|---|-----------|-----------|-----------|
| B | -0.871069 | -0.000011 | -0.021386 |
| H | -1.481158 | -1.023097 | 0.008701  |
| H | -1.481038 | 1.023160  | 0.008746  |
| C | 0.682092  | 0.000000  | -0.016223 |
| H | 0.939623  | -0.000023 | 1.055810  |
| H | 1.142719  | -0.894210 | -0.434484 |
| H | 1.142644  | 0.894225  | -0.434502 |

H<sub>1</sub>BMe<sub>2</sub>

E<sub>c</sub> = -105.248599578 (Hartrees)

M06-2X/def2-TZVP optimized geometry (Å).

0 1

|   |           |           |           |
|---|-----------|-----------|-----------|
| B | 0.000004  | 0.559534  | -0.000034 |
| H | -0.000049 | 1.755454  | 0.000024  |
| C | 1.368076  | -0.192888 | -0.013273 |
| H | 1.699356  | -0.206848 | 1.035999  |
| H | 1.308854  | -1.233737 | -0.334321 |
| H | 2.157067  | 0.321346  | -0.562785 |
| C | -1.368051 | -0.192926 | 0.013257  |
| H | -2.156636 | 0.320919  | 0.563731  |
| H | -1.700041 | -0.205883 | -1.035794 |
| H | -1.308719 | -1.234038 | 0.333416  |

BMe<sub>3</sub>

E<sub>c</sub> = -144.573890433 (Hartrees)

M06-2X/def2-TZVP optimized geometry (Å).

0 1

|   |           |           |           |
|---|-----------|-----------|-----------|
| B | -0.001526 | 0.005872  | -0.021205 |
| C | 1.295824  | 0.891022  | -0.010571 |
| H | 1.592950  | 0.990451  | 1.042700  |
| H | 2.142663  | 0.415090  | -0.509457 |
| H | 1.165982  | 1.901461  | -0.398755 |
| C | 0.128575  | -1.558504 | 0.012099  |
| H | -0.703224 | -2.061008 | 0.508995  |
| H | 0.094005  | -1.884038 | -1.037389 |
| H | 1.073101  | -1.924990 | 0.416899  |
| C | -1.425247 | 0.668943  | -0.011142 |
| H | -1.653878 | 0.885433  | 1.041980  |
| H | -1.476234 | 1.624840  | -0.534331 |
| H | -2.222647 | 0.014639  | -0.366939 |

**Cartesian coordinates for optimized insertion  
pathway compounds H<sub>2</sub>SiPh<sub>2</sub>-NHC 1**

H<sub>2</sub>SiPh<sub>2</sub>-NHC 1, A

E<sub>c</sub> = -1058.72615285 (Hartrees)

M06-2X/def2-TZVP optimized geometry (Å).

0 1

|    |           |           |           |
|----|-----------|-----------|-----------|
| Si | 0.089850  | -0.213159 | -0.024862 |
| C  | 1.894429  | -0.861709 | -0.132605 |
| C  | 2.621662  | -1.166018 | 1.020094  |
| C  | 2.524662  | -1.048728 | -1.363372 |
| C  | 3.924408  | -1.641931 | 0.951191  |
| H  | 2.148427  | -1.026153 | 1.987522  |
| C  | 3.830499  | -1.516384 | -1.445770 |
| H  | 1.973672  | -0.824564 | -2.270824 |
| C  | 4.532740  | -1.815295 | -0.285890 |
| H  | 4.466345  | -1.881143 | 1.858320  |
| H  | 4.300182  | -1.651550 | -2.412729 |
| H  | 5.549283  | -2.184413 | -0.345208 |
| C  | -1.544667 | -1.198639 | 0.155308  |
| C  | -2.149598 | -1.805097 | -0.947303 |
| C  | -2.183236 | -1.319079 | 1.390187  |
| C  | -3.342003 | -2.506099 | -0.826845 |
| H  | -1.669387 | -1.723404 | -1.917956 |
| C  | -3.384284 | -2.005897 | 1.521729  |
| H  | -1.721890 | -0.868210 | 2.262780  |
| C  | -3.965342 | -2.602965 | 0.411140  |
| H  | -3.786941 | -2.977850 | -1.694747 |
| H  | -3.864212 | -2.082772 | 2.490057  |
| H  | -4.898094 | -3.144636 | 0.509718  |
| C  | -0.219610 | 1.746353  | -0.077460 |
| C  | -0.056271 | 3.936947  | 0.341157  |
| C  | -1.148022 | 3.749686  | -0.434273 |
| H  | 0.376208  | 4.833767  | 0.747132  |
| H  | -1.863153 | 4.448950  | -0.829266 |
| N  | 0.496264  | 2.695066  | 0.549091  |
| N  | -1.224214 | 2.399472  | -0.684813 |
| C  | -2.280917 | 1.749011  | -1.448447 |
| H  | -3.054783 | 1.378330  | -0.777749 |
| H  | -2.701573 | 2.471265  | -2.144241 |
| H  | -1.848749 | 0.911323  | -1.990690 |
| C  | 1.672061  | 2.433217  | 1.368587  |
| H  | 2.264014  | 3.344003  | 1.422520  |
| H  | 1.366980  | 2.119040  | 2.365078  |
| H  | 2.259867  | 1.639458  | 0.913601  |
| H  | -0.033830 | -0.197153 | -1.580561 |
| H  | 0.216311  | -0.026067 | 1.520806  |

H<sub>2</sub>SiPh<sub>2</sub>-NHC 1, T1E<sub>c</sub> = -1058.70420902 (Hartrees)

M06-2X/def2-TZVP optimized geometry (Å).

|     |           |           |           |
|-----|-----------|-----------|-----------|
| 0 1 |           |           |           |
| Si  | 0.000014  | -0.065590 | 0.646516  |
| C   | 1.598066  | -0.951416 | 0.189932  |
| C   | 2.431794  | -1.396913 | 1.218103  |
| C   | 1.968060  | -1.245386 | -1.124645 |
| C   | 3.608075  | -2.084778 | 0.946814  |
| H   | 2.157414  | -1.199076 | 2.248819  |
| C   | 3.134573  | -1.943352 | -1.402927 |
| H   | 1.337353  | -0.909076 | -1.939470 |
| C   | 3.961579  | -2.358190 | -0.366535 |
| H   | 4.245155  | -2.409923 | 1.759902  |
| H   | 3.400016  | -2.164999 | -2.429289 |
| H   | 4.874814  | -2.898255 | -0.583074 |
| C   | -1.598098 | -0.951341 | 0.190002  |
| C   | -1.968323 | -1.245113 | -1.124558 |
| C   | -2.431666 | -1.396973 | 1.218245  |
| C   | -3.134899 | -1.943010 | -1.402743 |
| H   | -1.337744 | -0.908697 | -1.939440 |
| C   | -3.608006 | -2.084777 | 0.947055  |
| H   | -2.157109 | -1.199289 | 2.248942  |
| C   | -3.961738 | -2.357988 | -0.366272 |
| H   | -3.400526 | -2.164493 | -2.429093 |
| H   | -4.244956 | -2.410021 | 1.760205  |
| H   | -4.875022 | -2.898000 | -0.582737 |
| C   | 0.000035  | 1.770386  | 0.291400  |
| C   | 0.670381  | 3.800253  | -0.413060 |
| C   | -0.670161 | 3.800274  | -0.413139 |
| H   | 1.372001  | 4.565368  | -0.693713 |
| H   | -1.371720 | 4.565407  | -0.693892 |
| N   | 1.089510  | 2.599849  | 0.148184  |
| N   | -1.089401 | 2.599892  | 0.148084  |
| C   | -2.447150 | 2.125529  | 0.048896  |
| H   | -2.689717 | 1.487809  | 0.896577  |
| H   | -3.115792 | 2.984056  | 0.045763  |
| H   | -2.582868 | 1.548062  | -0.872032 |
| C   | 2.447279  | 2.125474  | 0.049411  |
| H   | 3.115907  | 2.984012  | 0.046150  |
| H   | 2.689696  | 1.488016  | 0.897334  |
| H   | 2.583196  | 1.547741  | -0.871322 |
| H   | 0.000073  | 0.786356  | -1.055447 |
| H   | 0.000039  | -0.251001 | 2.144841  |

H<sub>2</sub>SiPh<sub>2</sub>-NHC 1, BE<sub>c</sub> = -1058.75214088 (Hartrees)

M06-2X/def2-TZVP optimized geometry (Å).

|     |           |           |           |
|-----|-----------|-----------|-----------|
| 0 1 |           |           |           |
| Si  | 0.090443  | -0.016144 | 0.986195  |
| C   | -0.960847 | 1.391125  | 0.357352  |
| C   | -0.729678 | 2.675070  | 0.860185  |
| C   | -1.956333 | 1.227033  | -0.608931 |
| C   | -1.468675 | 3.762817  | 0.419109  |
| H   | 0.040431  | 2.830182  | 1.609722  |
| C   | -2.697430 | 2.314738  | -1.053038 |
| H   | -2.154426 | 0.243127  | -1.016259 |
| C   | -2.456466 | 3.581402  | -0.540084 |
| H   | -1.277792 | 4.748824  | 0.823689  |
| H   | -3.466460 | 2.171781  | -1.801782 |
| H   | -3.037541 | 4.427395  | -0.885478 |
| C   | 1.873569  | 0.221459  | 0.468661  |
| C   | 2.214039  | 1.040143  | -0.610291 |
| C   | 2.893868  | -0.490027 | 1.106592  |
| C   | 3.529921  | 1.138880  | -1.043629 |
| H   | 1.439445  | 1.603075  | -1.119934 |
| C   | 4.209602  | -0.396507 | 0.676610  |
| H   | 2.658345  | -1.127349 | 1.953193  |
| C   | 4.528042  | 0.418203  | -0.402452 |
| H   | 3.776963  | 1.777391  | -1.882447 |
| H   | 4.987458  | -0.954033 | 1.183024  |
| H   | 5.553982  | 0.494306  | -0.739885 |
| C   | -0.549786 | -1.685951 | 0.336227  |
| C   | -2.511754 | -2.535172 | -0.476891 |
| C   | -1.657220 | -2.492056 | -1.495154 |
| H   | -3.521781 | -2.911772 | -0.455915 |
| H   | -1.796104 | -2.829480 | -2.509529 |
| N   | -1.984134 | -1.847287 | 0.636700  |
| N   | -0.489294 | -1.778853 | -1.136136 |
| C   | 0.757882  | -2.318528 | -1.645573 |
| H   | 0.968385  | -3.311052 | -1.218860 |
| H   | 0.693219  | -2.407238 | -2.729775 |
| H   | 1.584307  | -1.651651 | -1.404365 |
| C   | -2.260345 | -2.397836 | 1.945685  |
| H   | -3.336598 | -2.510900 | 2.072366  |
| H   | -1.779163 | -3.377780 | 2.086981  |
| H   | -1.897239 | -1.717925 | 2.716701  |
| H   | 0.009055  | -2.550744 | 0.771352  |
| H   | 0.052982  | -0.065903 | 2.470251  |

H<sub>2</sub>SiPh<sub>2</sub>-NHC 1, T2E<sub>c</sub> = -1058.70422682 (Hartrees)

M06-2X/def2-TZVP optimized geometry (Å).

| 0 1 |           |           |           |
|-----|-----------|-----------|-----------|
| Si  | -0.037371 | -0.293264 | -0.814344 |
| C   | 0.540058  | 1.338616  | -0.070890 |
| C   | 1.580890  | 2.060634  | -0.660705 |
| C   | -0.091431 | 1.897670  | 1.040204  |
| C   | 1.982899  | 3.288964  | -0.160073 |
| H   | 2.086129  | 1.650704  | -1.528845 |
| C   | 0.323694  | 3.116149  | 1.565667  |
| H   | -0.925575 | 1.379824  | 1.500716  |
| C   | 1.359826  | 3.815143  | 0.964916  |
| H   | 2.782630  | 3.836403  | -0.643629 |
| H   | -0.169826 | 3.523570  | 2.439204  |
| H   | 1.677368  | 4.769669  | 1.365739  |
| C   | -1.915141 | -0.272719 | -0.456939 |
| C   | -2.793746 | 0.397556  | -1.311793 |
| C   | -2.467121 | -0.907389 | 0.658826  |
| C   | -4.159406 | 0.437994  | -1.067337 |
| H   | -2.402104 | 0.897273  | -2.193117 |
| C   | -3.832987 | -0.873721 | 0.915714  |
| H   | -1.817873 | -1.440563 | 1.348287  |
| C   | -4.682573 | -0.199838 | 0.050244  |
| H   | -4.818022 | 0.963938  | -1.747747 |
| H   | -4.234845 | -1.373829 | 1.788574  |
| H   | -5.747621 | -0.173629 | 0.243421  |
| C   | 0.500197  | -1.933730 | -0.090862 |
| C   | 2.748695  | -0.829809 | 0.113654  |
| C   | 2.237756  | -1.310624 | 1.268548  |
| N   | 2.020662  | -0.961501 | -1.028700 |
| N   | 1.137242  | -2.169351 | 1.073429  |
| C   | 1.344785  | -3.548188 | 1.510118  |
| H   | 2.116822  | -4.033711 | 0.905506  |
| H   | 1.663184  | -3.542617 | 2.551445  |
| H   | 0.408297  | -4.097407 | 1.432229  |
| C   | 2.744719  | -1.150590 | -2.270832 |
| H   | 2.038840  | -1.115913 | -3.101318 |
| H   | 3.473678  | -0.343884 | -2.412700 |
| H   | 3.282360  | -2.102157 | -2.306838 |
| H   | 0.119099  | -2.835363 | -0.576173 |
| H   | -0.033634 | -0.337277 | -2.298209 |
| H   | 2.672872  | -1.215407 | 2.249599  |
| H   | 3.719414  | -0.344682 | 0.080813  |

H<sub>2</sub>SiPh<sub>2</sub>-NHC 1, CE<sub>c</sub> = -1058.73198802 (Hartrees)

M06-2X/def2-TZVP optimized geometry (Å).

| 0 1 |           |           |           |
|-----|-----------|-----------|-----------|
| C   | -0.111357 | 1.987550  | -1.243455 |
| C   | 0.868722  | 3.135422  | 0.587141  |
| C   | 0.630237  | 2.117658  | 1.475997  |
| H   | 1.346437  | 4.054214  | 0.876988  |
| H   | 0.941628  | 2.303176  | 2.504150  |
| H   | -0.513318 | 2.143116  | -2.241318 |
| C   | 0.441505  | 4.330199  | -1.455003 |
| H   | -0.133283 | 5.083105  | -0.919040 |
| H   | 1.479499  | 4.651271  | -1.526901 |
| H   | 0.032702  | 4.177960  | -2.448393 |
| C   | -0.204553 | 0.080619  | 2.333862  |
| H   | 0.512123  | 0.255263  | 3.140840  |
| H   | -1.215773 | 0.225598  | 2.720489  |
| H   | -0.116882 | -0.958956 | 2.017834  |
| N   | 0.390077  | 3.065648  | -0.708936 |
| N   | 0.053180  | 0.963062  | 1.202734  |
| Si  | -0.039845 | 0.176941  | -0.610024 |
| C   | -1.736936 | -0.591733 | -0.261183 |
| C   | -2.017024 | -1.876641 | -0.730536 |
| C   | -2.758148 | 0.092629  | 0.399459  |
| C   | -3.255538 | -2.468548 | -0.527555 |
| H   | -1.249739 | -2.424091 | -1.268029 |
| C   | -4.011758 | -0.479356 | 0.582983  |
| H   | -2.569721 | 1.092648  | 0.778012  |
| C   | -4.259777 | -1.765816 | 0.126163  |
| H   | -3.442235 | -3.472984 | -0.887094 |
| H   | -4.794006 | 0.076492  | 1.085618  |
| H   | -5.232267 | -2.218402 | 0.275220  |
| C   | 1.531725  | -0.878688 | -0.269624 |
| C   | 2.463678  | -0.694736 | 0.756691  |
| C   | 1.769412  | -1.941580 | -1.148426 |
| C   | 3.564867  | -1.528924 | 0.904666  |
| H   | 2.341761  | 0.120833  | 1.459114  |
| C   | 2.849987  | -2.798661 | -0.995469 |
| H   | 1.095277  | -2.090488 | -1.984282 |
| C   | 3.756269  | -2.592421 | 0.034433  |
| H   | 4.274225  | -1.349092 | 1.703431  |
| H   | 2.991941  | -3.618827 | -1.688403 |
| H   | 4.608885  | -3.249351 | 0.153405  |
| H   | -0.030073 | -0.241464 | -2.088755 |



H<sub>2</sub>SiPh<sub>2</sub>-NHC 1, T3E<sub>c</sub> = -1058.72120215 (Hartrees)

M06-2X/def2-TZVP optimized geometry (Å).

|     |           |           |           |
|-----|-----------|-----------|-----------|
| 0 1 |           |           |           |
| C   | -0.090787 | 2.064328  | -0.997569 |
| C   | 1.571217  | 2.907897  | 0.470866  |
| C   | 1.286067  | 2.032114  | 1.460259  |
| H   | 2.356262  | 3.637449  | 0.577496  |
| H   | 1.865750  | 2.122895  | 2.375777  |
| H   | -0.729795 | 2.272122  | -1.850660 |
| C   | 1.240295  | 3.984985  | -1.694024 |
| H   | 1.340409  | 4.944565  | -1.187864 |
| H   | 2.195414  | 3.718980  | -2.151581 |
| H   | 0.481787  | 4.059027  | -2.468938 |
| C   | 0.120073  | 0.272904  | 2.623847  |
| H   | -0.705241 | 0.708331  | 3.193316  |
| H   | -0.147317 | -0.755557 | 2.375796  |
| H   | 1.005684  | 0.241945  | 3.266530  |
| N   | 0.844077  | 2.961061  | -0.736749 |
| N   | 0.371238  | 1.026197  | 1.407949  |
| Si  | -0.019018 | 0.355724  | -0.234210 |
| C   | -1.776965 | -0.284818 | -0.161380 |
| C   | -2.099589 | -1.642562 | -0.229855 |
| C   | -2.824042 | 0.625392  | 0.015635  |
| C   | -3.416870 | -2.073258 | -0.143257 |
| H   | -1.311899 | -2.378043 | -0.343709 |
| C   | -4.142987 | 0.201833  | 0.098959  |
| H   | -2.602522 | 1.683640  | 0.102039  |
| C   | -4.441854 | -1.151181 | 0.015564  |
| H   | -3.643007 | -3.130836 | -0.198170 |
| H   | -4.936729 | 0.925936  | 0.234184  |
| H   | -5.469212 | -1.486864 | 0.081565  |
| C   | 1.229455  | -1.097189 | -0.228155 |
| C   | 2.237939  | -1.265204 | 0.721281  |
| C   | 1.160372  | -2.043356 | -1.257299 |
| C   | 3.130406  | -2.330064 | 0.657571  |
| H   | 2.349639  | -0.543187 | 1.521760  |
| C   | 2.027456  | -3.123132 | -1.317602 |
| H   | 0.417729  | -1.918824 | -2.039542 |
| C   | 3.020733  | -3.268519 | -0.356477 |
| H   | 3.910453  | -2.426294 | 1.402945  |
| H   | 1.940882  | -3.843735 | -2.121452 |
| H   | 3.709623  | -4.102375 | -0.405434 |
| H   | 0.345630  | 0.518863  | -1.853716 |

H<sub>2</sub>SiPh<sub>2</sub>-NHC 1, DE<sub>c</sub> = -1058.80661076 (Hartrees)

M06-2X/def2-TZVP optimized geometry (Å).

|     |           |           |           |
|-----|-----------|-----------|-----------|
| 0 1 |           |           |           |
| C   | 0.755009  | -1.491882 | -1.276933 |
| C   | 2.064684  | -2.585952 | 0.447017  |
| C   | 1.298368  | -2.224738 | 1.482717  |
| H   | 0.040229  | -2.305608 | -1.488908 |
| H   | 2.806495  | -3.357308 | 0.599207  |
| H   | 1.450559  | -2.719145 | 2.434158  |
| H   | 0.899651  | -0.942822 | -2.211734 |
| C   | 2.700695  | -2.813102 | -1.855309 |
| H   | 3.682754  | -3.128040 | -1.502577 |
| H   | 2.118241  | -3.707226 | -2.122977 |
| H   | 2.836465  | -2.211007 | -2.754290 |
| C   | -0.153462 | -0.773678 | 2.766546  |
| H   | -0.468364 | -1.617122 | 3.388004  |
| H   | 0.625823  | -0.221910 | 3.302989  |
| H   | -1.013437 | -0.112891 | 2.642709  |
| N   | 2.041927  | -2.017814 | -0.837862 |
| N   | 0.300993  | -1.239491 | 1.469320  |
| Si  | 0.016794  | -0.344812 | 0.020141  |
| C   | 0.865303  | 1.322887  | 0.000414  |
| C   | 0.242017  | 2.472539  | 0.493812  |
| C   | 2.184256  | 1.431668  | -0.452533 |
| C   | 0.907529  | 3.690158  | 0.530738  |
| H   | -0.782010 | 2.419620  | 0.849599  |
| C   | 2.851658  | 2.648162  | -0.422682 |
| H   | 2.695136  | 0.547997  | -0.823039 |
| C   | 2.213939  | 3.778968  | 0.069694  |
| H   | 0.407814  | 4.569666  | 0.916960  |
| H   | 3.871427  | 2.714764  | -0.780682 |
| H   | 2.734926  | 4.727848  | 0.095233  |
| C   | -1.824028 | -0.113539 | -0.209967 |
| C   | -2.721067 | -1.007033 | 0.381867  |
| C   | -2.342266 | 0.895069  | -1.026621 |
| C   | -4.088419 | -0.894301 | 0.172125  |
| H   | -2.338764 | -1.800222 | 1.016139  |
| C   | -3.708418 | 1.009274  | -1.244829 |
| H   | -1.669615 | 1.605319  | -1.496137 |
| C   | -4.583087 | 0.115234  | -0.642460 |
| H   | -4.768753 | -1.593674 | 0.641677  |
| H   | -4.091048 | 1.796419  | -1.882136 |
| H   | -5.649339 | 0.205425  | -0.807932 |

**Cartesian coordinates for optimized insertion pathway compounds H<sub>2</sub>SiPh<sub>2</sub>-NHC 2**

H<sub>2</sub>SiPh<sub>2</sub>-NHC 2, A

E<sub>c</sub> = -1059.91946498 (Hartrees)

M06-2X/def2-TZVP optimized geometry (Å).

|     |           |           |           |
|-----|-----------|-----------|-----------|
| 0 1 |           |           |           |
| Si  | -0.000123 | -0.192300 | -0.000212 |
| C   | 1.685486  | -1.092701 | -0.124186 |
| C   | 2.300156  | -1.626714 | 1.010096  |
| C   | 2.329971  | -1.261686 | -1.349885 |
| C   | 3.507241  | -2.307330 | 0.928486  |
| H   | 1.815396  | -1.505098 | 1.974366  |
| C   | 3.545446  | -1.929190 | -1.442924 |
| H   | 1.862370  | -0.866825 | -2.245937 |
| C   | 4.135492  | -2.455730 | -0.302050 |
| H   | 3.959197  | -2.723582 | 1.820744  |
| H   | 4.029959  | -2.044938 | -2.405089 |
| H   | 5.079465  | -2.982323 | -0.371063 |
| C   | -1.686053 | -1.092152 | 0.123917  |
| C   | -2.301333 | -1.625523 | -1.010320 |
| C   | -2.330189 | -1.261266 | 1.349788  |
| C   | -3.508696 | -2.305620 | -0.928532 |
| H   | -1.816795 | -1.503864 | -1.974698 |
| C   | -3.545905 | -1.928308 | 1.443027  |
| H   | -1.862134 | -0.866829 | 2.245790  |
| C   | -4.136580 | -2.454179 | 0.302178  |
| H   | -3.961149 | -2.721378 | -1.820769 |
| H   | -4.030125 | -2.044188 | 2.405324  |
| H   | -5.080769 | -2.980369 | 0.371339  |
| C   | 0.000500  | 1.824097  | -0.000135 |
| C   | 0.708051  | 4.012088  | 0.292228  |
| C   | -0.706137 | 4.012498  | -0.291556 |
| H   | 1.455869  | 4.356519  | -0.428197 |
| H   | -0.797890 | 4.608913  | -1.199066 |
| N   | 0.915090  | 2.592517  | 0.580591  |
| N   | -0.913766 | 2.593138  | -0.580601 |
| C   | -2.153912 | 2.136889  | -1.168160 |
| H   | -2.976451 | 2.214048  | -0.452499 |
| H   | -2.382369 | 2.749957  | -2.040712 |
| H   | -2.044634 | 1.100872  | -1.477761 |
| C   | 2.154900  | 2.135430  | 1.168209  |
| H   | 2.977566  | 2.212088  | 0.452652  |
| H   | 2.383677  | 2.748364  | 2.040789  |
| H   | 2.044821  | 1.099538  | 1.477911  |
| H   | -0.113542 | -0.053378 | -1.547695 |
| H   | 0.113210  | -0.053301 | 1.547291  |
| H   | -1.453756 | 4.356805  | 0.429146  |
| H   | 0.799905  | 4.607963  | 1.200083  |

H<sub>2</sub>SiPh<sub>2</sub>-NHC 2, T1

E<sub>c</sub> = -1059.91085739 (Hartrees)

M06-2X/def2-TZVP optimized geometry (Å).

|     |           |           |           |
|-----|-----------|-----------|-----------|
| 0 1 |           |           |           |
| Si  | 0.120812  | -0.167961 | -0.582106 |
| C   | -1.329394 | -1.273643 | -0.075754 |
| C   | -1.793406 | -2.238286 | -0.973360 |
| C   | -1.978071 | -1.164414 | 1.155129  |
| C   | -2.864588 | -3.063765 | -0.656217 |
| H   | -1.310882 | -2.339284 | -1.940030 |
| C   | -3.056255 | -1.977962 | 1.476508  |
| H   | -1.630819 | -0.423876 | 1.867694  |
| C   | -3.501509 | -2.931280 | 0.570072  |
| H   | -3.206179 | -3.806615 | -1.366560 |
| H   | -3.547276 | -1.872164 | 2.436231  |
| H   | -4.340775 | -3.568701 | 0.819208  |
| C   | 1.888561  | -0.703377 | -0.193718 |
| C   | 2.339704  | -0.910417 | 1.111426  |
| C   | 2.779050  | -0.943900 | -1.240991 |
| C   | 3.636677  | -1.332221 | 1.363640  |
| H   | 1.660682  | -0.730375 | 1.938037  |
| C   | 4.085584  | -1.350016 | -0.996534 |
| H   | 2.443481  | -0.809160 | -2.263686 |
| C   | 4.515424  | -1.544607 | 0.307939  |
| H   | 3.965990  | -1.495234 | 2.382454  |
| H   | 4.765768  | -1.518539 | -1.822210 |
| H   | 5.530951  | -1.866220 | 0.503231  |
| C   | -0.333232 | 1.658328  | -0.401764 |
| C   | -1.712881 | 3.433235  | 0.184551  |
| C   | -0.298584 | 3.649501  | 0.707936  |
| H   | -2.469191 | 3.497749  | 0.969225  |
| H   | -0.223531 | 3.338942  | 1.760732  |
| N   | -1.611966 | 2.086614  | -0.360375 |
| N   | 0.480188  | 2.727141  | -0.115610 |
| C   | 1.848220  | 2.523640  | 0.294144  |
| H   | 2.384801  | 1.940323  | -0.450902 |
| H   | 2.329696  | 3.495273  | 0.397877  |
| H   | 1.890555  | 1.987044  | 1.252398  |
| C   | -2.743468 | 1.478173  | -1.017339 |
| H   | -3.448212 | 1.054438  | -0.297578 |
| H   | -3.259257 | 2.233268  | -1.617454 |
| H   | -2.406833 | 0.680248  | -1.675306 |
| H   | 0.005656  | 0.633735  | 0.976748  |
| H   | 0.119258  | -0.440574 | -2.074997 |
| H   | 0.059493  | 4.672517  | 0.605023  |
| H   | -1.973281 | 4.138451  | -0.612774 |

H<sub>2</sub>SiPh<sub>2</sub>-NHC 2, BE<sub>c</sub> = -1059.96914341 (Hartrees)

M06-2X/def2-TZVP optimized geometry (Å).

|     |           |           |           |
|-----|-----------|-----------|-----------|
| 0 1 |           |           |           |
| Si  | 0.088738  | 0.122003  | 1.012305  |
| C   | -1.147007 | 1.329434  | 0.306779  |
| C   | -1.516636 | 2.456225  | 1.044316  |
| C   | -1.706726 | 1.156403  | -0.962970 |
| C   | -2.415204 | 3.384445  | 0.534917  |
| H   | -1.100627 | 2.611517  | 2.034246  |
| C   | -2.604859 | 2.081833  | -1.475456 |
| H   | -1.431707 | 0.286459  | -1.548114 |
| C   | -2.960337 | 3.196760  | -0.727097 |
| H   | -2.690837 | 4.251107  | 1.122520  |
| H   | -3.031959 | 1.933342  | -2.459512 |
| H   | -3.663100 | 3.917058  | -1.126995 |
| C   | 1.835767  | 0.529056  | 0.481896  |
| C   | 2.093155  | 1.141027  | -0.746592 |
| C   | 2.923647  | 0.147120  | 1.271063  |
| C   | 3.395041  | 1.353649  | -1.178794 |
| H   | 1.264002  | 1.451150  | -1.373491 |
| C   | 4.227561  | 0.355606  | 0.843224  |
| H   | 2.752390  | -0.321158 | 2.235087  |
| C   | 4.463866  | 0.957558  | -0.385392 |
| H   | 3.576670  | 1.829426  | -2.134370 |
| H   | 5.058916  | 0.053132  | 1.467546  |
| H   | 5.479625  | 1.122721  | -0.721920 |
| C   | -0.314327 | -1.653344 | 0.448146  |
| C   | -1.930569 | -3.085658 | -0.317196 |
| C   | -1.163505 | -2.617798 | -1.543860 |
| H   | -2.991286 | -3.257716 | -0.502525 |
| H   | -1.801890 | -2.002373 | -2.182028 |
| N   | -1.729816 | -1.966786 | 0.586842  |
| N   | -0.056294 | -1.807131 | -0.997438 |
| C   | 1.253808  | -2.366291 | -1.277022 |
| H   | 1.362656  | -3.390326 | -0.883936 |
| H   | 1.420195  | -2.385756 | -2.354122 |
| H   | 2.029438  | -1.745449 | -0.829461 |
| C   | -2.144087 | -2.220972 | 1.946206  |
| H   | -3.206976 | -2.462467 | 1.963549  |
| H   | -1.587124 | -3.058090 | 2.400613  |
| H   | -1.989419 | -1.332352 | 2.559849  |
| H   | 0.295244  | -2.397867 | 1.012362  |
| H   | 0.046234  | 0.195550  | 2.495921  |
| H   | -0.779284 | -3.447896 | -2.139385 |
| H   | -1.488245 | -4.010953 | 0.093058  |

H<sub>2</sub>SiPh<sub>2</sub>-NHC 2, T2E<sub>c</sub> = -1059.91260035 (Hartrees)

M06-2X/def2-TZVP optimized geometry (Å).

|    |           |           |           |
|----|-----------|-----------|-----------|
| C  | -0.236956 | 2.057347  | -0.950779 |
| C  | 1.892134  | 2.365875  | -0.134550 |
| C  | 1.368943  | 1.821133  | 1.215671  |
| H  | -1.206612 | 2.500020  | -1.190183 |
| C  | 0.535165  | 4.360483  | -0.751210 |
| H  | 0.498925  | 4.681909  | 0.292744  |
| H  | 1.352699  | 4.875164  | -1.254888 |
| H  | -0.402645 | 4.614653  | -1.238512 |
| C  | -0.564840 | 0.934344  | 2.297629  |
| H  | 0.069303  | 0.434915  | 3.044985  |
| H  | -0.871082 | 1.895535  | 2.732518  |
| H  | -1.451045 | 0.320205  | 2.158600  |
| N  | 0.739274  | 2.920316  | -0.829053 |
| N  | 0.127739  | 1.119635  | 1.038757  |
| Si | -0.082603 | 0.158371  | -0.622146 |
| C  | -1.815549 | -0.513907 | -0.298571 |
| C  | -2.052566 | -1.872012 | -0.522738 |
| C  | -2.904971 | 0.280276  | 0.064286  |
| C  | -3.320245 | -2.419202 | -0.379968 |
| H  | -1.227617 | -2.512336 | -0.819208 |
| C  | -4.180924 | -0.254214 | 0.194588  |
| H  | -2.757797 | 1.336813  | 0.268831  |
| C  | -4.390114 | -1.608552 | -0.024609 |
| H  | -3.476144 | -3.477058 | -0.551812 |
| H  | -5.010891 | 0.384130  | 0.471944  |
| H  | -5.381778 | -2.030227 | 0.081579  |
| C  | 1.362396  | -1.050087 | -0.275266 |
| C  | 1.696536  | -1.475175 | 1.014938  |
| C  | 2.102611  | -1.580437 | -1.333701 |
| C  | 2.714250  | -2.392258 | 1.239106  |
| H  | 1.140594  | -1.088850 | 1.861922  |
| C  | 3.140254  | -2.480633 | -1.120527 |
| H  | 1.850530  | -1.284946 | -2.346654 |
| C  | 3.445509  | -2.891835 | 0.168725  |
| H  | 2.939919  | -2.717108 | 2.247625  |
| H  | 3.703122  | -2.868876 | -1.960740 |
| H  | 4.245204  | -3.601731 | 0.339856  |
| H  | -0.039132 | -0.155131 | -2.127198 |
| H  | 2.163289  | 1.175880  | 1.619252  |
| H  | 1.235258  | 2.653789  | 1.921296  |
| H  | 2.657912  | 3.125819  | 0.006799  |
| H  | 2.305551  | 1.553681  | -0.734788 |

H<sub>2</sub>SiPh<sub>2</sub>-NHC 2, CE<sub>c</sub> = -1059.93458802 (Hartrees)

M06-2X/def2-TZVP optimized geometry (Å).

|     |           |           |           |
|-----|-----------|-----------|-----------|
| 0 1 |           |           |           |
| C   | 0.372404  | -0.664143 | 1.188785  |
| C   | 1.837963  | -2.464170 | 0.688590  |
| C   | 0.743488  | -2.912381 | -0.260046 |
| H   | 2.156999  | -3.294044 | 1.324124  |
| H   | 1.130124  | -3.791458 | -0.783205 |
| C   | 2.203849  | -1.132703 | 2.738022  |
| H   | 2.237493  | -2.022823 | 3.366786  |
| H   | 3.217150  | -0.887667 | 2.414124  |
| H   | 1.789934  | -0.296611 | 3.294557  |
| C   | 0.137856  | -2.497764 | -2.550124 |
| H   | 1.050807  | -2.965229 | -2.936586 |
| H   | -0.644681 | -3.267163 | -2.522928 |
| H   | -0.172483 | -1.728898 | -3.252454 |
| N   | 1.374882  | -1.384062 | 1.563391  |
| N   | 0.368017  | -1.912415 | -1.238572 |
| Si  | -0.242376 | -0.313091 | -0.830634 |
| C   | -1.985111 | 0.115832  | -0.197267 |
| C   | -2.700025 | 1.113805  | -0.864944 |
| C   | -2.610062 | -0.501152 | 0.887766  |
| C   | -3.967311 | 1.501983  | -0.451999 |
| H   | -2.249769 | 1.593280  | -1.728604 |
| C   | -3.889907 | -0.143412 | 1.293504  |
| H   | -2.090239 | -1.288223 | 1.427462  |
| C   | -4.568048 | 0.868773  | 0.628093  |
| H   | -4.491905 | 2.290787  | -0.977319 |
| H   | -4.357887 | -0.649840 | 2.128994  |
| H   | -5.561455 | 1.159115  | 0.946469  |
| C   | 1.030813  | 1.086439  | -0.495388 |
| C   | 2.324162  | 0.969003  | -1.015957 |
| C   | 0.726944  | 2.244841  | 0.224988  |
| C   | 3.273684  | 1.964401  | -0.827638 |
| H   | 2.584336  | 0.088632  | -1.596750 |
| C   | 1.670231  | 3.248612  | 0.413678  |
| H   | -0.269411 | 2.370494  | 0.639094  |
| C   | 2.948272  | 3.108817  | -0.109341 |
| H   | 4.265707  | 1.854367  | -1.249290 |
| H   | 1.406705  | 4.141067  | 0.968323  |
| H   | 3.685356  | 3.888631  | 0.035437  |
| H   | -0.111597 | -3.259091 | 0.339852  |
| H   | 2.705991  | -2.098230 | 0.130907  |
| H   | 0.129868  | 0.115037  | 1.917781  |
| H   | -0.513286 | 0.065790  | -2.275962 |

H<sub>2</sub>SiPh<sub>2</sub>-NHC 2, T3E<sub>c</sub> = -1059.91260017 (Hartrees)

M06-2X/def2-TZVP optimized geometry (Å).

|     |           |           |           |
|-----|-----------|-----------|-----------|
| 0 1 |           |           |           |
| C   | -0.236677 | 2.057468  | -0.950907 |
| C   | 1.892318  | 2.365765  | -0.134248 |
| C   | 1.368797  | 1.821333  | 1.215964  |
| H   | -1.206181 | 2.500310  | -1.190618 |
| C   | 0.535849  | 4.360511  | -0.751687 |
| H   | 0.499295  | 4.682245  | 0.292160  |
| H   | 1.353685  | 4.874863  | -1.255213 |
| H   | -0.401720 | 4.614755  | -1.239413 |
| C   | -0.565142 | 0.934398  | 2.297619  |
| H   | 0.068769  | 0.434669  | 3.044973  |
| H   | -0.871220 | 1.895567  | 2.732671  |
| H   | -1.451480 | 0.320499  | 2.158334  |
| N   | 0.739662  | 2.920278  | -0.829043 |
| N   | 0.127637  | 1.119809  | 1.038876  |
| Si  | -0.082581 | 0.158504  | -0.622030 |
| C   | -1.815543 | -0.513745 | -0.298516 |
| C   | -2.052422 | -1.871965 | -0.522118 |
| C   | -2.905088 | 0.280523  | 0.063797  |
| C   | -3.320101 | -2.419171 | -0.379378 |
| H   | -1.227378 | -2.512380 | -0.818121 |
| C   | -4.181025 | -0.253997 | 0.194095  |
| H   | -2.758018 | 1.337149  | 0.267955  |
| C   | -4.390091 | -1.608442 | -0.024581 |
| H   | -3.475900 | -3.477109 | -0.550807 |
| H   | -5.011079 | 0.384410  | 0.471045  |
| H   | -5.381750 | -2.030131 | 0.081598  |
| C   | 1.362324  | -1.050126 | -0.275215 |
| C   | 1.696989  | -1.474808 | 1.014992  |
| C   | 2.101921  | -1.581080 | -1.333788 |
| C   | 2.714556  | -2.392091 | 1.239029  |
| H   | 1.141594  | -1.088005 | 1.862107  |
| C   | 3.139376  | -2.481526 | -1.120769 |
| H   | 1.849484  | -1.285864 | -2.346730 |
| C   | 3.445126  | -2.892332 | 0.168494  |
| H   | 2.940642  | -2.716574 | 2.247573  |
| H   | 3.701703  | -2.870284 | -1.961107 |
| H   | 4.244681  | -3.602412 | 0.339514  |
| H   | -0.039016 | -0.155005 | -2.127110 |
| H   | 2.658194  | 3.125607  | 0.007110  |
| H   | 2.163064  | 1.176184  | 1.619873  |
| H   | 2.305717  | 1.553397  | -0.734268 |
| H   | 1.234963  | 2.654149  | 1.921380  |

## H<sub>2</sub>SiPh<sub>2</sub>-NHC 2, D

E<sub>c</sub> = -1060.02081835 (Hartrees)

M06-2X/def2-TZVP optimized geometry (Å).

|     |           |           |           |
|-----|-----------|-----------|-----------|
| 0 1 |           |           |           |
| C   | 0.782697  | -1.456855 | -1.291420 |
| C   | 1.946409  | -2.706478 | 0.406892  |
| C   | 1.617570  | -1.833823 | 1.606040  |
| H   | 0.092626  | -2.288799 | -1.524934 |
| H   | 2.899505  | -3.200890 | 0.605363  |
| H   | 1.590739  | -2.476398 | 2.493595  |
| H   | 0.924131  | -0.894741 | -2.219280 |
| C   | 2.700602  | -2.775574 | -1.862125 |
| H   | 3.687380  | -3.103520 | -1.532566 |
| H   | 2.097346  | -3.666927 | -2.102598 |
| H   | 2.817777  | -2.190250 | -2.774710 |
| C   | -0.059745 | -0.507137 | 2.730044  |
| H   | -0.146928 | -1.245026 | 3.533517  |
| H   | 0.662069  | 0.258067  | 3.048564  |
| H   | -1.032434 | -0.025045 | 2.611567  |
| N   | 2.079203  | -1.958600 | -0.836045 |
| N   | 0.332529  | -1.157444 | 1.492089  |
| Si  | 0.007050  | -0.338194 | 0.004644  |
| C   | 0.788327  | 1.366600  | -0.060551 |
| C   | 0.146687  | 2.481669  | 0.487440  |
| C   | 2.073188  | 1.541749  | -0.585919 |
| C   | 0.758170  | 3.727389  | 0.505416  |
| H   | -0.851834 | 2.377814  | 0.900635  |
| C   | 2.688312  | 2.786484  | -0.572831 |
| H   | 2.600339  | 0.687889  | -0.999636 |
| C   | 2.031121  | 3.880927  | -0.027631 |
| H   | 0.243207  | 4.578507  | 0.933151  |
| H   | 3.681797  | 2.903371  | -0.987660 |
| H   | 2.509993  | 4.852071  | -0.017650 |
| C   | -1.844080 | -0.180028 | -0.203347 |
| C   | -2.701432 | -1.100678 | 0.405804  |
| C   | -2.408309 | 0.809585  | -1.012352 |
| C   | -4.074840 | -1.033612 | 0.217054  |
| H   | -2.281001 | -1.875020 | 1.038848  |
| C   | -3.780939 | 0.878179  | -1.209098 |
| H   | -1.767191 | 1.541801  | -1.492155 |
| C   | -4.615690 | -0.043242 | -0.592144 |
| H   | -4.724407 | -1.752633 | 0.700396  |
| H   | -4.199594 | 1.651408  | -1.840839 |
| H   | -5.686869 | 0.010812  | -0.740733 |
| H   | 2.436839  | -1.112907 | 1.755075  |
| H   | 1.177401  | -3.493483 | 0.307099  |

## Cartesian coordinates for optimized insertion pathway compounds H<sub>2</sub>SiPh<sub>2</sub>-NHC 3

H<sub>2</sub>SiPh<sub>2</sub>-NHC 3, A

E<sub>c</sub> = -1137.35399208 (Hartrees)

M06-2X/def2-TZVP optimized geometry (Å).

|     |           |           |           |
|-----|-----------|-----------|-----------|
| 0 1 |           |           |           |
| Si  | -0.674667 | 0.277771  | -0.040833 |
| C   | -2.316532 | -0.712544 | -0.174705 |
| C   | -3.031621 | -1.075446 | 0.968455  |
| C   | -2.841545 | -1.085980 | -1.412177 |
| C   | -4.226347 | -1.778524 | 0.884411  |
| H   | -2.637890 | -0.793441 | 1.940601  |
| C   | -4.028898 | -1.801132 | -1.509467 |
| H   | -2.305940 | -0.803052 | -2.312522 |
| C   | -4.725125 | -2.146571 | -0.358733 |
| H   | -4.770643 | -2.039031 | 1.784246  |
| H   | -4.415063 | -2.086039 | -2.480821 |
| H   | -5.654502 | -2.698371 | -0.429975 |
| C   | -0.411643 | 2.161856  | 0.207450  |
| C   | -0.558402 | 3.061877  | -0.849536 |
| C   | -0.035500 | 2.677570  | 1.447890  |
| C   | -0.342447 | 4.423019  | -0.679283 |
| H   | -0.848416 | 2.681042  | -1.824414 |
| C   | 0.202587  | 4.035279  | 1.627289  |
| H   | 0.066117  | 1.996228  | 2.286463  |
| C   | 0.045933  | 4.911706  | 0.562143  |
| H   | -0.475832 | 5.104817  | -1.510606 |
| H   | 0.502866  | 4.411624  | 2.597880  |
| H   | 0.221472  | 5.971732  | 0.699157  |
| C   | 1.055976  | -0.688351 | -0.120269 |
| C   | 2.718167  | -2.134929 | 0.322780  |
| C   | 3.239568  | -1.129249 | -0.425272 |
| N   | 1.376329  | -1.837553 | 0.492926  |
| N   | 2.192552  | -0.262049 | -0.692170 |
| C   | 2.316328  | 0.986992  | -1.428908 |
| H   | 2.579459  | 1.801880  | -0.754211 |
| H   | 3.082122  | 0.875059  | -2.193168 |
| H   | 1.359013  | 1.205821  | -1.894971 |
| C   | 0.450348  | -2.647003 | 1.268238  |
| H   | 0.618746  | -3.698814 | 1.043320  |
| H   | 0.597979  | -2.470037 | 2.333435  |
| H   | -0.567706 | -2.378846 | 1.000793  |
| H   | -0.597358 | 0.421312  | -1.592893 |
| H   | -0.610891 | 0.013752  | 1.497564  |
| C   | 3.341003  | -3.359219 | 0.890066  |
| H   | 3.183520  | -3.421112 | 1.968320  |
| H   | 2.927721  | -4.263933 | 0.439471  |
| H   | 4.412919  | -3.353256 | 0.705120  |
| C   | 4.621249  | -0.893408 | -0.919914 |
| H   | 4.671014  | -0.934742 | -2.009831 |
| H   | 4.992693  | 0.082937  | -0.603636 |
| H   | 5.293170  | -1.652761 | -0.525711 |

H<sub>2</sub>SiPh<sub>2</sub>-NHC 3, T1E<sub>c</sub> = -1137.33103608 (Hartrees)

M06-2X/def2-TZVP optimized geometry (Å).

|     |           |           |           |
|-----|-----------|-----------|-----------|
| 0 1 |           |           |           |
| Si  | -0.581094 | -0.000075 | 0.694827  |
| C   | -1.447132 | -1.590253 | 0.173273  |
| C   | -1.986004 | -2.411709 | 1.165821  |
| C   | -1.638484 | -1.964410 | -1.158727 |
| C   | -2.665862 | -3.580451 | 0.845632  |
| H   | -1.868732 | -2.133792 | 2.207757  |
| C   | -2.326889 | -3.123830 | -1.486860 |
| H   | -1.228044 | -1.342742 | -1.946090 |
| C   | -2.836193 | -3.938619 | -0.483648 |
| H   | -3.065199 | -4.208238 | 1.632439  |
| H   | -2.467734 | -3.392920 | -2.526370 |
| H   | -3.370084 | -4.845571 | -0.738526 |
| C   | -1.447690 | 1.589838  | 0.173544  |
| C   | -1.640458 | 1.963201  | -1.158473 |
| C   | -1.985533 | 2.411835  | 1.166196  |
| C   | -2.329275 | 3.122391  | -1.486556 |
| H   | -1.230842 | 1.341071  | -1.945899 |
| C   | -2.665742 | 3.580381  | 0.846045  |
| H   | -1.867193 | 2.134486  | 2.208166  |
| C   | -2.837511 | 3.937753  | -0.483269 |
| H   | -2.471283 | 3.390848  | -2.526073 |
| H   | -3.064262 | 4.208627  | 1.632899  |
| H   | -3.371719 | 4.844529  | -0.738105 |
| C   | 1.277258  | 0.000345  | 0.477609  |
| C   | 3.354474  | -0.672345 | -0.104293 |
| C   | 3.354267  | 0.673291  | -0.104732 |
| N   | 2.112285  | -1.088473 | 0.393034  |
| N   | 2.111943  | 1.089396  | 0.392328  |
| C   | 1.622283  | 2.436479  | 0.241915  |
| H   | 0.894641  | 2.660050  | 1.019080  |
| H   | 2.452475  | 3.133475  | 0.328889  |
| H   | 1.136564  | 2.560500  | -0.733401 |
| C   | 1.623183  | -2.435911 | 0.243999  |
| H   | 1.138214  | -2.561432 | -0.731482 |
| H   | 2.453523  | -3.132542 | 0.332546  |
| H   | 0.895017  | -2.658613 | 1.020932  |
| H   | 0.399266  | 0.000064  | -0.941540 |
| H   | -0.875166 | -0.000308 | 2.175857  |
| C   | 4.433762  | -1.641675 | -0.424864 |
| H   | 4.699190  | -2.243581 | 0.447886  |
| H   | 4.138085  | -2.323923 | -1.224421 |
| H   | 5.326391  | -1.111323 | -0.749612 |
| C   | 4.433298  | 1.642693  | -0.425967 |
| H   | 4.137633  | 2.324045  | -1.226288 |
| H   | 4.698254  | 2.245540  | 0.446275  |
| H   | 5.326212  | 1.112323  | -0.749904 |

H<sub>2</sub>SiPh<sub>2</sub>-NHC 3, BE<sub>c</sub> = -1137.38006806 (Hartrees)

M06-2X/def2-TZVP optimized geometry (Å).

|     |           |           |           |
|-----|-----------|-----------|-----------|
| 0 1 |           |           |           |
| Si  | 0.566230  | 0.122631  | 1.110344  |
| C   | 0.250517  | 1.815052  | 0.385995  |
| C   | 1.175874  | 2.832123  | 0.640072  |
| C   | -0.845108 | 2.107815  | -0.429528 |
| C   | 1.017486  | 4.100679  | 0.101080  |
| H   | 2.041449  | 2.629633  | 1.263818  |
| C   | -1.005861 | 3.376718  | -0.971868 |
| H   | -1.578211 | 1.339854  | -0.643234 |
| C   | -0.077007 | 4.373354  | -0.708608 |
| H   | 1.746517  | 4.873734  | 0.308918  |
| H   | -1.859741 | 3.587865  | -1.603552 |
| H   | -0.204353 | 5.360849  | -1.134488 |
| C   | 2.199934  | -0.536317 | 0.469396  |
| C   | 2.772090  | -0.029214 | -0.699091 |
| C   | 2.829522  | -1.614508 | 1.098228  |
| C   | 3.930589  | -0.584126 | -1.227092 |
| H   | 2.302129  | 0.807166  | -1.204729 |
| C   | 3.985282  | -2.175141 | 0.573415  |
| H   | 2.411492  | -2.024583 | 2.012315  |
| C   | 4.536317  | -1.659784 | -0.593077 |
| H   | 4.359736  | -0.177815 | -2.134319 |
| H   | 4.459046  | -3.010306 | 1.073830  |
| H   | 5.439144  | -2.093936 | -1.003693 |
| C   | -0.836369 | -1.081679 | 0.665942  |
| C   | -3.055336 | -0.911833 | 0.087858  |
| C   | -2.397494 | -1.305399 | -1.006142 |
| N   | -2.132977 | -0.543372 | 1.106153  |
| N   | -0.991527 | -1.232615 | -0.790175 |
| C   | -0.203801 | -2.319859 | -1.341860 |
| H   | -0.494547 | -3.289787 | -0.907272 |
| H   | -0.334138 | -2.360765 | -2.422277 |
| H   | 0.852207  | -2.150538 | -1.136606 |
| C   | -2.474888 | -0.905343 | 2.465823  |
| H   | -3.422569 | -0.448095 | 2.746702  |
| H   | -2.550192 | -1.997339 | 2.592372  |
| H   | -1.709259 | -0.531491 | 3.145740  |
| H   | -0.690779 | -2.091990 | 1.118255  |
| H   | 0.651521  | 0.192875  | 2.591177  |
| C   | -4.507641 | -0.671464 | 0.298414  |
| H   | -5.062958 | -0.825598 | -0.624327 |
| H   | -4.923210 | -1.341078 | 1.054969  |
| H   | -4.676216 | 0.354398  | 0.637919  |
| C   | -2.909691 | -1.633763 | -2.362965 |
| H   | -2.714505 | -2.675444 | -2.628134 |
| H   | -3.983646 | -1.470089 | -2.422361 |
| H   | -2.421097 | -1.006310 | -3.113634 |

H<sub>2</sub>SiPh<sub>2</sub>-NHC 3, T2E<sub>c</sub> = -1137.32804861 (Hartrees)

M06-2X/def2-TZVP optimized geometry (Å).

|    |           |           |           |
|----|-----------|-----------|-----------|
| Si | 0.413961  | -0.240961 | 0.958434  |
| C  | -0.081997 | 1.379463  | 0.132288  |
| C  | -0.916876 | 2.286412  | 0.788408  |
| C  | 0.400765  | 1.734227  | -1.128093 |
| C  | -1.265934 | 3.498081  | 0.208683  |
| H  | -1.298775 | 2.039598  | 1.774418  |
| C  | 0.032804  | 2.931719  | -1.728887 |
| H  | 1.083149  | 1.069361  | -1.647303 |
| C  | -0.799637 | 3.817846  | -1.059928 |
| H  | -1.900951 | 4.193267  | 0.744347  |
| H  | 0.406544  | 3.179094  | -2.714767 |
| H  | -1.075870 | 4.758355  | -1.520010 |
| C  | 2.260943  | -0.357966 | 0.449978  |
| C  | 3.226429  | 0.399027  | 1.119621  |
| C  | 2.700835  | -1.163599 | -0.602684 |
| C  | 4.565354  | 0.359632  | 0.757803  |
| H  | 2.924355  | 1.035030  | 1.947151  |
| C  | 4.039528  | -1.212707 | -0.976839 |
| H  | 1.983016  | -1.767922 | -1.151120 |
| C  | 4.975532  | -0.449105 | -0.295308 |
| H  | 5.291921  | 0.956672  | 1.295462  |
| H  | 4.351657  | -1.845955 | -1.798568 |
| H  | 6.019651  | -0.483980 | -0.580482 |
| C  | -0.259839 | -1.877807 | 0.349704  |
| C  | -2.436400 | -0.557819 | 0.279029  |
| C  | -2.054310 | -1.131355 | -0.894007 |
| N  | -1.610451 | -0.713578 | 1.365482  |
| N  | -1.033302 | -2.098032 | -0.723341 |
| C  | -1.409260 | -3.467056 | -1.070663 |
| H  | -2.225182 | -3.816432 | -0.430095 |
| H  | -1.734436 | -3.498866 | -2.109147 |
| H  | -0.543674 | -4.117081 | -0.959323 |
| C  | -2.198412 | -0.761861 | 2.688947  |
| H  | -2.666491 | 0.194769  | 2.950068  |
| H  | -2.951023 | -1.549685 | 2.794058  |
| H  | -1.403220 | -0.943333 | 3.412307  |
| H  | 0.087093  | -2.787953 | 0.844047  |
| H  | 0.558199  | -0.181191 | 2.436219  |
| C  | -3.700781 | 0.234042  | 0.426053  |
| H  | -4.221979 | 0.334815  | -0.522109 |
| H  | -4.375441 | -0.262503 | 1.126711  |
| H  | -3.489684 | 1.231663  | 0.817630  |
| C  | -2.680311 | -0.977208 | -2.244581 |
| H  | -3.458936 | -1.719622 | -2.443833 |
| H  | -3.121993 | 0.010810  | -2.357655 |
| H  | -1.917708 | -1.077992 | -3.018216 |

H<sub>2</sub>SiPh<sub>2</sub>-NHC 3, CE<sub>c</sub> = -1137.34325828 (Hartrees)

M06-2X/def2-TZVP optimized geometry (Å).

|     |           |           |           |
|-----|-----------|-----------|-----------|
| 0 1 |           |           |           |
| C   | -0.722182 | -1.294872 | -1.566512 |
| C   | -2.566661 | -1.377960 | -0.045871 |
| C   | -1.817936 | -0.891840 | 1.018337  |
| H   | -0.338634 | -1.747359 | -2.477603 |
| C   | -2.624805 | -2.624475 | -2.145415 |
| H   | -3.089999 | -3.421143 | -1.570440 |
| H   | -3.390566 | -2.084975 | -2.699467 |
| H   | -1.903694 | -3.039206 | -2.841555 |
| C   | 0.144518  | -0.094387 | 2.136549  |
| H   | -0.443272 | 0.610142  | 2.728904  |
| H   | 0.403545  | -0.951675 | 2.765141  |
| H   | 1.072372  | 0.404589  | 1.866646  |
| N   | -1.918469 | -1.702312 | -1.239441 |
| N   | -0.543639 | -0.506386 | 0.917390  |
| Si  | 0.349096  | 0.042736  | -0.754896 |
| C   | 2.014361  | -0.696104 | -0.214907 |
| C   | 3.209927  | -0.047389 | -0.529823 |
| C   | 2.101356  | -1.925569 | 0.441358  |
| C   | 4.440970  | -0.584830 | -0.179982 |
| H   | 3.176842  | 0.895979  | -1.064300 |
| C   | 3.328656  | -2.485977 | 0.772052  |
| H   | 1.189659  | -2.453799 | 0.701609  |
| C   | 4.502840  | -1.810893 | 0.469389  |
| H   | 5.352912  | -0.053184 | -0.422194 |
| H   | 3.370360  | -3.447566 | 1.269333  |
| H   | 5.461504  | -2.239669 | 0.733557  |
| C   | -0.039870 | 1.890012  | -0.384670 |
| C   | -1.040413 | 2.367439  | 0.466570  |
| C   | 0.728096  | 2.851591  | -1.050497 |
| C   | -1.259657 | 3.727057  | 0.652181  |
| H   | -1.680998 | 1.669448  | 0.991802  |
| C   | 0.543001  | 4.212026  | -0.847881 |
| H   | 1.479131  | 2.522126  | -1.759981 |
| C   | -0.458321 | 4.655587  | 0.004733  |
| H   | -2.056135 | 4.061455  | 1.305977  |
| H   | 1.169116  | 4.926836  | -1.367647 |
| H   | -0.619292 | 5.715788  | 0.155462  |
| H   | 0.848194  | 0.413000  | -2.164306 |
| C   | -4.052206 | -1.613421 | 0.025312  |
| H   | -4.526297 | -1.442802 | -0.940500 |
| H   | -4.332385 | -2.620141 | 0.354773  |
| H   | -4.514943 | -0.904440 | 0.707522  |
| C   | -2.487752 | -0.837528 | 2.372632  |
| H   | -2.713122 | 0.193712  | 2.658873  |
| H   | -3.407608 | -1.410915 | 2.397472  |
| H   | -1.822808 | -1.244444 | 3.132482  |

H<sub>2</sub>SiPh<sub>2</sub>-NHC 3, T3E<sub>c</sub> = -1137.33260721 (Hartrees)

M06-2X/def2-TZVP optimized geometry (Å).

|    |           |           |           |
|----|-----------|-----------|-----------|
| C  | -0.641164 | -1.566505 | -1.284823 |
| C  | -2.670336 | -1.170988 | -0.068454 |
| C  | -2.021768 | -0.779686 | 1.068809  |
| H  | -0.145483 | -2.162164 | -2.044512 |
| C  | -2.702527 | -2.340354 | -2.265160 |
| H  | -3.478671 | -2.981810 | -1.853876 |
| H  | -3.159566 | -1.603020 | -2.927590 |
| H  | -2.007789 | -2.942823 | -2.844448 |
| C  | -0.041038 | -0.375795 | 2.458058  |
| H  | -0.449310 | 0.503980  | 2.965918  |
| H  | -0.138727 | -1.232690 | 3.130767  |
| H  | 1.023792  | -0.200463 | 2.307113  |
| N  | -1.953396 | -1.688271 | -1.194090 |
| N  | -0.649890 | -0.641183 | 1.164547  |
| Si | 0.224546  | -0.216852 | -0.372376 |
| C  | 2.006362  | -0.734439 | -0.131023 |
| C  | 3.072650  | 0.164948  | -0.194107 |
| C  | 2.294955  | -2.073542 | 0.149811  |
| C  | 4.380822  | -0.258203 | 0.000247  |
| H  | 2.878175  | 1.213307  | -0.389842 |
| C  | 3.600818  | -2.503419 | 0.343074  |
| H  | 1.482998  | -2.788615 | 0.231494  |
| C  | 4.647186  | -1.594535 | 0.265526  |
| H  | 5.193223  | 0.455729  | -0.053754 |
| H  | 3.802627  | -3.545418 | 0.558748  |
| H  | 5.666809  | -1.926042 | 0.417156  |
| C  | 0.031958  | 1.682738  | -0.332515 |
| C  | -0.691346 | 2.364660  | 0.647697  |
| C  | 0.654141  | 2.458923  | -1.317159 |
| C  | -0.786580 | 3.751783  | 0.654110  |
| H  | -1.205828 | 1.806895  | 1.419504  |
| C  | 0.587589  | 3.844038  | -1.307379 |
| H  | 1.189114  | 1.959880  | -2.118753 |
| C  | -0.138151 | 4.496687  | -0.318518 |
| H  | -1.364676 | 4.250377  | 1.422599  |
| H  | 1.088604  | 4.414917  | -2.079518 |
| H  | -0.204209 | 5.577440  | -0.313244 |
| H  | 0.104419  | -0.103908 | -2.058179 |
| C  | -4.164682 | -1.089732 | -0.237820 |
| H  | -4.422889 | -0.777112 | -1.249619 |
| H  | -4.679493 | -2.037045 | -0.047237 |
| H  | -4.589782 | -0.341352 | 0.423592  |
| C  | -2.824954 | -0.455110 | 2.304660  |
| H  | -2.850095 | 0.620422  | 2.501674  |
| H  | -3.844708 | -0.816890 | 2.237269  |
| H  | -2.372786 | -0.930304 | 3.174599  |

H<sub>2</sub>SiPh<sub>2</sub>-NHC 3, DE<sub>c</sub> = -1137.41764511 (Hartrees)

M06-2X/def2-TZVP optimized geometry (Å).

|     |           |           |           |
|-----|-----------|-----------|-----------|
| 0 1 |           |           |           |
| C   | 1.077175  | -0.060531 | -1.602425 |
| C   | 2.960497  | -0.556959 | -0.149546 |
| C   | 2.254561  | -0.977061 | 0.919258  |
| H   | 1.141361  | -1.037698 | -2.105150 |
| H   | 0.745050  | 0.667355  | -2.347371 |
| C   | 3.229217  | 0.956048  | -2.074086 |
| H   | 4.148908  | 1.330936  | -1.628949 |
| H   | 3.488037  | 0.259983  | -2.885367 |
| H   | 2.708005  | 1.804518  | -2.520253 |
| C   | 0.450026  | -0.435601 | 2.511563  |
| H   | 0.367280  | -1.413289 | 2.994893  |
| H   | 1.095662  | 0.199767  | 3.124971  |
| H   | -0.545042 | 0.013641  | 2.514286  |
| N   | 2.371420  | 0.368794  | -1.064369 |
| N   | 0.931949  | -0.521992 | 1.141878  |
| Si  | -0.103476 | -0.040443 | -0.147637 |
| C   | -0.785873 | 1.685359  | 0.118847  |
| C   | -2.077526 | 1.920324  | 0.594808  |
| C   | 0.031201  | 2.792281  | -0.138083 |
| C   | -2.542101 | 3.212957  | 0.804576  |
| H   | -2.734083 | 1.082256  | 0.803908  |
| C   | -0.429573 | 4.084915  | 0.063336  |
| H   | 1.045692  | 2.632237  | -0.490278 |
| C   | -1.719175 | 4.296562  | 0.535330  |
| H   | -3.546146 | 3.373236  | 1.177045  |
| H   | 0.216179  | 4.928957  | -0.144781 |
| H   | -2.080500 | 5.304844  | 0.694406  |
| C   | -1.539400 | -1.234082 | -0.326831 |
| C   | -1.497536 | -2.477351 | 0.307095  |
| C   | -2.643819 | -0.946946 | -1.135155 |
| C   | -2.521767 | -3.401681 | 0.146963  |
| H   | -0.646142 | -2.723489 | 0.933588  |
| C   | -3.667880 | -1.867809 | -1.304956 |
| H   | -2.709248 | 0.013962  | -1.636100 |
| C   | -3.607970 | -3.097212 | -0.661047 |
| H   | -2.471832 | -4.359218 | 0.650174  |
| H   | -4.514206 | -1.626987 | -1.936016 |
| H   | -4.407135 | -3.816317 | -0.789310 |
| C   | 2.738785  | -1.982860 | 1.925892  |
| H   | 2.808983  | -1.541587 | 2.922801  |
| H   | 2.035257  | -2.817722 | 1.994548  |
| H   | 3.714593  | -2.387134 | 1.684083  |
| C   | 4.344862  | -1.037714 | -0.489427 |
| H   | 4.659875  | -1.863121 | 0.138347  |
| H   | 4.395243  | -1.378270 | -1.526101 |
| H   | 5.087058  | -0.244108 | -0.375703 |



**Cartesian coordinates for optimized insertion pathway compounds H<sub>2</sub>SiPh<sub>2</sub>-NHC 4**

H<sub>2</sub>SiPh<sub>2</sub>-NHC 4, A

E<sub>c</sub> = -1977.91887395 (Hartrees)

M06-2X/def2-TZVP optimized geometry (Å).

|    |           |           |           |
|----|-----------|-----------|-----------|
| Si | -1.125747 | 0.054654  | -0.021089 |
| C  | -2.240330 | -1.491792 | -0.220576 |
| C  | -2.768782 | -2.146143 | 0.894041  |
| C  | -2.566159 | -1.992347 | -1.481465 |
| C  | -3.594905 | -3.254002 | 0.759499  |
| H  | -2.527469 | -1.770945 | 1.884319  |
| C  | -3.383332 | -3.105997 | -1.628784 |
| H  | -2.172715 | -1.492451 | -2.360426 |
| C  | -3.901054 | -3.737815 | -0.506105 |
| H  | -4.002984 | -3.739328 | 1.637824  |
| H  | -3.620839 | -3.479896 | -2.617384 |
| H  | -4.543136 | -4.603147 | -0.615998 |
| C  | -1.688251 | 1.862534  | 0.253658  |
| C  | -2.145487 | 2.643462  | -0.809666 |
| C  | -1.651448 | 2.449038  | 1.519017  |
| C  | -2.554148 | 3.956723  | -0.622194 |
| H  | -2.183475 | 2.206035  | -1.803129 |
| C  | -2.042802 | 3.767753  | 1.716912  |
| H  | -1.315336 | 1.854760  | 2.362426  |
| C  | -2.497819 | 4.523525  | 0.645126  |
| H  | -2.916137 | 4.539598  | -1.460541 |
| H  | -1.999163 | 4.204841  | 2.707211  |
| H  | -2.810667 | 5.549287  | 0.796566  |
| C  | 0.870642  | -0.158493 | -0.077846 |
| C  | 2.944015  | -0.895533 | 0.302143  |
| C  | 3.042599  | 0.269642  | -0.379351 |
| N  | 1.600877  | -1.140509 | 0.479347  |
| N  | 1.755614  | 0.702188  | -0.612760 |
| C  | 1.398565  | 1.947098  | -1.283121 |
| H  | 1.416123  | 2.771482  | -0.571615 |
| H  | 2.109152  | 2.130819  | -2.084967 |
| H  | 0.396208  | 1.831808  | -1.685727 |
| C  | 1.063220  | -2.303149 | 1.173458  |
| H  | 1.481418  | -3.206636 | 0.734070  |
| H  | 1.324511  | -2.252607 | 2.229174  |
| H  | -0.016447 | -2.300918 | 1.060169  |
| H  | -1.039887 | 0.251139  | -1.563318 |
| H  | -0.963836 | -0.201167 | 1.506302  |
| Cl | 4.423307  | 1.105338  | -0.882585 |
| Cl | 4.161550  | -1.928668 | 0.855863  |

H<sub>2</sub>SiPh<sub>2</sub>-NHC 4, T1

E<sub>c</sub> = -1977.89990154 (Hartrees)

M06-2X/def2-TZVP optimized geometry (Å).

|    |           |           |          |
|----|-----------|-----------|----------|
| Si | -1.024236 | 0.000058  | 0.688548 |
| C  | -1.864550 | -1.598528 | 0.154752 |

|    |           |           |           |
|----|-----------|-----------|-----------|
| C  | -2.435417 | -2.411630 | 1.136059  |
| C  | -2.006477 | -1.985238 | -1.179728 |
| C  | -3.100098 | -3.585324 | 0.802747  |
| H  | -2.356424 | -2.122827 | 2.178668  |
| C  | -2.679903 | -3.149385 | -1.521101 |
| H  | -1.570287 | -1.369755 | -1.958360 |
| C  | -3.222267 | -3.955914 | -0.528422 |
| H  | -3.525387 | -4.207143 | 1.580584  |
| H  | -2.782617 | -3.429253 | -2.562137 |
| H  | -3.744030 | -4.866955 | -0.793326 |
| C  | -1.863695 | 1.599085  | 0.154720  |
| C  | -2.004901 | 1.986155  | -1.179732 |
| C  | -2.434542 | 2.412265  | 1.135979  |
| C  | -2.677590 | 3.150725  | -1.521116 |
| H  | -1.568753 | 1.370595  | -1.958325 |
| C  | -3.098496 | 3.586366  | 0.802658  |
| H  | -2.356093 | 2.123204  | 2.178558  |
| C  | -3.219938 | 3.957316  | -0.528478 |
| H  | -2.779737 | 3.430880  | -2.562132 |
| H  | -3.523772 | 4.208235  | 1.580463  |
| H  | -3.741124 | 4.868685  | -0.793389 |
| C  | 0.854385  | -0.000215 | 0.571930  |
| C  | 2.918223  | -0.671702 | 0.008664  |
| C  | 2.918455  | 0.670626  | 0.008740  |
| N  | 1.683714  | -1.095744 | 0.490932  |
| N  | 1.684088  | 1.095049  | 0.491056  |
| C  | 1.199775  | 2.449588  | 0.355257  |
| H  | 0.458238  | 2.646376  | 1.125482  |
| H  | 2.032890  | 3.137072  | 0.472381  |
| H  | 0.734889  | 2.587648  | -0.626100 |
| C  | 1.198800  | -2.450010 | 0.354720  |
| H  | 0.733329  | -2.587339 | -0.626468 |
| H  | 2.031705  | -3.137889 | 0.471025  |
| H  | 0.457601  | -2.646899 | 1.125252  |
| H  | -0.022710 | -0.000301 | -0.884168 |
| H  | -1.356055 | 0.000077  | 2.161855  |
| Cl | 4.198904  | 1.729686  | -0.317246 |
| Cl | 4.198298  | -1.731182 | -0.317422 |

H<sub>2</sub>SiPh<sub>2</sub>-NHC 4, B

E<sub>c</sub> = -1977.95563189 (Hartrees)

M06-2X/def2-TZVP optimized geometry (Å).

|     |           |          |           |
|-----|-----------|----------|-----------|
| O 1 |           |          |           |
| Si  | 1.010613  | 0.270079 | 1.153055  |
| C   | 0.771986  | 1.898588 | 0.277890  |
| C   | 1.723352  | 2.903244 | 0.480762  |
| C   | -0.279614 | 2.151938 | -0.605303 |
| C   | 1.630261  | 4.122730 | -0.173205 |
| H   | 2.553629  | 2.731498 | 1.158955  |
| C   | -0.375137 | 3.371639 | -1.262772 |
| H   | -1.031408 | 1.393413 | -0.785184 |
| C   | 0.577702  | 4.357237 | -1.047823 |

|    |           |           |           |
|----|-----------|-----------|-----------|
| H  | 2.376341  | 4.888344  | -0.002047 |
| H  | -1.196438 | 3.551960  | -1.944618 |
| H  | 0.500423  | 5.307749  | -1.560597 |
| C  | 2.514670  | -0.608476 | 0.474379  |
| C  | 2.962959  | -0.345373 | -0.822238 |
| C  | 3.168474  | -1.598803 | 1.212799  |
| C  | 4.023805  | -1.055269 | -1.367772 |
| H  | 2.474734  | 0.422959  | -1.411922 |
| C  | 4.229520  | -2.311049 | 0.671880  |
| H  | 2.847624  | -1.817487 | 2.226348  |
| C  | 4.656431  | -2.040370 | -0.621762 |
| H  | 4.358361  | -0.838685 | -2.374409 |
| H  | 4.725915  | -3.074207 | 1.257850  |
| H  | 5.484822  | -2.593566 | -1.046022 |
| C  | -0.524088 | -0.840146 | 0.937731  |
| C  | -2.714171 | -0.528089 | 0.389713  |
| C  | -2.140421 | -1.149623 | -0.638842 |
| N  | -1.752988 | -0.112043 | 1.329784  |
| N  | -0.740287 | -1.216699 | -0.480560 |
| C  | -0.112920 | -2.479876 | -0.842670 |
| H  | -0.483748 | -3.303592 | -0.215851 |
| H  | -0.323121 | -2.700123 | -1.887119 |
| H  | 0.964743  | -2.393607 | -0.716296 |
| C  | -2.085458 | -0.255598 | 2.735555  |
| H  | -2.991074 | 0.305549  | 2.955323  |
| H  | -2.233931 | -1.309401 | 3.012331  |
| H  | -1.272452 | 0.155706  | 3.333005  |
| H  | -0.463882 | -1.774110 | 1.538505  |
| H  | 1.206642  | 0.476434  | 2.609632  |
| Cl | -4.330491 | -0.011194 | 0.519472  |
| Cl | -2.866976 | -1.604393 | -2.109188 |

### H<sub>2</sub>SiPh<sub>2</sub>-NHC 4, T2

E<sub>c</sub> = -1977.90856603 (Hartrees)

M06-2X/def2-TZVP optimized geometry (Å).

|     |           |           |           |
|-----|-----------|-----------|-----------|
| 0 1 |           |           |           |
| Si  | 0.775834  | 0.227546  | 1.250482  |
| C   | -0.347848 | 1.614076  | 0.692022  |
| C   | -0.512142 | 2.030622  | -0.633029 |
| C   | -1.049955 | 2.305172  | 1.683244  |
| C   | -1.349737 | 3.086880  | -0.954049 |
| H   | 0.007448  | 1.510900  | -1.428988 |
| C   | -1.900917 | 3.356441  | 1.366245  |
| H   | -0.931265 | 2.017553  | 2.721714  |
| C   | -2.050964 | 3.749596  | 0.045892  |
| H   | -1.462697 | 3.389201  | -1.987453 |
| H   | -2.442199 | 3.868347  | 2.151812  |
| H   | -2.710201 | 4.570583  | -0.206178 |
| C   | 2.514725  | 0.180630  | 0.564893  |
| C   | 2.944544  | 1.049016  | -0.439332 |
| C   | 3.418189  | -0.774255 | 1.036244  |

|    |           |           |           |
|----|-----------|-----------|-----------|
| C  | 4.224984  | 0.955099  | -0.968153 |
| H  | 2.270717  | 1.809340  | -0.817487 |
| C  | 4.697003  | -0.880141 | 0.505928  |
| H  | 3.127849  | -1.448105 | 1.836509  |
| C  | 5.100861  | -0.016163 | -0.502396 |
| H  | 4.539347  | 1.638628  | -1.746875 |
| H  | 5.379506  | -1.631787 | 0.882250  |
| H  | 6.096973  | -0.095538 | -0.918877 |
| C  | 0.100980  | -1.527611 | 1.244744  |
| C  | -1.878040 | -1.278743 | 0.160984  |
| C  | -1.098874 | -1.002098 | -0.931558 |
| N  | -1.177638 | -1.906573 | 1.198945  |
| N  | 0.227185  | -0.986788 | -0.818512 |
| C  | 1.049688  | -1.357963 | -1.956454 |
| H  | 0.726250  | -2.288685 | -2.431794 |
| H  | 1.035961  | -0.565201 | -2.712199 |
| H  | 2.077154  | -1.469778 | -1.611924 |
| C  | -1.554818 | -3.289017 | 1.499647  |
| H  | -2.621801 | -3.324373 | 1.705745  |
| H  | -1.329547 | -3.933424 | 0.646008  |
| H  | -1.009559 | -3.619959 | 2.380549  |
| H  | 0.782761  | -2.321067 | 1.557663  |
| H  | 0.933121  | 0.494734  | 2.715655  |
| Cl | -3.580961 | -1.137498 | 0.255768  |
| Cl | -1.861650 | -0.670898 | -2.455482 |

### H<sub>2</sub>SiPh<sub>2</sub>-NHC 4, C

E<sub>c</sub> = -1977.92662405 (Hartrees)

M06-2X/def2-TZVP optimized geometry (Å).

|     |           |           |           |
|-----|-----------|-----------|-----------|
| 0 1 |           |           |           |
| C   | -0.522779 | -1.061438 | -1.730632 |
| C   | -2.421707 | -0.800847 | -0.330512 |
| C   | -1.670621 | -0.430596 | 0.777006  |
| H   | -0.176441 | -1.581906 | -2.619030 |
| C   | -2.607115 | -2.032588 | -2.432769 |
| H   | -3.130838 | -2.818245 | -1.894323 |
| H   | -3.334174 | -1.378401 | -2.907389 |
| H   | -1.940267 | -2.454261 | -3.176359 |
| C   | 0.294110  | -0.063481 | 2.085665  |
| H   | -0.112549 | 0.825966  | 2.568921  |
| H   | 0.188109  | -0.911358 | 2.765840  |
| H   | 1.351798  | 0.101977  | 1.899108  |
| N   | -1.790697 | -1.249063 | -1.484794 |
| N   | -0.366511 | -0.323975 | 0.810736  |
| Si  | 0.765237  | 0.032589  | -0.858556 |
| C   | 2.157935  | -1.066109 | -0.193625 |
| C   | 3.487511  | -0.710181 | -0.428565 |
| C   | 1.917048  | -2.268283 | 0.474112  |
| C   | 4.537273  | -1.505454 | 0.010146  |
| H   | 3.706932  | 0.205118  | -0.967598 |
| C   | 2.959908  | -3.082920 | 0.895356  |

|    |           |           |           |
|----|-----------|-----------|-----------|
| H  | 0.894742  | -2.570939 | 0.674943  |
| C  | 4.274223  | -2.697963 | 0.670686  |
| H  | 5.560387  | -1.200040 | -0.170627 |
| H  | 2.747731  | -4.016146 | 1.402326  |
| H  | 5.090361  | -3.326248 | 1.004673  |
| C  | 0.714863  | 1.903425  | -0.467406 |
| C  | -0.232693 | 2.572810  | 0.312310  |
| C  | 1.721374  | 2.684479  | -1.047040 |
| C  | -0.175463 | 3.946565  | 0.510614  |
| H  | -1.048173 | 2.029656  | 0.773325  |
| C  | 1.808319  | 4.051735  | -0.827324 |
| H  | 2.445898  | 2.211660  | -1.700779 |
| C  | 0.853841  | 4.689469  | -0.047596 |
| H  | -0.936999 | 4.435561  | 1.105422  |
| H  | 2.611453  | 4.621270  | -1.278471 |
| H  | 0.906165  | 5.758615  | 0.115232  |
| H  | 1.419062  | 0.272385  | -2.219417 |
| Cl | -4.141977 | -0.737038 | -0.350744 |
| Cl | -2.589330 | -0.111278 | 2.231910  |

#### H<sub>2</sub>SiPh<sub>2</sub>-NHC 4, T3

E<sub>c</sub> = -1977.91714359 (Hartrees)

M06-2X/def2-TZVP optimized geometry (Å).

0 1

|    |           |           |           |
|----|-----------|-----------|-----------|
| C  | -0.224317 | 1.743651  | -1.170787 |
| C  | -2.239676 | 1.190079  | -0.063403 |
| C  | -1.608007 | 0.568023  | 0.974613  |
| H  | 0.296485  | 2.440772  | -1.818236 |
| H  | 0.453185  | 0.359059  | -2.153615 |
| C  | -2.267336 | 2.813111  | -1.942036 |
| H  | -2.866441 | 2.243761  | -2.651904 |
| H  | -2.922640 | 3.457734  | -1.360586 |
| H  | -1.538376 | 3.412030  | -2.480050 |
| C  | 0.280738  | -0.098183 | 2.349447  |
| H  | -0.107315 | 0.409937  | 3.232250  |
| H  | 0.052195  | -1.165302 | 2.431059  |
| H  | 1.362951  | 0.024843  | 2.327321  |
| N  | -1.530898 | 1.913498  | -1.053182 |
| N  | -0.261870 | 0.486808  | 1.130091  |
| Si | 0.623260  | 0.251536  | -0.487208 |
| C  | 0.311047  | -1.607164 | -0.587724 |
| C  | 1.094517  | -2.514989 | 0.131269  |
| C  | -0.764320 | -2.115023 | -1.321164 |
| C  | 0.818023  | -3.876485 | 0.114077  |
| H  | 1.942647  | -2.158950 | 0.708380  |
| C  | -1.060172 | -3.470851 | -1.322944 |
| H  | -1.375676 | -1.441470 | -1.914151 |
| C  | -0.264889 | -4.356676 | -0.608282 |
| H  | 1.447442  | -4.561747 | 0.668390  |
| H  | -1.904525 | -3.838397 | -1.892823 |
| H  | -0.485274 | -5.416539 | -0.619025 |

|    |           |           |           |
|----|-----------|-----------|-----------|
| C  | 2.410731  | 0.676884  | -0.191112 |
| C  | 2.748794  | 1.787448  | 0.586128  |
| C  | 3.441786  | -0.082976 | -0.746633 |
| C  | 4.076433  | 2.130494  | 0.802373  |
| H  | 1.959978  | 2.384578  | 1.033142  |
| C  | 4.770869  | 0.255378  | -0.533750 |
| H  | 3.198482  | -0.948634 | -1.353485 |
| C  | 5.088290  | 1.362971  | 0.241731  |
| H  | 4.323144  | 2.993971  | 1.407321  |
| H  | 5.559260  | -0.342891 | -0.972680 |
| H  | 6.124835  | 1.626975  | 0.409978  |
| Cl | -2.610439 | -0.258644 | 2.134255  |
| Cl | -3.940837 | 1.068201  | -0.310111 |

#### H<sub>2</sub>SiPh<sub>2</sub>-NHC 4, D

E<sub>c</sub> = -1978.00728274 (Hartrees)

M06-2X/def2-TZVP optimized geometry (Å).

0 1

|    |           |           |           |
|----|-----------|-----------|-----------|
| C  | -0.630707 | 0.477418  | 1.676582  |
| C  | -2.571150 | 0.483353  | 0.269541  |
| C  | -2.041211 | -0.130864 | -0.800537 |
| H  | -0.966940 | -0.387855 | 2.264061  |
| H  | -0.070337 | 1.132617  | 2.347938  |
| C  | -2.401140 | 2.157665  | 2.041199  |
| H  | -3.164597 | 2.731666  | 1.519686  |
| H  | -2.867608 | 1.646265  | 2.891943  |
| H  | -1.646800 | 2.848120  | 2.419510  |
| C  | -0.276404 | -0.013851 | -2.488846 |
| H  | -0.448332 | -0.971965 | -2.983861 |
| H  | -0.814746 | 0.763392  | -3.035319 |
| H  | 0.789058  | 0.213474  | -2.536521 |
| N  | -1.760061 | 1.237050  | 1.121915  |
| N  | -0.689794 | -0.045122 | -1.091166 |
| Si | 0.467467  | 0.024055  | 0.207294  |
| C  | 1.701628  | 1.387926  | -0.123732 |
| C  | 3.002978  | 1.139074  | -0.563787 |
| C  | 1.304795  | 2.719354  | 0.044130  |
| C  | 3.882790  | 2.182521  | -0.823745 |
| H  | 3.336619  | 0.117040  | -0.706916 |
| C  | 2.180267  | 3.764124  | -0.210803 |
| H  | 0.291328  | 2.937074  | 0.367378  |
| C  | 3.472494  | 3.495330  | -0.644685 |
| H  | 4.888012  | 1.970161  | -1.165296 |
| H  | 1.856159  | 4.788170  | -0.074938 |
| H  | 4.157587  | 4.309525  | -0.844675 |
| C  | 1.349374  | -1.611321 | 0.402389  |
| C  | 0.850429  | -2.752946 | -0.228716 |
| C  | 2.482615  | -1.744614 | 1.210512  |
| C  | 1.465454  | -3.987353 | -0.063492 |
| H  | -0.032391 | -2.675157 | -0.855632 |
| C  | 3.098523  | -2.975841 | 1.381541  |

|    |           |           |           |
|----|-----------|-----------|-----------|
| H  | 2.895960  | -0.873673 | 1.709518  |
| C  | 2.589629  | -4.098976 | 0.741795  |
| H  | 1.066274  | -4.861733 | -0.561658 |
| H  | 3.975202  | -3.060029 | 2.011288  |
| H  | 3.069865  | -5.060660 | 0.871618  |
| Cl | -2.985753 | -1.205183 | -1.789922 |
| Cl | -4.218485 | 0.193849  | 0.750418  |

**Cartesian coordinates for optimized insertion pathway compounds H<sub>2</sub>SiPh<sub>2</sub>-NHC 5**

H<sub>2</sub>SiPh<sub>2</sub>-NHC 5, A

E<sub>c</sub> = -1212.36862300 (Hartrees)

M06-2X/def2-TZVP optimized geometry (Å).

0 1

|    |           |           |           |
|----|-----------|-----------|-----------|
| Si | -1.066557 | 0.033792  | -0.016580 |
| C  | -2.123706 | -1.558910 | -0.159328 |
| C  | -2.683460 | -2.154323 | 0.972932  |
| C  | -2.367886 | -2.159013 | -1.394979 |
| C  | -3.461820 | -3.300191 | 0.879186  |
| H  | -2.504231 | -1.703074 | 1.944449  |
| C  | -3.131966 | -3.314770 | -1.500092 |
| H  | -1.952536 | -1.704563 | -2.288522 |
| C  | -3.682998 | -3.886146 | -0.361041 |
| H  | -3.896768 | -3.737649 | 1.769753  |
| H  | -3.302159 | -3.768059 | -2.469331 |
| H  | -4.284760 | -4.783456 | -0.438036 |
| C  | -1.687367 | 1.833996  | 0.180536  |
| C  | -2.193475 | 2.548043  | -0.907181 |
| C  | -1.635839 | 2.482848  | 1.414265  |
| C  | -2.635264 | 3.857396  | -0.772394 |
| H  | -2.240588 | 2.061471  | -1.877132 |
| C  | -2.056771 | 3.799716  | 1.557952  |
| H  | -1.262413 | 1.939768  | 2.276403  |
| C  | -2.560648 | 4.488433  | 0.463287  |
| H  | -3.037237 | 4.387326  | -1.627552 |
| H  | -1.998613 | 4.286917  | 2.523905  |
| H  | -2.898389 | 5.511680  | 0.572319  |
| C  | 0.926231  | -0.130629 | -0.054383 |
| C  | 3.015319  | -0.851472 | 0.316966  |
| C  | 3.091209  | 0.353484  | -0.378824 |
| N  | 1.667246  | -1.105954 | 0.500762  |
| N  | 1.782798  | 0.752757  | -0.597731 |
| C  | 1.398625  | 1.980290  | -1.275110 |
| H  | 1.388998  | 2.814803  | -0.574324 |
| H  | 2.111341  | 2.173879  | -2.074763 |
| H  | 0.405180  | 1.848595  | -1.695021 |
| C  | 1.152640  | -2.280436 | 1.181658  |
| H  | 1.399564  | -3.174650 | 0.609538  |
| H  | 1.597953  | -2.345566 | 2.174153  |
| H  | 0.074284  | -2.192177 | 1.273634  |
| H  | -0.978784 | 0.171729  | -1.567684 |
| H  | -0.918444 | -0.148211 | 1.525402  |
| C  | 4.153935  | -1.552677 | 0.689319  |
| C  | 4.312316  | 0.920490  | -0.716915 |
| C  | 5.372061  | -0.991222 | 0.346950  |
| C  | 5.449366  | 0.225215  | -0.342318 |
| H  | 4.092474  | -2.491614 | 1.222850  |
| H  | 6.285675  | -1.501960 | 0.619405  |
| H  | 6.421700  | 0.631068  | -0.586935 |
| H  | 4.376215  | 1.862301  | -1.244532 |

H<sub>2</sub>SiPh<sub>2</sub>-NHC 5, T1E<sub>c</sub> = -1212.35432715 (Hartrees)

M06-2X/def2-TZVP optimized geometry (Å).

|     |           |           |           |
|-----|-----------|-----------|-----------|
| 0 1 |           |           |           |
| Si  | 0.998007  | 0.000050  | -0.644203 |
| C   | 1.809068  | 1.616643  | -0.106145 |
| C   | 1.830030  | 2.067247  | 1.215589  |
| C   | 2.468436  | 2.384630  | -1.068411 |
| C   | 2.470973  | 3.248717  | 1.561087  |
| H   | 1.327612  | 1.485702  | 1.980467  |
| C   | 3.106223  | 3.571962  | -0.731872 |
| H   | 2.479972  | 2.047808  | -2.099453 |
| C   | 3.106045  | 4.007104  | 0.585605  |
| H   | 2.477783  | 3.578870  | 2.592576  |
| H   | 3.604345  | 4.155011  | -1.496507 |
| H   | 3.604503  | 4.930307  | 0.853504  |
| C   | 1.809449  | -1.616374 | -0.106222 |
| C   | 2.468996  | -2.384132 | -1.068549 |
| C   | 1.830521  | -2.067081 | 1.215477  |
| C   | 3.107090  | -3.571326 | -0.732103 |
| H   | 2.480444  | -2.047231 | -2.099565 |
| C   | 2.471742  | -3.248428 | 1.560875  |
| H   | 1.327980  | -1.485713 | 1.980408  |
| C   | 3.107006  | -4.006583 | 0.585335  |
| H   | 3.605362  | -4.154181 | -1.496788 |
| H   | 2.478635  | -3.578660 | 2.592340  |
| H   | 3.605687  | -4.929684 | 0.853166  |
| C   | -0.882786 | -0.000144 | -0.595140 |
| C   | -2.974844 | 0.698598  | -0.124528 |
| C   | -2.974753 | -0.699072 | -0.124394 |
| N   | -1.710502 | 1.095882  | -0.532904 |
| N   | -1.710359 | -1.096269 | -0.532698 |
| C   | -1.268147 | -2.468791 | -0.527820 |
| H   | -0.895228 | -2.758091 | 0.458864  |
| H   | -2.106837 | -3.105415 | -0.804068 |
| H   | -0.469807 | -2.602747 | -1.253965 |
| C   | -1.268526 | 2.468486  | -0.528428 |
| H   | -2.107303 | 3.104873  | -0.804967 |
| H   | -0.895745 | 2.758176  | 0.458191  |
| H   | -0.470145 | 2.602346  | -1.254545 |
| H   | 1.386380  | 0.000147  | -2.107480 |
| H   | 0.002557  | -0.000039 | 0.863116  |
| C   | -4.106124 | 1.418624  | 0.211665  |
| C   | -4.105942 | -1.419170 | 0.211955  |
| C   | -5.248071 | 0.694995  | 0.547252  |
| C   | -5.247982 | -0.695614 | 0.547393  |
| H   | -4.107724 | 2.499905  | 0.224595  |
| H   | -6.148860 | 1.227741  | 0.820542  |
| H   | -6.148701 | -1.228421 | 0.820798  |
| H   | -4.107410 | -2.500449 | 0.225106  |

H<sub>2</sub>SiPh<sub>2</sub>-NHC 5, BE<sub>c</sub> = -1212.40857217 (Hartrees)

M06-2X/def2-TZVP optimized geometry (Å).

|     |           |           |           |
|-----|-----------|-----------|-----------|
| 0 1 |           |           |           |
| Si  | 1.008673  | 0.191745  | 1.122586  |
| C   | 0.833918  | 1.845529  | 0.275123  |
| C   | 1.833963  | 2.802425  | 0.476379  |
| C   | -0.217208 | 2.160294  | -0.589586 |
| C   | 1.788661  | 4.033922  | -0.160420 |
| H   | 2.665345  | 2.582943  | 1.139321  |
| C   | -0.265004 | 3.392248  | -1.229009 |
| H   | -1.005909 | 1.440541  | -0.767937 |
| C   | 0.735695  | 4.329494  | -1.016062 |
| H   | 2.571691  | 4.761987  | 0.009789  |
| H   | -1.087720 | 3.619556  | -1.895017 |
| H   | 0.695528  | 5.289507  | -1.515323 |
| C   | 2.452267  | -0.747397 | 0.390692  |
| C   | 2.908831  | -0.456934 | -0.896903 |
| C   | 3.044913  | -1.810407 | 1.078343  |
| C   | 3.915706  | -1.211025 | -1.484292 |
| H   | 2.468062  | 0.367277  | -1.447366 |
| C   | 4.051025  | -2.567630 | 0.495437  |
| H   | 2.717268  | -2.052937 | 2.084313  |
| C   | 4.485312  | -2.269289 | -0.789808 |
| H   | 4.256764  | -0.972166 | -2.483694 |
| H   | 4.499572  | -3.387525 | 1.042222  |
| H   | 5.271009  | -2.857808 | -1.246525 |
| C   | -0.595495 | -0.831273 | 0.953015  |
| C   | -2.802579 | -0.363997 | 0.482999  |
| C   | -2.272944 | -1.060252 | -0.609557 |
| N   | -1.757328 | -0.016835 | 1.342189  |
| N   | -0.882809 | -1.175240 | -0.452035 |
| C   | -0.266324 | -2.391125 | -0.944128 |
| H   | -0.680471 | -3.279906 | -0.446616 |
| H   | -0.436104 | -2.477714 | -2.016136 |
| H   | 0.808101  | -2.358769 | -0.776872 |
| C   | -2.022436 | 0.101418  | 2.755747  |
| H   | -2.802293 | 0.842901  | 2.921965  |
| H   | -2.341655 | -0.854874 | 3.194947  |
| H   | -1.124267 | 0.441873  | 3.270401  |
| H   | -0.567737 | -1.762967 | 1.563521  |
| H   | 1.275302  | 0.375636  | 2.571582  |
| C   | -4.153700 | -0.102012 | 0.571319  |
| C   | -3.086922 | -1.504891 | -1.628918 |
| C   | -4.979647 | -0.539844 | -0.470748 |
| C   | -4.457065 | -1.227793 | -1.549935 |
| H   | -4.570130 | 0.420638  | 1.422192  |
| H   | -6.042286 | -0.342792 | -0.421747 |
| H   | -5.112417 | -1.566738 | -2.341084 |
| H   | -2.683921 | -2.057343 | -2.467344 |

H<sub>2</sub>SiPh<sub>2</sub>-NHC 5, T2E<sub>c</sub> = -1212.35072804 (Hartrees)

M06-2X/def2-TZVP optimized geometry (Å).

|     |           |           |           |
|-----|-----------|-----------|-----------|
| 0 1 |           |           |           |
| Si  | -0.764978 | 0.043536  | -1.045107 |
| C   | 0.330394  | 1.533258  | -0.698994 |
| C   | 0.591210  | 2.034825  | 0.579256  |
| C   | 0.867321  | 2.224204  | -1.787346 |
| C   | 1.353405  | 3.178005  | 0.764156  |
| H   | 0.198382  | 1.518099  | 1.447576  |
| C   | 1.652606  | 3.356225  | -1.610343 |
| H   | 0.662994  | 1.871369  | -2.791772 |
| C   | 1.893660  | 3.837347  | -0.332682 |
| H   | 1.534137  | 3.552025  | 1.764218  |
| H   | 2.069121  | 3.865519  | -2.470383 |
| H   | 2.498277  | 4.724292  | -0.189645 |
| C   | -2.509423 | 0.043873  | -0.353430 |
| C   | -2.919912 | 0.939090  | 0.635413  |
| C   | -3.447272 | -0.872248 | -0.833090 |
| C   | -4.213276 | 0.909380  | 1.139966  |
| H   | -2.219612 | 1.672905  | 1.020502  |
| C   | -4.738400 | -0.918621 | -0.324248 |
| H   | -3.173889 | -1.559657 | -1.627913 |
| C   | -5.123038 | -0.027329 | 0.667596  |
| H   | -4.512395 | 1.616319  | 1.903956  |
| H   | -5.446510 | -1.643161 | -0.707024 |
| H   | -6.129968 | -0.056534 | 1.064192  |
| C   | -0.079641 | -1.695656 | -1.209926 |
| C   | 1.994645  | -1.377006 | -0.243542 |
| C   | 1.257399  | -0.976907 | 0.901038  |
| N   | 1.201874  | -2.053894 | -1.196691 |
| N   | -0.098652 | -0.962290 | 0.798982  |
| C   | -0.854550 | -1.177786 | 2.018689  |
| H   | -0.415227 | -1.970610 | 2.632872  |
| H   | -0.908274 | -0.264378 | 2.626380  |
| H   | -1.877929 | -1.450619 | 1.766549  |
| C   | 1.592412  | -3.433782 | -1.488265 |
| H   | 1.591947  | -4.029719 | -0.572793 |
| H   | 0.897069  | -3.852057 | -2.212111 |
| H   | 2.591970  | -3.443855 | -1.917143 |
| H   | -0.758768 | -2.499329 | -1.502363 |
| H   | -1.049455 | 0.310421  | -2.510386 |
| C   | 3.379006  | -1.315477 | -0.290184 |
| C   | 2.004837  | -0.625687 | 2.039867  |
| C   | 4.079187  | -0.882415 | 0.820480  |
| C   | 3.383075  | -0.559812 | 1.985599  |
| H   | 3.900637  | -1.613673 | -1.191145 |
| H   | 5.157676  | -0.814282 | 0.790700  |
| H   | 3.930977  | -0.238881 | 2.862746  |
| H   | 1.484115  | -0.351302 | 2.948395  |

H<sub>2</sub>SiPh<sub>2</sub>-NHC 5, CE<sub>c</sub> = -1212.36830005 (Hartrees)

M06-2X/def2-TZVP optimized geometry (Å).

|     |           |           |           |
|-----|-----------|-----------|-----------|
| 0 1 |           |           |           |
| C   | 0.371046  | -1.328855 | 1.565862  |
| C   | 2.442447  | -1.030518 | 0.440052  |
| C   | 1.815759  | -0.480265 | -0.717628 |
| H   | -0.140990 | -1.897773 | 2.340482  |
| C   | 2.278765  | -2.517958 | 2.411139  |
| H   | 2.851842  | -3.256730 | 1.855589  |
| H   | 2.939243  | -1.973279 | 3.083697  |
| H   | 1.499224  | -3.003258 | 2.989018  |
| C   | -0.033043 | 0.111000  | -2.115000 |
| H   | 0.355631  | 1.091857  | -2.406613 |
| H   | 0.212797  | -0.609899 | -2.900832 |
| H   | -1.116285 | 0.196186  | -2.059854 |
| N   | 1.639139  | -1.582641 | 1.474134  |
| N   | 0.472498  | -0.330096 | -0.823337 |
| Si  | -0.669575 | 0.007998  | 0.666704  |
| C   | -2.183434 | -0.939900 | 0.026617  |
| C   | -3.466483 | -0.613354 | 0.472190  |
| C   | -2.061320 | -2.028785 | -0.840849 |
| C   | -4.583464 | -1.322651 | 0.051673  |
| H   | -3.594421 | 0.203597  | 1.172653  |
| C   | -3.170157 | -2.756449 | -1.252807 |
| H   | -1.078512 | -2.309852 | -1.203955 |
| C   | -4.436779 | -2.399406 | -0.811790 |
| H   | -5.567703 | -1.040172 | 0.404017  |
| H   | -3.046533 | -3.600171 | -1.920652 |
| H   | -5.304803 | -2.960536 | -1.134922 |
| C   | -0.566994 | 1.909493  | 0.415580  |
| C   | 0.506129  | 2.584747  | -0.170189 |
| C   | -1.616654 | 2.691870  | 0.906626  |
| C   | 0.529245  | 3.971444  | -0.269087 |
| H   | 1.356929  | 2.028833  | -0.547726 |
| C   | -1.623937 | 4.072833  | 0.778427  |
| H   | -2.442795 | 2.207609  | 1.416300  |
| C   | -0.543268 | 4.719210  | 0.191903  |
| H   | 1.385289  | 4.466066  | -0.711709 |
| H   | -2.463553 | 4.647660  | 1.149730  |
| H   | -0.534555 | 5.798476  | 0.104448  |
| H   | -1.247696 | 0.234978  | 2.089556  |
| C   | 3.830726  | -1.115388 | 0.545558  |
| C   | 2.705362  | -0.113878 | -1.762945 |
| C   | 4.656507  | -0.702550 | -0.476612 |
| C   | 4.071355  | -0.217081 | -1.643532 |
| H   | 4.276946  | -1.509703 | 1.446784  |
| H   | 5.729932  | -0.768328 | -0.372725 |
| H   | 4.694998  | 0.092098  | -2.473037 |
| H   | 2.296761  | 0.278166  | -2.680824 |

H<sub>2</sub>SiPh<sub>2</sub>-NHC 5, T3E<sub>c</sub> = -1212.36698576 (Hartrees)

M06-2X/def2-TZVP optimized geometry (Å).

| 0 1 |           |           |           |
|-----|-----------|-----------|-----------|
| C   | -0.465946 | -1.670582 | -1.176134 |
| C   | -2.558627 | -1.026044 | -0.238555 |
| C   | -1.942972 | -0.324422 | 0.841497  |
| H   | 0.042809  | -2.325416 | -1.879880 |
| C   | -2.469880 | -2.551251 | -2.193835 |
| H   | -3.166391 | -3.245480 | -1.726221 |
| H   | -3.014426 | -1.900133 | -2.879628 |
| H   | -1.722558 | -3.107173 | -2.750965 |
| C   | -0.086045 | 0.411782  | 2.207068  |
| H   | -0.314377 | 1.484029  | 2.205738  |
| H   | -0.504942 | -0.039554 | 3.109370  |
| H   | 0.997579  | 0.301057  | 2.248615  |
| N   | -1.779294 | -1.761498 | -1.176671 |
| N   | -0.574449 | -0.272741 | 1.020472  |
| Si  | 0.490835  | -0.224633 | -0.441358 |
| C   | 2.149578  | -0.993080 | -0.051659 |
| C   | 3.325038  | -0.544024 | -0.657284 |
| C   | 2.234746  | -2.066184 | 0.838203  |
| C   | 4.544646  | -1.151045 | -0.389985 |
| H   | 3.283923  | 0.294065  | -1.345130 |
| C   | 3.452337  | -2.672198 | 1.117402  |
| H   | 1.331445  | -2.426948 | 1.320898  |
| C   | 4.608836  | -2.215264 | 0.499739  |
| H   | 5.445629  | -0.793667 | -0.872686 |
| H   | 3.500451  | -3.500406 | 1.813348  |
| H   | 5.560009  | -2.687312 | 0.712015  |
| C   | 0.710233  | 1.674746  | -0.486554 |
| C   | -0.225557 | 2.459616  | -1.166206 |
| C   | 1.737522  | 2.340656  | 0.187551  |
| C   | -0.151695 | 3.845243  | -1.166743 |
| H   | -1.027719 | 1.977370  | -1.718212 |
| C   | 1.830036  | 3.727819  | 0.178886  |
| H   | 2.486981  | 1.770309  | 0.727219  |
| C   | 0.882948  | 4.484455  | -0.495267 |
| H   | -0.894383 | 4.427099  | -1.698673 |
| H   | 2.643278  | 4.218034  | 0.700377  |
| H   | 0.951962  | 5.564910  | -0.501982 |
| H   | 0.322059  | -0.214553 | -2.068222 |
| C   | -3.944014 | -1.020464 | -0.379464 |
| C   | -2.817436 | 0.325702  | 1.733403  |
| C   | -4.767975 | -0.367847 | 0.519076  |
| C   | -4.190333 | 0.301250  | 1.585092  |
| H   | -4.400718 | -1.538183 | -1.209082 |
| H   | -5.839867 | -0.385268 | 0.381740  |
| H   | -4.808665 | 0.821852  | 2.304991  |
| H   | -2.400203 | 0.876709  | 2.561405  |

H<sub>2</sub>SiPh<sub>2</sub>-NHC 5, DE<sub>c</sub> = -1212.45761558 (Hartrees)

M06-2X/def2-TZVP optimized geometry (Å).

| 0 1 |           |           |           |
|-----|-----------|-----------|-----------|
| C   | -0.613830 | 0.275119  | 1.714823  |
| C   | -2.670629 | 0.329982  | 0.434483  |
| C   | -2.149461 | -0.281529 | -0.738070 |
| H   | -0.874300 | -0.660665 | 2.231808  |
| H   | -0.046077 | 0.884192  | 2.422110  |
| C   | -2.421342 | 1.744385  | 2.399813  |
| H   | -3.188555 | 2.419636  | 2.022235  |
| H   | -2.872979 | 1.077342  | 3.148916  |
| H   | -1.655082 | 2.340637  | 2.894758  |
| C   | -0.350470 | -0.517765 | -2.380954 |
| H   | -0.433750 | -1.582912 | -2.623374 |
| H   | -0.933822 | 0.050028  | -3.109887 |
| H   | 0.697366  | -0.234397 | -2.495418 |
| N   | -1.804250 | 1.024653  | 1.305570  |
| N   | -0.782481 | -0.212149 | -1.028534 |
| Si  | 0.430031  | -0.006330 | 0.187790  |
| C   | 1.513598  | 1.475463  | -0.170793 |
| C   | 2.727389  | 1.375008  | -0.855316 |
| C   | 1.082521  | 2.748102  | 0.219008  |
| C   | 3.487489  | 2.502734  | -1.138175 |
| H   | 3.089541  | 0.402550  | -1.172350 |
| C   | 1.840656  | 3.876768  | -0.055040 |
| H   | 0.130855  | 2.855691  | 0.730225  |
| C   | 3.045856  | 3.754540  | -0.734701 |
| H   | 4.424665  | 2.403942  | -1.671326 |
| H   | 1.491123  | 4.852778  | 0.257087  |
| H   | 3.637721  | 4.634614  | -0.952766 |
| C   | 1.482393  | -1.548070 | 0.318676  |
| C   | 0.948391  | -2.777896 | -0.076290 |
| C   | 2.762503  | -1.536872 | 0.879031  |
| C   | 1.669327  | -3.954591 | 0.073460  |
| H   | -0.050147 | -2.815193 | -0.500925 |
| C   | 3.486820  | -2.710718 | 1.034995  |
| H   | 3.202598  | -0.598025 | 1.198795  |
| C   | 2.941051  | -3.920840 | 0.628688  |
| H   | 1.239945  | -4.897265 | -0.241780 |
| H   | 4.477298  | -2.681638 | 1.471389  |
| H   | 3.505553  | -4.837321 | 0.745554  |
| C   | -3.034801 | -0.910161 | -1.610610 |
| C   | -4.040724 | 0.263786  | 0.665871  |
| C   | -4.908025 | -0.360394 | -0.225043 |
| C   | -4.402563 | -0.948439 | -1.365270 |
| H   | -4.452393 | 0.711779  | 1.558110  |
| H   | -5.968687 | -0.381484 | -0.013384 |
| H   | -5.058683 | -1.439535 | -2.071789 |
| H   | -2.652404 | -1.375336 | -2.507816 |

**Cartesian coordinates for optimized insertion pathway compounds H<sub>2</sub>BMe-NHC 1**

H<sub>2</sub>BMe-NHC 1, A

E<sub>c</sub> = -370.775939198 (Hartrees)

M06-2X/def2-TZVP optimized geometry (Å).

0 1

|   |           |           |           |
|---|-----------|-----------|-----------|
| C | 1.871024  | 0.675349  | -0.291540 |
| C | 1.871115  | -0.675113 | -0.291550 |
| C | -0.192211 | -0.000023 | 0.280139  |
| H | 2.651819  | 1.381457  | -0.509694 |
| H | 2.651996  | -1.381112 | -0.509757 |
| N | 0.597201  | -1.067515 | 0.056317  |
| N | 0.597056  | 1.067581  | 0.056330  |
| C | 0.147679  | -2.443027 | 0.188427  |
| H | 0.865095  | -3.091107 | -0.309850 |
| H | 0.068631  | -2.713245 | 1.240008  |
| H | -0.830554 | -2.546170 | -0.273067 |
| C | 0.147370  | 2.443040  | 0.188422  |
| H | -0.830874 | 2.546072  | -0.273074 |
| H | 0.068291  | 2.713269  | 1.239999  |
| H | 0.864716  | 3.091190  | -0.309864 |
| C | -2.619639 | -0.000155 | -0.722506 |
| H | -3.689178 | -0.000172 | -0.501551 |
| H | -2.426416 | 0.877297  | -1.349939 |
| H | -2.426383 | -0.877615 | -1.349915 |
| B | -1.753768 | -0.000107 | 0.668478  |
| H | -1.955110 | 0.997246  | 1.333709  |
| H | -1.955012 | -0.997467 | 1.333727  |

H<sub>2</sub>BMe-NHC 1, T1

E<sub>c</sub> = -370.721299439 (Hartrees)

M06-2X/def2-TZVP optimized geometry (Å).

0 1

|   |           |           |           |
|---|-----------|-----------|-----------|
| C | -1.013356 | -1.672846 | -0.075911 |
| C | -1.930241 | -0.705692 | -0.071186 |
| C | 0.098518  | 0.299827  | -0.034574 |
| H | -1.145287 | -2.741416 | -0.061869 |
| H | -3.004357 | -0.781064 | -0.050570 |
| N | -1.298394 | 0.529876  | -0.289941 |
| N | 0.260410  | -1.106838 | -0.292721 |
| C | -1.892644 | 1.735478  | 0.228528  |
| H | -1.525328 | 2.606253  | -0.311477 |
| H | -2.972550 | 1.679153  | 0.100604  |
| H | -1.668157 | 1.870318  | 1.298225  |
| C | 1.399491  | -1.769366 | 0.297007  |
| H | 1.490684  | -1.533812 | 1.369523  |
| H | 1.275531  | -2.845896 | 0.188511  |

|   |          |           |           |
|---|----------|-----------|-----------|
| H | 2.319432 | -1.481140 | -0.205541 |
| B | 1.168330 | 1.395035  | -0.074869 |
| H | 0.281141 | 0.477334  | 1.149845  |
| H | 0.743232 | 2.498572  | 0.069938  |
| C | 2.719630 | 1.136178  | -0.123074 |
| H | 3.292990 | 2.061038  | -0.086881 |
| H | 3.056521 | 0.510258  | 0.706631  |
| H | 2.991990 | 0.602490  | -1.038687 |

H<sub>2</sub>BMe-NHC 1, B

E<sub>c</sub> = -370.742402361 (Hartrees)

M06-2X/def2-TZVP optimized geometry (Å).

0 1

|   |           |           |           |
|---|-----------|-----------|-----------|
| C | -0.243875 | 0.549217  | -1.332028 |
| C | 0.983634  | 0.046255  | -1.228754 |
| C | 0.154924  | -0.028783 | 0.904622  |
| H | -0.790860 | 0.854788  | -2.207861 |
| H | 1.688786  | -0.119138 | -2.030083 |
| N | 1.309823  | -0.329144 | 0.067754  |
| N | -0.879269 | 0.580958  | -0.042836 |
| C | 2.607552  | 0.068752  | 0.576645  |
| H | 2.807790  | -0.451323 | 1.512660  |
| H | 3.376455  | -0.215722 | -0.141430 |
| H | 2.671883  | 1.151586  | 0.752522  |
| C | -1.525393 | 1.839251  | 0.319419  |
| H | -0.814043 | 2.665254  | 0.250784  |
| H | -2.362074 | 2.018603  | -0.356596 |
| H | -1.906502 | 1.754636  | 1.334294  |
| B | -1.205474 | -0.812791 | 0.742401  |
| H | 0.393621  | 0.622142  | 1.744398  |
| H | -2.023557 | -0.585214 | 1.588501  |
| C | -1.309590 | -2.133380 | -0.129385 |
| H | -1.340719 | -3.001622 | 0.533847  |
| H | -2.226061 | -2.162248 | -0.724769 |
| H | -0.464734 | -2.278361 | -0.805808 |

H<sub>2</sub>BMe-NHC 1, T2

E<sub>c</sub> = -370.734022201 (Hartrees)

M06-2X/def2-TZVP optimized geometry (Å).

0 1

|   |           |           |           |
|---|-----------|-----------|-----------|
| C | -0.242724 | -0.606591 | 1.223488  |
| C | 0.951495  | 0.000119  | 1.205034  |
| C | 0.350304  | 0.270996  | -0.994728 |
| N | 1.384252  | 0.341144  | -0.081033 |
| N | -0.922510 | -0.610684 | 0.005969  |
| C | 2.681898  | -0.209692 | -0.455295 |
| H | 3.002032  | 0.223655  | -1.400914 |
| H | 3.412832  | 0.053958  | 0.308219  |



|   |           |           |           |
|---|-----------|-----------|-----------|
| H | 2.641529  | -1.300934 | -0.545594 |
| C | -1.718771 | -1.782541 | -0.325044 |
| H | -1.174837 | -2.704267 | -0.112502 |
| H | -2.651763 | -1.771629 | 0.245804  |
| H | -1.968772 | -1.744355 | -1.382500 |
| B | -1.106501 | 0.797864  | -0.713136 |
| H | 0.627275  | -0.220550 | -1.927336 |
| H | -1.826514 | 0.631513  | -1.663931 |
| C | -1.395458 | 2.069139  | 0.206864  |
| H | -1.419211 | 2.971733  | -0.409035 |
| H | -2.371382 | 1.997549  | 0.695833  |
| H | -0.648301 | 2.234000  | 0.986675  |
| H | -0.690492 | -1.077166 | 2.087357  |
| H | 1.607457  | 0.155371  | 2.047141  |

### H<sub>2</sub>BMe-NHC 1, C

$E_c = -370.770615993$  (Hartrees)

M06-2X/def2-TZVP optimized geometry (Å).

0 1

|   |           |           |           |
|---|-----------|-----------|-----------|
| C | -1.086987 | -1.250778 | 0.276081  |
| C | 0.256063  | -1.486319 | 0.212909  |
| C | -0.784678 | 0.999951  | -0.395312 |
| H | -1.815747 | -1.992433 | 0.545538  |
| H | 0.599390  | -2.488940 | 0.452968  |
| N | 1.167207  | -0.590373 | -0.122189 |
| N | -1.570508 | 0.031033  | -0.051822 |
| C | 2.560599  | -0.961507 | -0.187550 |
| H | 2.687238  | -2.036879 | -0.053958 |
| H | 2.968297  | -0.671804 | -1.160433 |
| H | 3.137348  | -0.440994 | 0.581176  |
| C | -3.023150 | 0.179619  | 0.009718  |
| H | -3.294506 | 1.197909  | -0.251297 |
| H | -3.481104 | -0.521189 | -0.687375 |
| H | -3.360168 | -0.050041 | 1.019840  |
| H | -1.307627 | 1.924656  | -0.630101 |
| B | 0.814748  | 0.901807  | -0.468271 |
| H | 1.160705  | 1.149527  | -1.615214 |
| C | 1.490404  | 1.959327  | 0.567542  |
| H | 2.579318  | 1.983566  | 0.472114  |
| H | 1.145145  | 2.979367  | 0.372271  |
| H | 1.257577  | 1.731850  | 1.613575  |

### H<sub>2</sub>BMe-NHC 1, T3

$E_c = -370.753449855$  (Hartrees)

M06-2X/def2-TZVP optimized geometry (Å).

0 1

|   |           |           |           |
|---|-----------|-----------|-----------|
| C | 1.180890  | -1.238123 | -0.168555 |
| C | -0.124916 | -1.540057 | -0.142827 |

|   |           |           |           |
|---|-----------|-----------|-----------|
| C | 0.717601  | 1.074585  | -0.082787 |
| H | 1.947427  | -1.990243 | -0.255595 |
| H | -0.402774 | -2.588690 | -0.171814 |
| N | -1.148301 | -0.628842 | -0.142080 |
| N | 1.632552  | 0.116654  | -0.164209 |
| C | -2.456408 | -1.099782 | 0.255600  |
| H | -2.577036 | -1.131694 | 1.347564  |
| H | -3.223533 | -0.439597 | -0.147560 |
| H | -2.634093 | -2.103172 | -0.136959 |
| C | 3.015382  | 0.333291  | 0.214591  |
| H | 3.266177  | 1.383515  | 0.082726  |
| H | 3.177071  | 0.048990  | 1.259261  |
| H | 3.667522  | -0.269205 | -0.417840 |
| H | 1.116773  | 2.081836  | 0.006719  |
| B | -0.774057 | 0.811192  | 0.077262  |
| H | -0.185938 | 1.043740  | 1.290843  |
| C | -1.870089 | 1.940866  | -0.151154 |
| H | -1.453654 | 2.943845  | -0.038003 |
| H | -2.288190 | 1.866610  | -1.159829 |
| H | -2.703985 | 1.858740  | 0.548981  |

### H<sub>2</sub>BMe-NHC 1, D

$E_c = -370.811407916$  (Hartrees)

M06-2X/def2-TZVP optimized geometry (Å).

0 1

|   |           |           |           |
|---|-----------|-----------|-----------|
| H | 0.972062  | 2.012364  | -0.463968 |
| H | 0.935625  | 1.444766  | 1.192655  |
| C | 0.733233  | 1.135244  | 0.146509  |
| C | 1.159321  | -1.242027 | -0.002107 |
| C | -0.132602 | -1.557618 | 0.110578  |
| H | 1.912167  | -2.017295 | 0.044507  |
| H | -0.452245 | -2.579722 | 0.247137  |
| N | -1.147539 | -0.574492 | 0.016991  |
| N | 1.613980  | 0.042445  | -0.242663 |
| C | -2.496950 | -1.099488 | -0.064140 |
| H | -2.603640 | -1.750945 | -0.935332 |
| H | -2.740103 | -1.682955 | 0.828327  |
| H | -3.211377 | -0.285274 | -0.151955 |
| C | 3.016758  | 0.302659  | -0.027562 |
| H | 3.245157  | 0.481111  | 1.034054  |
| H | 3.614039  | -0.539053 | -0.377797 |
| H | 3.313042  | 1.190273  | -0.589000 |
| B | -0.811142 | 0.785438  | 0.021719  |
| C | -1.892478 | 1.934956  | -0.029868 |
| H | -2.387986 | 1.963287  | -1.005390 |
| H | -2.680429 | 1.799819  | 0.715047  |
| H | -1.449379 | 2.918406  | 0.132371  |

**Cartesian coordinates for optimized insertion pathway compounds H<sub>2</sub>BMe-NHC 2**

H<sub>2</sub>BMe-NHC 2, A

E<sub>c</sub> = -371.971495483 (Hartrees)

M06-2X/def2-TZVP optimized geometry (Å).

0 1

|   |           |           |           |
|---|-----------|-----------|-----------|
| C | -2.008461 | -0.359371 | 0.217088  |
| C | -1.136472 | -1.609687 | 0.339044  |
| C | 0.187639  | 0.183880  | -0.328853 |
| H | -2.577062 | -0.141588 | 1.121553  |
| H | -1.002652 | -1.922400 | 1.379764  |
| N | 0.134575  | -1.147480 | -0.206399 |
| N | -1.015916 | 0.679600  | -0.034993 |
| C | 1.270712  | -2.036577 | -0.221320 |
| H | 1.544705  | -2.327093 | 0.797319  |
| H | 1.024890  | -2.935761 | -0.788808 |
| H | 2.108267  | -1.527642 | -0.688313 |
| C | -1.427333 | 2.059044  | -0.121592 |
| H | -0.556340 | 2.673237  | -0.324341 |
| H | -2.158876 | 2.189850  | -0.923957 |
| H | -1.885001 | 2.367014  | 0.820863  |
| C | 2.329181  | 1.179767  | 0.750682  |
| H | 3.260650  | 1.726671  | 0.590733  |
| H | 1.759163  | 1.735551  | 1.502718  |
| H | 2.600824  | 0.220303  | 1.205260  |
| B | 1.523547  | 1.022698  | -0.667193 |
| H | 1.213178  | 2.093275  | -1.141047 |
| H | 2.154916  | 0.384196  | -1.484597 |
| H | -2.706745 | -0.418223 | -0.623467 |
| H | -1.519862 | -2.458060 | -0.228269 |

H<sub>2</sub>BMe-NHC 2, T1

E<sub>c</sub> = -371.937585183 (Hartrees)

M06-2X/def2-TZVP optimized geometry (Å).

0 1

|   |           |           |           |
|---|-----------|-----------|-----------|
| C | 1.103906  | -1.595438 | -0.175119 |
| C | 2.058605  | -0.419440 | -0.094193 |
| C | -0.170826 | 0.293593  | -0.207922 |
| H | 1.425820  | -2.457856 | 0.408027  |
| H | 2.487658  | -0.360873 | 0.914168  |
| N | 1.191533  | 0.733432  | -0.348036 |
| N | -0.115191 | -1.015151 | 0.373320  |
| C | 1.566964  | 1.902825  | 0.423813  |
| H | 1.436385  | 1.742918  | 1.504804  |
| H | 2.617348  | 2.128292  | 0.234779  |
| H | 0.979349  | 2.765339  | 0.119287  |
| C | -1.277447 | -1.856811 | 0.215741  |

|   |           |           |           |
|---|-----------|-----------|-----------|
| H | -2.111989 | -1.479999 | 0.801724  |
| H | -1.590914 | -1.929518 | -0.839925 |
| H | -1.037559 | -2.859199 | 0.570151  |
| C | -2.853140 | 0.927279  | 0.050260  |
| H | -3.511919 | 1.757785  | -0.199717 |
| H | -3.226511 | 0.046696  | -0.475607 |
| H | -2.968835 | 0.720091  | 1.118270  |
| B | -1.347539 | 1.255056  | -0.294146 |
| H | -0.631289 | 0.192834  | -1.316694 |
| H | -1.059895 | 2.305105  | -0.781531 |
| H | 0.953445  | -1.908727 | -1.222172 |
| H | 2.873829  | -0.478184 | -0.817309 |

H<sub>2</sub>BMe-NHC 2, B

E<sub>c</sub> = -371.962992000 (Hartrees)

M06-2X/def2-TZVP optimized geometry (Å).

0 1

|   |           |           |           |
|---|-----------|-----------|-----------|
| C | 0.019457  | -0.229489 | 1.379548  |
| C | 0.736537  | 1.057856  | 0.917935  |
| C | 0.126456  | -0.016927 | -1.015592 |
| H | -0.769341 | -0.030555 | 2.105618  |
| H | 0.048223  | 1.898375  | 0.930311  |
| N | 1.168716  | 0.790210  | -0.450591 |
| N | -0.531760 | -0.793465 | 0.145387  |
| C | 2.464086  | 0.118366  | -0.483200 |
| H | 2.730335  | -0.097507 | -1.517306 |
| H | 3.226352  | 0.778162  | -0.068365 |
| H | 2.477517  | -0.829017 | 0.078353  |
| C | -0.635919 | -2.242644 | 0.091142  |
| H | 0.333747  | -2.705785 | 0.296483  |
| H | -1.366317 | -2.593272 | 0.822437  |
| H | -0.974799 | -2.532259 | -0.900600 |
| B | -1.427796 | 0.172109  | -0.800785 |
| H | 0.485524  | -0.679531 | -1.797316 |
| H | -2.071913 | -0.526854 | -1.533120 |
| C | -2.158084 | 1.447470  | -0.160670 |
| H | -3.198795 | 1.494956  | -0.483695 |
| H | -2.178236 | 1.437683  | 0.933629  |
| H | -1.689060 | 2.387890  | -0.460682 |
| H | 1.589897  | 1.299403  | 1.549563  |
| H | 0.721957  | -0.947252 | 1.810061  |

H<sub>2</sub>BMe-NHC 2, T2E<sub>c</sub> = -371.948201475 (Hartrees)

M06-2X/def2-TZVP optimized geometry (Å).

0 1

|   |           |           |           |
|---|-----------|-----------|-----------|
| C | -0.934964 | 0.359287  | 1.193108  |
| C | 0.188213  | -0.722682 | 1.204928  |
| C | -0.482593 | 0.555737  | -1.065406 |
| H | -0.523224 | 1.323885  | 1.470793  |
| H | -0.243315 | -1.717908 | 1.371057  |
| N | 0.890032  | -0.696859 | -0.040765 |
| N | -1.440487 | 0.440522  | -0.165606 |
| C | 1.652747  | -1.871804 | -0.372673 |
| H | 1.967309  | -1.812854 | -1.413465 |
| H | 2.557984  | -1.971387 | 0.243331  |
| H | 1.058405  | -2.783031 | -0.235156 |
| C | -2.673710 | -0.280575 | -0.447209 |
| H | -2.915768 | -0.178888 | -1.502291 |
| H | -2.556283 | -1.341884 | -0.207379 |
| H | -3.488056 | 0.131946  | 0.147295  |
| H | -0.806601 | 0.283987  | -2.070861 |
| B | 1.094278  | 0.688777  | -0.717096 |
| H | 1.688591  | 0.528038  | -1.758760 |
| C | 1.722103  | 1.899700  | 0.150624  |
| H | 1.374818  | 1.991877  | 1.183719  |
| H | 2.807877  | 1.780378  | 0.204771  |
| H | 1.542668  | 2.865419  | -0.330976 |
| H | 0.828154  | -0.493894 | 2.068956  |
| H | -1.741537 | 0.106815  | 1.878809  |

H<sub>2</sub>BMe-NHC 2, CE<sub>c</sub> = -371.966589942 (Hartrees)

M06-2X/def2-TZVP optimized geometry (Å).

0 1

|   |           |           |           |
|---|-----------|-----------|-----------|
| C | -1.085032 | -1.287304 | 0.163303  |
| C | 0.380388  | -1.283515 | 0.559304  |
| C | -0.771068 | 1.042827  | -0.353067 |
| H | -1.708391 | -1.718157 | 0.950251  |
| H | 0.696754  | -2.330048 | 0.635604  |
| N | 1.154232  | -0.587767 | -0.428816 |
| N | -1.585192 | 0.076963  | -0.084199 |
| C | 2.566541  | -0.863586 | -0.308018 |
| H | 3.105879  | -0.324125 | -1.088727 |
| H | 2.990902  | -0.553956 | 0.662105  |
| H | 2.767699  | -1.933120 | -0.432891 |
| C | -3.033872 | 0.219786  | -0.030250 |
| H | -3.310414 | 1.238409  | -0.288547 |
| H | -3.490634 | -0.474439 | -0.736843 |
| H | -3.389308 | -0.017525 | 0.972903  |
| H | -1.265138 | 2.005010  | -0.491773 |

|   |           |           |           |
|---|-----------|-----------|-----------|
| B | 0.800798  | 0.904503  | -0.502480 |
| H | 1.018588  | 1.372071  | -1.614061 |
| C | 1.495524  | 1.868829  | 0.633886  |
| H | 1.117171  | 2.894583  | 0.605733  |
| H | 1.352166  | 1.499066  | 1.655086  |
| H | 2.572494  | 1.927753  | 0.461323  |
| H | 0.470917  | -0.852737 | 1.576546  |
| H | -1.230845 | -1.861891 | -0.754152 |

H<sub>2</sub>BMe-NHC 2, T3E<sub>c</sub> = -371.964351842 (Hartrees)

M06-2X/def2-TZVP optimized geometry (Å).

0 1

|   |           |           |           |
|---|-----------|-----------|-----------|
| C | 1.204302  | -1.255265 | 0.001090  |
| C | -0.236442 | -1.428921 | -0.447960 |
| C | 0.709654  | 1.092518  | -0.030800 |
| H | 1.882799  | -1.822018 | -0.642260 |
| H | -0.486938 | -2.489692 | -0.337317 |
| N | -1.122141 | -0.618163 | 0.343408  |
| N | 1.616858  | 0.148691  | -0.041841 |
| C | -2.506311 | -1.001429 | 0.194874  |
| H | -3.128549 | -0.414231 | 0.870145  |
| H | -2.896243 | -0.855454 | -0.826224 |
| H | -2.641440 | -2.057405 | 0.451098  |
| C | 3.042585  | 0.390719  | 0.078036  |
| H | 3.236254  | 1.459191  | 0.024677  |
| H | 3.411370  | 0.006689  | 1.032349  |
| H | 3.575121  | -0.115256 | -0.728607 |
| H | 1.112439  | 2.103198  | -0.072079 |
| B | -0.788145 | 0.856349  | 0.300331  |
| H | -0.365531 | 1.301809  | 1.432361  |
| C | -1.857381 | 1.903261  | -0.292569 |
| H | -1.465695 | 2.923690  | -0.307935 |
| H | -2.141891 | 1.648361  | -1.318295 |
| H | -2.776605 | 1.926335  | 0.295855  |
| H | -0.294954 | -1.200739 | -1.530207 |
| H | 1.319127  | -1.615216 | 1.027803  |

H<sub>2</sub>BMe-NHC 2, DE<sub>c</sub> = -372.027668000 (Hartrees)

M06-2X/def2-TZVP optimized geometry (Å).

0 1

|   |           |           |           |
|---|-----------|-----------|-----------|
| H | 0.902190  | 1.977363  | -0.725661 |
| H | 0.996768  | 1.597256  | 0.983029  |
| C | 0.731464  | 1.168510  | -0.006743 |
| C | 1.179981  | -1.135904 | 0.387575  |
| C | -0.183616 | -1.601701 | -0.081009 |
| H | 1.903129  | -1.936140 | 0.215712  |

|   |           |           |           |
|---|-----------|-----------|-----------|
| H | -0.515628 | -2.429064 | 0.555878  |
| N | -1.174610 | -0.536448 | -0.021459 |
| N | 1.599353  | 0.046283  | -0.335373 |
| C | -2.535173 | -1.023871 | -0.107829 |
| H | -2.674842 | -1.612366 | -1.020601 |
| H | -2.774536 | -1.668325 | 0.743904  |
| H | -3.237588 | -0.194454 | -0.124839 |
| C | 2.991759  | 0.355574  | -0.095935 |
| H | 3.195191  | 0.565842  | 0.968433  |
| H | 3.622917  | -0.477547 | -0.409760 |
| H | 3.273307  | 1.237611  | -0.672485 |
| B | -0.810579 | 0.812290  | 0.022189  |
| C | -1.881092 | 1.974912  | 0.100262  |
| H | -2.426133 | 2.063736  | -0.844860 |
| H | -2.630332 | 1.809829  | 0.878015  |
| H | -1.414269 | 2.942689  | 0.289999  |
| H | -0.110078 | -1.985421 | -1.105175 |
| H | 1.149667  | -0.946425 | 1.477358  |

**Cartesian coordinates for optimized insertion pathway compounds H<sub>2</sub>BMe-NHC 3**

H<sub>2</sub>BMe-NHC 3, A

E<sub>c</sub> = -449.403400934 (Hartrees)

M06-2X/def2-TZVP optimized geometry (Å).

|     |           |           |           |
|-----|-----------|-----------|-----------|
| 0 1 |           |           |           |
| C   | -1.295005 | 0.676857  | 0.041387  |
| C   | -1.295150 | -0.676641 | 0.041418  |
| C   | 0.825548  | -0.000128 | -0.350986 |
| N   | 0.015202  | -1.065837 | -0.198819 |
| N   | 0.015431  | 1.065765  | -0.198855 |
| C   | 0.452160  | -2.448145 | -0.222041 |
| H   | 0.315382  | -2.900556 | 0.760448  |
| H   | -0.121812 | -3.009715 | -0.959012 |
| H   | 1.504100  | -2.462934 | -0.487907 |
| C   | 0.452705  | 2.447974  | -0.222107 |
| H   | 1.504668  | 2.462508  | -0.487900 |
| H   | -0.121069 | 3.009640  | -0.959159 |
| H   | 0.315963  | 2.900462  | 0.760350  |
| C   | 3.136580  | -0.000091 | 0.900791  |
| H   | 4.224386  | -0.000135 | 0.801104  |
| H   | 2.873445  | 0.878533  | 1.500931  |
| H   | 2.873389  | -0.878567 | 1.501121  |
| B   | 2.426322  | -0.000262 | -0.572754 |
| H   | 2.712074  | 0.987449  | -1.219886 |
| H   | 2.711986  | -0.988195 | -1.219585 |
| C   | -2.392073 | -1.660267 | 0.234332  |
| H   | -2.544996 | -2.269389 | -0.659092 |
| H   | -2.179431 | -2.335872 | 1.065132  |
| H   | -3.324671 | -1.143690 | 0.451197  |
| C   | -2.391705 | 1.660731  | 0.234307  |
| H   | -2.179043 | 2.336100  | 1.065295  |
| H   | -2.544277 | 2.270083  | -0.659017 |
| H   | -3.324490 | 1.144360  | 0.450860  |

H<sub>2</sub>BMe-NHC 3, T1

E<sub>c</sub> = -449.348250781 (Hartrees)

M06-2X/def2-TZVP optimized geometry (Å).

|     |           |           |           |
|-----|-----------|-----------|-----------|
| 0 1 |           |           |           |
| C   | 1.483529  | 0.315958  | -0.047116 |
| C   | 1.042046  | -0.947432 | -0.049128 |
| C   | -0.789187 | 0.402177  | -0.039552 |
| N   | -0.360465 | -0.946809 | -0.283027 |
| N   | 0.390195  | 1.183543  | -0.285006 |
| C   | -1.148038 | -1.995519 | 0.320997  |
| H   | -2.126054 | -2.056516 | -0.148015 |
| H   | -0.650743 | -2.952518 | 0.178023  |
| H   | -1.284196 | -1.826652 | 1.402597  |

|   |           |           |           |
|---|-----------|-----------|-----------|
| C | 0.412547  | 2.526589  | 0.237217  |
| H | 0.176242  | 2.549631  | 1.313848  |
| H | 1.398164  | 2.960999  | 0.083903  |
| H | -0.315409 | 3.144707  | -0.283948 |
| B | -2.213432 | 0.964080  | -0.089578 |
| H | -1.042137 | 0.496993  | 1.141760  |
| H | -2.278486 | 2.144862  | 0.054974  |
| C | -3.532907 | 0.107083  | -0.145172 |
| H | -4.424540 | 0.732251  | -0.151431 |
| H | -3.552472 | -0.524009 | -1.038478 |
| H | -3.616559 | -0.567808 | 0.710174  |
| C | 1.801286  | -2.225092 | -0.033503 |
| H | 2.871974  | -2.033005 | -0.029813 |
| H | 1.568623  | -2.831251 | 0.845065  |
| H | 1.564100  | -2.821272 | -0.919214 |
| C | 2.872903  | 0.842947  | -0.022797 |
| H | 3.073266  | 1.440663  | -0.916445 |
| H | 3.053280  | 1.478676  | 0.847012  |
| H | 3.590934  | 0.026444  | 0.008430  |

### H<sub>2</sub>BMe-NHC 3, B

E<sub>c</sub> = -449.370819922 (Hartrees)

M06-2X/def2-TZVP optimized geometry (Å).

|     |           |           |           |
|-----|-----------|-----------|-----------|
| 0 1 |           |           |           |
| C   | 0.223313  | 0.992136  | -0.153320 |
| C   | -1.019672 | 0.571134  | 0.098609  |
| C   | 0.178141  | -1.351059 | -0.314247 |
| N   | -1.137553 | -0.825324 | 0.021421  |
| N   | 1.071991  | -0.135568 | -0.463837 |
| C   | -2.242290 | -1.360663 | -0.752166 |
| H   | -2.254754 | -2.445046 | -0.650227 |
| H   | -3.185567 | -0.980591 | -0.362336 |
| H   | -2.170215 | -1.107985 | -1.820665 |
| C   | 1.913878  | -0.013591 | -1.649873 |
| H   | 1.313336  | 0.275148  | -2.516314 |
| H   | 2.690769  | 0.730714  | -1.473488 |
| H   | 2.390617  | -0.974000 | -1.830856 |
| B   | 1.389854  | -1.237455 | 0.693776  |
| H   | 0.174941  | -1.983201 | -1.200180 |
| H   | 2.373448  | -1.848508 | 0.383139  |
| C   | 1.171516  | -0.792370 | 2.202336  |
| H   | 1.216683  | -1.674118 | 2.846828  |
| H   | 1.950067  | -0.110204 | 2.554607  |
| H   | 0.202164  | -0.320020 | 2.377386  |
| C   | 0.854195  | 2.331770  | -0.031680 |
| H   | 1.242681  | 2.689919  | -0.988174 |
| H   | 0.135570  | 3.064417  | 0.329413  |
| H   | 1.689985  | 2.294156  | 0.673261  |
| C   | -2.200667 | 1.380474  | 0.509257  |
| H   | -2.970852 | 1.378872  | -0.264762 |
| H   | -2.638899 | 0.962884  | 1.417921  |
| H   | -1.920803 | 2.414098  | 0.698979  |

### H<sub>2</sub>BMe-NHC 3, T2

E<sub>c</sub> = -449.358840608 (Hartrees)

M06-2X/def2-TZVP optimized geometry (Å).

|     |           |           |           |
|-----|-----------|-----------|-----------|
| 0 1 |           |           |           |
| C   | 0.265034  | 0.919656  | -0.116692 |
| C   | -0.981049 | 0.527715  | 0.218863  |
| C   | -0.076084 | -1.542117 | -0.264084 |
| N   | -1.229722 | -0.829658 | -0.085540 |
| N   | 1.136708  | -0.116062 | -0.478345 |
| C   | -2.341605 | -1.065224 | -1.001176 |
| H   | -2.448876 | -2.135952 | -1.161415 |
| H   | -3.266194 | -0.696948 | -0.559886 |
| H   | -2.180309 | -0.564521 | -1.962686 |
| C   | 2.135159  | 0.130505  | -1.504709 |
| H   | 1.700281  | 0.618778  | -2.379517 |
| H   | 2.946864  | 0.752630  | -1.114050 |
| H   | 2.558757  | -0.825472 | -1.803002 |
| B   | 1.245395  | -1.308985 | 0.561569  |
| H   | -0.122932 | -2.246809 | -1.094310 |
| H   | 2.123593  | -2.047366 | 0.190907  |
| C   | 1.235660  | -0.941786 | 2.118633  |
| H   | 1.246256  | -1.857251 | 2.715747  |
| H   | 2.127389  | -0.374878 | 2.403045  |
| H   | 0.363930  | -0.364233 | 2.437171  |
| C   | 0.803793  | 2.313312  | -0.076304 |
| H   | 1.146372  | 2.626506  | -1.064497 |
| H   | 0.047741  | 3.022649  | 0.249495  |
| H   | 1.658400  | 2.376200  | 0.602161  |
| C   | -2.093744 | 1.354570  | 0.774698  |
| H   | -1.727943 | 2.311277  | 1.138765  |
| H   | -2.870685 | 1.555330  | 0.032794  |
| H   | -2.561518 | 0.835241  | 1.613247  |

### H<sub>2</sub>BMe-NHC 3, C

E<sub>c</sub> = -449.383347504 (Hartrees)

M06-2X/def2-TZVP optimized geometry (Å).

|     |           |           |           |
|-----|-----------|-----------|-----------|
| 0 1 |           |           |           |
| C   | 0.892196  | 0.657272  | 0.156275  |
| C   | -0.444124 | 0.936355  | -0.042002 |
| C   | 0.567060  | -1.613561 | -0.488453 |
| N   | -1.306123 | -0.021243 | -0.414582 |
| N   | 1.361542  | -0.604966 | -0.294822 |
| C   | -2.662613 | 0.311530  | -0.797402 |
| H   | -2.708965 | 1.138015  | -1.509051 |
| H   | -3.100769 | -0.567395 | -1.264855 |
| H   | -3.282455 | 0.571951  | 0.068406  |
| C   | 2.779631  | -0.681874 | -0.659600 |
| H   | 2.981402  | -1.668003 | -1.065662 |
| H   | 3.005596  | 0.080901  | -1.403253 |

|   |           |           |           |
|---|-----------|-----------|-----------|
| H | 3.401741  | -0.516778 | 0.217344  |
| H | 1.047581  | -2.468235 | -0.958930 |
| B | -0.977460 | -1.517060 | -0.083272 |
| H | -1.633487 | -2.237265 | -0.805764 |
| C | -1.186025 | -1.858906 | 1.494630  |
| H | -2.228926 | -1.710289 | 1.791802  |
| H | -0.938341 | -2.899758 | 1.723122  |
| H | -0.570508 | -1.227274 | 2.145375  |
| C | 1.915456  | 1.568019  | 0.767498  |
| H | 2.479000  | 1.056579  | 1.553016  |
| H | 2.642000  | 1.970665  | 0.054132  |
| H | 1.435266  | 2.412251  | 1.251246  |
| C | -0.971657 | 2.337876  | 0.103203  |
| H | -1.336467 | 2.695600  | -0.860768 |
| H | -1.814635 | 2.359980  | 0.796101  |
| H | -0.218218 | 3.037551  | 0.445024  |

H<sub>2</sub>BMe-NHC 3, T3

E<sub>c</sub> = -449.367447563 (Hartrees)

M06-2X/def2-TZVP optimized geometry (Å).

|     |           |           |           |
|-----|-----------|-----------|-----------|
| 0 1 |           |           |           |
| C   | -1.199960 | 0.431260  | -0.084615 |
| C   | -0.028293 | 1.108085  | -0.040614 |
| C   | -0.061588 | -1.673734 | -0.110183 |
| N   | 1.217953  | 0.492956  | -0.037361 |
| N   | -1.206588 | -1.018877 | -0.053392 |
| C   | 2.355683  | 1.221788  | 0.489490  |
| H   | 3.257267  | 0.650771  | 0.279921  |
| H   | 2.479886  | 2.199549  | 0.024744  |
| H   | 2.296413  | 1.363776  | 1.578845  |
| C   | -2.401969 | -1.682595 | 0.448814  |
| H   | -2.243659 | -2.757410 | 0.409459  |
| H   | -2.590396 | -1.389518 | 1.486222  |
| H   | -3.275365 | -1.434167 | -0.149756 |
| H   | -0.149613 | -2.756751 | -0.076853 |
| B   | 1.298043  | -1.007154 | 0.017088  |
| H   | 0.945464  | -1.508466 | 1.213986  |
| C   | 2.633081  | -1.751773 | -0.442994 |
| H   | 2.490458  | -2.833594 | -0.496989 |
| H   | 2.937647  | -1.410021 | -1.436994 |
| H   | 3.475034  | -1.579123 | 0.229638  |
| C   | 0.005512  | 2.611692  | -0.074522 |
| H   | 0.496549  | 2.997387  | 0.820184  |
| H   | 0.585523  | 2.951430  | -0.935777 |
| H   | -0.978429 | 3.059557  | -0.123488 |
| C   | -2.556959 | 1.014098  | -0.348815 |
| H   | -2.994608 | 0.567532  | -1.247760 |
| H   | -3.257770 | 0.840268  | 0.471866  |
| H   | -2.517208 | 2.083067  | -0.516787 |

H<sub>2</sub>BMe-NHC 3, D

E<sub>c</sub> = -449.424821857 (Hartrees)

M06-2X/def2-TZVP optimized geometry (Å).

|     |           |           |           |
|-----|-----------|-----------|-----------|
| 0 1 |           |           |           |
| H   | -0.091356 | -2.693352 | 0.021352  |
| H   | -0.316398 | -1.760639 | 1.494607  |
| C   | -0.108422 | -1.670979 | 0.408963  |
| C   | -1.177228 | 0.447180  | -0.056152 |
| C   | -0.014503 | 1.116156  | 0.073592  |
| N   | 1.225863  | 0.409782  | -0.046186 |
| N   | -1.178006 | -0.945334 | -0.268007 |
| C   | 2.378195  | 1.190985  | -0.470928 |
| H   | 2.171398  | 1.700105  | -1.415362 |
| H   | 2.662187  | 1.944429  | 0.266145  |
| H   | 3.224050  | 0.527342  | -0.624173 |
| C   | -2.436606 | -1.657390 | -0.204451 |
| H   | -2.819570 | -1.744852 | 0.824578  |
| H   | -3.198847 | -1.188671 | -0.822002 |
| H   | -2.277217 | -2.666694 | -0.584518 |
| B   | 1.284587  | -0.976899 | 0.145389  |
| C   | 2.624693  | -1.811772 | 0.084336  |
| H   | 2.922435  | -1.980851 | -0.956133 |
| H   | 3.466302  | -1.321784 | 0.577439  |
| H   | 2.500223  | -2.796825 | 0.537061  |
| C   | -2.520779 | 1.117248  | -0.068934 |
| H   | -3.000762 | 0.976345  | -1.040396 |
| H   | -3.189396 | 0.699721  | 0.686403  |
| H   | -2.447060 | 2.184854  | 0.097995  |
| C   | 0.114507  | 2.578062  | 0.391495  |
| H   | 0.753117  | 2.716285  | 1.268131  |
| H   | 0.565354  | 3.146446  | -0.425977 |
| H   | -0.841540 | 3.034562  | 0.619737  |

**Cartesian coordinates for optimized insertion pathway compounds H<sub>2</sub>BMe-NHC 4**

H<sub>2</sub>BMe-NHC 4, A

E<sub>c</sub> = -1289.97003752 (Hartrees)

M06-2X/def2-TZVP optimized geometry (Å).

0 1

|    |           |           |           |
|----|-----------|-----------|-----------|
| C  | -0.859344 | 0.674844  | -0.028379 |
| C  | -0.859284 | -0.674886 | -0.028375 |
| C  | 1.256370  | 0.000073  | -0.351505 |
| N  | 0.446361  | -1.073203 | -0.223713 |
| N  | 0.446269  | 1.073276  | -0.223699 |
| C  | 0.878602  | -2.461194 | -0.241189 |
| H  | 0.618396  | -2.935019 | 0.704035  |
| H  | 0.389602  | -2.989437 | -1.058172 |
| H  | 1.953847  | -2.465820 | -0.382898 |
| C  | 0.878388  | 2.461307  | -0.241134 |
| H  | 1.953636  | 2.466029  | -0.382812 |
| H  | 0.389364  | 2.989524  | -1.058119 |
| H  | 0.618113  | 2.935089  | 0.704091  |
| C  | 3.536807  | 0.000020  | 0.950876  |
| H  | 4.625812  | 0.000012  | 0.869475  |
| H  | 3.263804  | 0.878474  | 1.546064  |
| H  | 3.263785  | -0.878477 | 1.545992  |
| B  | 2.861789  | 0.000108  | -0.537451 |
| H  | 3.150649  | 0.988467  | -1.178813 |
| H  | 3.150649  | -0.988167 | -1.178944 |
| Cl | -2.144909 | 1.757488  | 0.156688  |
| Cl | -2.144752 | -1.757647 | 0.156693  |

H<sub>2</sub>BMe-NHC 4, T1

E<sub>c</sub> = -1289.92256608 (Hartrees)

M06-2X/def2-TZVP optimized geometry (Å).

0 1

|   |           |           |          |
|---|-----------|-----------|----------|
| C | -1.012748 | 0.526692  | 0.014913 |
| C | -0.674752 | -0.763737 | 0.017412 |
| C | 1.237372  | 0.427567  | 0.086429 |
| N | 0.703036  | -0.890791 | 0.291398 |
| N | 0.121027  | 1.308105  | 0.292119 |

|   |          |           |           |
|---|----------|-----------|-----------|
| C | 1.428354 | -1.997590 | -0.295816 |
| H | 0.818111 | -2.895036 | -0.232264 |
| H | 1.664847 | -1.800829 | -1.352294 |
| H | 2.350843 | -2.170224 | 0.250745  |
| C | 0.221792 | 2.657034  | -0.216318 |
| H | 0.951142 | 3.214149  | 0.366221  |
| H | 0.532308 | 2.665485  | -1.271346 |

|    |           |           |           |
|----|-----------|-----------|-----------|
| H  | -0.746093 | 3.142663  | -0.122707 |
| C  | 3.947048  | -0.083323 | 0.109823  |
| H  | 3.966018  | -0.672657 | 1.031061  |
| H  | 3.948219  | -0.798056 | -0.715279 |
| H  | 4.878485  | 0.477560  | 0.052131  |
| B  | 2.695282  | 0.873086  | 0.083068  |
| H  | 2.835472  | 2.046483  | -0.056992 |
| H  | 1.553607  | 0.517481  | -1.097063 |
| Cl | -2.575682 | 1.191102  | 0.001800  |
| Cl | -1.711389 | -2.109544 | 0.018739  |

H<sub>2</sub>BMe-NHC 4, B

E<sub>c</sub> = -1289.94495467 (Hartrees)

M06-2X/def2-TZVP optimized geometry (Å).

0 1

|    |           |           |           |
|----|-----------|-----------|-----------|
| C  | 0.227945  | 0.662176  | -0.243631 |
| C  | -0.918747 | 0.018880  | -0.021878 |
| C  | 0.647750  | -1.621913 | -0.165594 |
| N  | -0.782040 | -1.363405 | 0.000764  |
| N  | 1.307642  | -0.258654 | -0.400822 |
| C  | -1.669477 | -2.126619 | -0.866914 |
| H  | -1.518598 | -3.186803 | -0.672268 |
| H  | -2.702700 | -1.878494 | -0.632670 |
| H  | -1.481331 | -1.923862 | -1.929374 |
| C  | 2.181162  | -0.065396 | -1.557510 |
| H  | 1.592483  | -0.033599 | -2.476740 |
| H  | 2.733359  | 0.865800  | -1.437904 |
| H  | 2.883666  | -0.894292 | -1.587808 |
| B  | 1.723999  | -1.176948 | 0.897903  |
| H  | 0.850511  | -2.317645 | -0.975789 |
| H  | 2.821789  | -1.611597 | 0.700545  |
| C  | 1.318089  | -0.627807 | 2.327557  |
| H  | 1.499717  | -1.406470 | 3.072505  |
| H  | 1.920162  | 0.234739  | 2.623251  |
| H  | 0.265294  | -0.349351 | 2.413059  |
| Cl | 0.545970  | 2.329089  | -0.172831 |
| Cl | -2.421494 | 0.747664  | 0.312943  |

H<sub>2</sub>BMe-NHC 4, T2

E<sub>c</sub> = -1289.93611234 (Hartrees)

M06-2X/def2-TZVP optimized geometry (Å).

0 1

|   |           |           |           |
|---|-----------|-----------|-----------|
| C | 0.291487  | 0.605627  | -0.205557 |
| C | -0.890855 | 0.014689  | 0.039478  |
| C | 0.415353  | -1.837220 | -0.140405 |
| N | -0.881312 | -1.368589 | -0.149915 |
| N | 1.367941  | -0.254252 | -0.380392 |
| C | -1.798656 | -1.870066 | -1.173585 |

|    |           |           |           |
|----|-----------|-----------|-----------|
| H  | -1.756078 | -2.956738 | -1.177448 |
| H  | -2.812129 | -1.563051 | -0.925548 |
| H  | -1.534775 | -1.482276 | -2.162937 |
| C  | 2.392000  | 0.079235  | -1.360858 |
| H  | 1.949335  | 0.448397  | -2.286676 |
| H  | 3.066380  | 0.836528  | -0.954964 |
| H  | 2.966546  | -0.821477 | -1.562163 |
| B  | 1.567459  | -1.312264 | 0.801407  |
| H  | 0.603167  | -2.580119 | -0.914584 |
| H  | 2.593716  | -1.902039 | 0.587172  |
| C  | 1.307880  | -0.804986 | 2.290247  |
| H  | 1.400310  | -1.642080 | 2.986374  |
| H  | 2.052156  | -0.063363 | 2.593109  |
| H  | 0.321075  | -0.364721 | 2.454211  |
| Cl | 0.546263  | 2.297363  | -0.220032 |
| Cl | -2.334302 | 0.813723  | 0.477246  |

### H<sub>2</sub>BMe-NHC 4, C

$E_c = -1289.96605728$  (Hartrees)

M06-2X/def2-TZVP optimized geometry (Å).

0 1

|    |           |           |           |
|----|-----------|-----------|-----------|
| C  | 0.825479  | 0.181368  | -0.005503 |
| C  | -0.474311 | 0.604880  | -0.133172 |
| C  | 0.206295  | -2.048036 | -0.442222 |
| N  | -1.478539 | -0.218032 | -0.378571 |
| N  | 1.137806  | -1.145383 | -0.374186 |
| C  | -2.775214 | 0.273896  | -0.806787 |
| H  | -2.683488 | 1.037696  | -1.579029 |
| H  | -3.330268 | -0.572763 | -1.202831 |
| H  | -3.334952 | 0.696476  | 0.032285  |
| C  | 2.526100  | -1.432296 | -0.758560 |
| H  | 2.565691  | -2.445256 | -1.145247 |
| H  | 2.848518  | -0.721251 | -1.516128 |
| H  | 3.170512  | -1.339006 | 0.112143  |
| H  | 0.549091  | -2.995398 | -0.849815 |
| B  | -1.295023 | -1.734870 | 0.026655  |
| H  | -2.068000 | -2.394843 | -0.628831 |
| C  | -1.450431 | -1.964588 | 1.624216  |
| H  | -2.455758 | -1.691841 | 1.957791  |
| H  | -1.297966 | -3.011717 | 1.900585  |
| H  | -0.741541 | -1.367201 | 2.207631  |
| Cl | -0.793477 | 2.304941  | 0.010767  |
| Cl | 2.116471  | 1.185177  | 0.517447  |

### H<sub>2</sub>BMe-NHC 4, T3

$E_c = -1289.95120614$  (Hartrees)

M06-2X/def2-TZVP optimized geometry (Å).

0 1

|    |           |           |           |
|----|-----------|-----------|-----------|
| C  | -0.924837 | -0.204049 | 0.030987  |
| C  | -0.011498 | 0.786296  | 0.054600  |
| C  | 0.746789  | -1.859926 | -0.141056 |
| N  | 1.336296  | 0.599239  | 0.079236  |
| N  | -0.523869 | -1.576400 | 0.089437  |
| C  | 2.177428  | 1.505277  | 0.842684  |
| H  | 3.198257  | 1.421229  | 0.475437  |
| H  | 1.856163  | 2.537605  | 0.725869  |
| H  | 2.173573  | 1.251327  | 1.910662  |
| C  | -1.441543 | -2.543083 | 0.682775  |
| H  | -0.960565 | -3.517618 | 0.675028  |
| H  | -1.667051 | -2.257097 | 1.712362  |
| H  | -2.368945 | -2.588654 | 0.117620  |
| H  | 0.980729  | -2.920954 | -0.163180 |
| B  | 1.860965  | -0.817450 | -0.104080 |
| H  | 1.848952  | -1.458671 | 1.051015  |
| C  | 3.267309  | -1.041580 | -0.815610 |
| H  | 3.508421  | -2.102088 | -0.915682 |
| H  | 3.255430  | -0.609669 | -1.820051 |
| H  | 4.093599  | -0.577885 | -0.274548 |
| Cl | -0.581532 | 2.424055  | -0.099467 |
| Cl | -2.582719 | 0.040194  | -0.375893 |

### H<sub>2</sub>BMe-NHC 4, D

$E_c = -1290.00888543$  (Hartrees)

M06-2X/def2-TZVP optimized geometry (Å).

0 1

|    |           |           |           |
|----|-----------|-----------|-----------|
| H  | 0.960919  | -2.858796 | 0.181813  |
| H  | 0.424200  | -1.947190 | 1.587834  |
| C  | 0.643923  | -1.865287 | 0.507563  |
| C  | -0.927850 | -0.181859 | -0.114612 |
| C  | -0.004857 | 0.789352  | -0.042329 |
| N  | 1.369486  | 0.479118  | -0.119041 |
| N  | -0.552955 | -1.510963 | -0.257412 |
| C  | 2.258592  | 1.527194  | -0.608635 |
| H  | 1.864762  | 1.956170  | -1.530745 |
| H  | 2.372555  | 2.328223  | 0.122113  |
| H  | 3.232269  | 1.092530  | -0.814311 |
| C  | -1.564090 | -2.544470 | -0.332046 |
| H  | -2.046037 | -2.727499 | 0.637341  |
| H  | -2.328845 | -2.285817 | -1.059968 |
| H  | -1.078193 | -3.464393 | -0.655518 |
| B  | 1.800165  | -0.824124 | 0.201722  |
| C  | 3.316790  | -1.247422 | 0.202081  |
| H  | 3.650667  | -1.447523 | -0.822026 |
| H  | 3.983330  | -0.485476 | 0.608725  |
| H  | 3.473648  | -2.168568 | 0.765110  |
| Cl | -2.611336 | 0.183113  | 0.018391  |
| Cl | -0.421656 | 2.433759  | 0.271848  |



**Cartesian coordinates for optimized insertion pathway compounds H<sub>2</sub>BMe-NHC 5**

H<sub>2</sub>BMe-NHC 5, A

E<sub>c</sub> = -524.420718352 (Hartrees)

M06-2X/def2-TZVP optimized geometry (Å).

0 1

|   |           |           |           |
|---|-----------|-----------|-----------|
| C | 0.835818  | -0.696519 | -0.066353 |
| C | 0.836134  | 0.696456  | -0.066197 |
| C | -1.286820 | 0.000479  | -0.346525 |
| N | -0.482074 | 1.081340  | -0.237637 |
| N | -0.482537 | -1.080775 | -0.237963 |
| C | -0.914016 | 2.464309  | -0.248403 |
| H | -0.639874 | 2.939546  | 0.693888  |
| H | -0.436243 | 2.994237  | -1.072938 |
| H | -1.991280 | 2.484404  | -0.374051 |
| C | -0.915220 | -2.463503 | -0.248831 |
| H | -1.992145 | -2.483042 | -0.377516 |
| H | -0.435393 | -2.994245 | -1.071637 |
| H | -0.644104 | -2.938290 | 0.694569  |
| C | -3.502213 | -0.000685 | 1.035753  |
| H | -4.593531 | -0.000789 | 0.998343  |
| H | -3.204018 | -0.879954 | 1.617178  |
| H | -3.204237 | 0.877608  | 1.618754  |
| B | -2.890867 | 0.000744  | -0.483383 |
| H | -3.210624 | -0.988402 | -1.108487 |
| H | -3.210550 | 0.991012  | -1.106724 |
| C | 2.006208  | 1.423448  | 0.088507  |
| C | 2.005547  | -1.424058 | 0.088267  |
| C | 3.177865  | -0.699653 | 0.242066  |
| C | 3.178194  | 0.698476  | 0.242203  |
| H | 2.004911  | -2.505715 | 0.089621  |
| H | 4.114023  | -1.227031 | 0.366014  |
| H | 4.114596  | 1.225394  | 0.366260  |
| H | 2.006085  | 2.505105  | 0.089918  |

H<sub>2</sub>BMe-NHC 5, T1

E<sub>c</sub> = -524.377570854 (Hartrees)

M06-2X/def2-TZVP optimized geometry (Å).

0 1

|   |           |           |           |
|---|-----------|-----------|-----------|
| C | -0.956717 | -0.668465 | -0.122088 |
| C | -0.739996 | 0.716820  | -0.134499 |
| C | 1.289240  | -0.308050 | -0.006038 |
| N | 0.630727  | 0.935098  | -0.305477 |
| N | 0.278237  | -1.292918 | -0.289266 |
| C | 1.218145  | 2.178965  | 0.120070  |
| H | 2.167610  | 2.342312  | -0.382703 |
| H | 0.552207  | 2.995754  | -0.149401 |
| H | 1.379671  | 2.203686  | 1.208017  |

|   |           |           |           |
|---|-----------|-----------|-----------|
| C | 0.478380  | -2.661515 | 0.104468  |
| H | 0.654579  | -2.754586 | 1.185996  |
| H | -0.405951 | -3.238286 | -0.157346 |
| H | 1.329976  | -3.086178 | -0.422639 |
| B | 2.789693  | -0.610223 | 0.009912  |
| H | 1.523155  | -0.347366 | 1.174194  |
| H | 3.047107  | -1.764911 | 0.148163  |
| C | 3.943404  | 0.459611  | 0.037331  |
| H | 3.772671  | 1.257383  | 0.761832  |
| H | 4.910566  | 0.011511  | 0.259056  |
| H | 4.020678  | 0.945020  | -0.941386 |
| C | -1.791163 | 1.601000  | -0.025158 |
| C | -2.227855 | -1.187398 | 0.001758  |
| C | -3.083572 | 1.075819  | 0.092110  |
| C | -3.296997 | -0.290309 | 0.105643  |
| H | -1.633134 | 2.670953  | -0.025167 |
| H | -3.922248 | 1.752972  | 0.182984  |
| H | -4.302213 | -0.676857 | 0.207729  |
| H | -2.403103 | -2.254433 | 0.022736  |

H<sub>2</sub>BMe-NHC 5, B

E<sub>c</sub> = -524.394862141 (Hartrees)

M06-2X/def2-TZVP optimized geometry (Å).

0 1

|   |           |           |           |
|---|-----------|-----------|-----------|
| C | 0.354712  | -0.647892 | -0.173098 |
| C | 0.605405  | 0.711180  | 0.021625  |
| C | -1.670314 | 0.535280  | -0.325928 |
| N | -0.567655 | 1.444272  | -0.041160 |
| N | -1.041183 | -0.849310 | -0.420462 |
| C | -0.579292 | 2.731895  | -0.697888 |
| H | -1.527891 | 3.229194  | -0.499592 |
| H | 0.214504  | 3.357617  | -0.294177 |
| H | -0.443078 | 2.646035  | -1.784981 |
| C | -1.389666 | -1.714324 | -1.544037 |
| H | -0.850313 | -1.406430 | -2.442346 |
| H | -1.138759 | -2.746013 | -1.299062 |
| H | -2.462503 | -1.649329 | -1.706953 |
| B | -2.144566 | -0.514053 | 0.753765  |
| H | -2.225249 | 0.806309  | -1.223250 |
| H | -3.152599 | -1.107065 | 0.494790  |
| C | -1.604388 | -0.463959 | 2.242777  |
| H | -2.361740 | -0.010476 | 2.887459  |
| H | -1.411676 | -1.462837 | 2.642239  |
| H | -0.691628 | 0.124695  | 2.358792  |
| C | 1.354483  | -1.591421 | -0.153112 |
| C | 1.906416  | 1.142929  | 0.239267  |
| C | 2.660366  | -1.157253 | 0.076186  |
| C | 2.922959  | 0.192108  | 0.265442  |
| H | 1.135559  | -2.639494 | -0.312082 |
| H | 3.467359  | -1.875995 | 0.108090  |
| H | 3.940922  | 0.516988  | 0.437737  |
| H | 2.127702  | 2.191070  | 0.388449  |

H<sub>2</sub>BMe-NHC 5, T2E<sub>c</sub> = -524.384966797 (Hartrees)

M06-2X/def2-TZVP optimized geometry (Å).

0 1

|   |           |           |           |
|---|-----------|-----------|-----------|
| C | -0.609990 | 0.661591  | 0.150340  |
| C | -0.222635 | -0.626630 | -0.255619 |
| C | 1.654376  | 0.999988  | -0.079931 |
| N | 1.143287  | -0.764784 | -0.477484 |
| N | 0.426614  | 1.604673  | 0.004783  |
| C | 1.603153  | -1.720389 | -1.467677 |
| H | 2.627253  | -1.474452 | -1.738943 |
| H | 1.600450  | -2.733440 | -1.052907 |
| H | 0.972326  | -1.695029 | -2.358469 |
| C | 0.132900  | 2.709822  | -0.905970 |
| H | -0.069894 | 2.345022  | -1.918379 |
| H | -0.735947 | 3.256945  | -0.547013 |
| H | 0.981908  | 3.389820  | -0.921708 |
| H | 2.315289  | 1.461598  | -0.812656 |
| B | 2.069559  | -0.283031 | 0.732138  |
| H | 3.199477  | -0.612231 | 0.477247  |
| C | 1.553622  | -0.575330 | 2.215284  |
| H | 1.526801  | -1.649526 | 2.419854  |
| H | 2.243141  | -0.136898 | 2.941091  |
| H | 0.560063  | -0.177796 | 2.436889  |
| C | -1.926986 | 0.940153  | 0.476169  |
| C | -1.186474 | -1.618293 | -0.397041 |
| C | -2.873900 | -0.068091 | 0.369516  |
| C | -2.505741 | -1.333737 | -0.075109 |
| H | -2.209437 | 1.933339  | 0.800454  |
| H | -3.904911 | 0.136203  | 0.625220  |
| H | -3.252632 | -2.112307 | -0.158436 |
| H | -0.900943 | -2.609806 | -0.723805 |

H<sub>2</sub>BMe-NHC 5, CE<sub>c</sub> = -524.412887322 (Hartrees)

M06-2X/def2-TZVP optimized geometry (Å).

0 1

|   |           |           |           |
|---|-----------|-----------|-----------|
| C | -0.752873 | 0.557845  | -0.036958 |
| C | -0.247269 | -0.771821 | -0.140811 |
| C | 1.430705  | 1.462757  | -0.321188 |
| N | 1.052037  | -1.014417 | -0.382533 |
| N | 0.155874  | 1.654668  | -0.211202 |
| C | 1.487223  | -2.382264 | -0.544560 |
| H | 0.912052  | -2.899696 | -1.318336 |
| H | 2.533140  | -2.371635 | -0.845411 |
| H | 1.404460  | -2.958856 | 0.384823  |
| C | -0.407696 | 3.005682  | -0.253640 |
| H | 0.398049  | 3.707412  | -0.442044 |
| H | -1.148941 | 3.070849  | -1.048092 |

|   |           |           |           |
|---|-----------|-----------|-----------|
| H | -0.879017 | 3.238597  | 0.699761  |
| H | 1.999707  | 2.382154  | -0.445419 |
| B | 2.157570  | 0.060697  | -0.239618 |
| H | 2.937726  | 0.002573  | -1.174919 |
| C | 2.963524  | -0.017768 | 1.180621  |
| H | 3.484012  | -0.976415 | 1.260476  |
| H | 3.725645  | 0.760831  | 1.277950  |
| H | 2.295789  | 0.060333  | 2.044898  |
| C | -2.098170 | 0.806626  | 0.193043  |
| C | -1.207919 | -1.801936 | 0.004021  |
| C | -3.006958 | -0.228574 | 0.334002  |
| C | -2.541164 | -1.533195 | 0.233192  |
| H | -2.458943 | 1.821823  | 0.267511  |
| H | -4.049986 | -0.016880 | 0.518517  |
| H | -3.230936 | -2.361136 | 0.341493  |
| H | -0.882406 | -2.829315 | -0.053300 |

H<sub>2</sub>BMe-NHC 5, T3E<sub>c</sub> = -524.405412505 (Hartrees)

M06-2X/def2-TZVP optimized geometry (Å).

0 1

|   |           |           |           |
|---|-----------|-----------|-----------|
| C | 0.831133  | 0.548749  | -0.050326 |
| C | 0.289097  | -0.767807 | 0.001356  |
| C | -1.356116 | 1.497164  | -0.041839 |
| N | -1.065938 | -0.991916 | 0.028594  |
| N | -0.048232 | 1.682635  | -0.047744 |
| C | -1.517314 | -2.358346 | 0.148645  |
| H | -2.603302 | -2.374391 | 0.145235  |
| H | -1.169447 | -2.974285 | -0.687065 |
| H | -1.170099 | -2.827303 | 1.078057  |
| C | 0.525828  | 3.006234  | 0.134852  |
| H | -0.284431 | 3.726453  | 0.202045  |
| H | 1.117232  | 3.042540  | 1.051984  |
| H | 1.164185  | 3.269465  | -0.708640 |
| H | -1.944340 | 2.410485  | -0.030023 |
| B | -2.032292 | 0.149754  | 0.152934  |
| H | -2.028609 | 0.750965  | 1.342588  |
| C | -3.558748 | -0.051634 | -0.271379 |
| H | -3.631498 | -0.466739 | -1.281039 |
| H | -4.100728 | -0.724772 | 0.395152  |
| H | -4.101087 | 0.896532  | -0.266189 |
| C | 1.216444  | -1.818080 | 0.015682  |
| C | 2.197496  | 0.750303  | -0.095004 |
| C | 2.587937  | -1.598113 | -0.030789 |
| C | 3.092488  | -0.317187 | -0.088962 |
| H | 0.857938  | -2.834173 | 0.068795  |
| H | 3.256801  | -2.449233 | -0.015656 |
| H | 4.156548  | -0.131759 | -0.122301 |
| H | 2.592016  | 1.754715  | -0.136990 |

## H<sub>2</sub>BMe-NHC 5, D

E<sub>c</sub> = -524.464192217 (Hartrees)

M06-2X/def2-TZVP optimized geometry (Å).

|     |           |           |           |
|-----|-----------|-----------|-----------|
| 0 1 |           |           |           |
| H   | -2.009169 | 2.270958  | -0.155525 |
| H   | -1.359758 | 1.797324  | 1.401404  |
| C   | -1.362112 | 1.531772  | 0.326527  |
| C   | 0.827413  | 0.565171  | -0.071234 |
| C   | 0.308248  | -0.753961 | -0.030382 |
| N   | -1.091880 | -0.953842 | -0.115645 |
| N   | -0.035046 | 1.638982  | -0.256973 |
| C   | -1.545411 | -2.316098 | -0.342752 |
| H   | -1.031851 | -2.749785 | -1.202842 |
| H   | -1.359348 | -2.954031 | 0.525532  |
| H   | -2.612010 | -2.310924 | -0.544438 |
| C   | 0.522748  | 2.969572  | -0.247491 |
| H   | 0.935401  | 3.248956  | 0.733394  |
| H   | 1.310225  | 3.064603  | -0.995241 |
| H   | -0.268127 | 3.674952  | -0.498420 |
| B   | -1.989537 | 0.101713  | 0.125480  |
| C   | -3.551769 | -0.103137 | 0.202711  |
| H   | -3.964243 | -0.281031 | -0.796098 |
| H   | -3.841926 | -0.957764 | 0.817281  |
| H   | -4.053565 | 0.780420  | 0.599115  |
| C   | 1.183572  | -1.823651 | 0.082450  |
| C   | 2.208051  | 0.733343  | 0.029567  |
| C   | 2.560456  | -1.634910 | 0.163251  |
| C   | 3.068482  | -0.353569 | 0.138150  |
| H   | 0.796302  | -2.831267 | 0.112171  |
| H   | 3.215725  | -2.491077 | 0.248417  |
| H   | 4.134609  | -0.181839 | 0.208385  |
| H   | 2.625835  | 1.728761  | 0.023010  |

## Cartesian coordinates for optimized insertion pathway compounds H<sub>1</sub>BMe<sub>2</sub>-NHC 1

H<sub>1</sub>BMe<sub>2</sub>-NHC 1, A

E<sub>c</sub> = -410.089305023 (Hartrees)

M06-2X/def2-TZVP optimized geometry (Å).

|     |           |           |           |
|-----|-----------|-----------|-----------|
| 0 1 |           |           |           |
| C   | 2.298471  | 0.162630  | 0.023473  |
| C   | 1.744205  | 1.385866  | 0.152195  |
| C   | 0.070061  | -0.087086 | -0.127049 |
| H   | 3.326356  | -0.152202 | 0.037587  |
| H   | 2.191271  | 2.352191  | 0.301665  |
| N   | 0.380413  | 1.211116  | 0.060154  |
| N   | 1.258311  | -0.723855 | -0.143723 |
| C   | -0.595192 | 2.282248  | 0.186148  |
| H   | -0.074440 | 3.182141  | 0.504860  |
| H   | -1.090003 | 2.456837  | -0.766149 |
| H   | -1.341861 | 2.008521  | 0.927661  |
| C   | 1.415142  | -2.160472 | -0.306667 |
| H   | 0.760680  | -2.679732 | 0.388287  |
| H   | 1.150260  | -2.454254 | -1.319925 |
| H   | 2.452782  | -2.414481 | -0.102135 |
| C   | -1.844253 | -1.166153 | 1.299276  |
| H   | -2.791720 | -1.711852 | 1.279904  |
| H   | -1.131025 | -1.789692 | 1.849695  |
| H   | -2.013290 | -0.269984 | 1.909208  |
| B   | -1.383237 | -0.807663 | -0.231944 |
| H   | -1.166899 | -1.829454 | -0.862328 |
| C   | -2.494273 | 0.091545  | -1.017817 |
| H   | -2.911008 | 0.913222  | -0.425721 |
| H   | -2.139748 | 0.516339  | -1.963934 |
| H   | -3.341201 | -0.551590 | -1.271335 |

H<sub>1</sub>BMe<sub>2</sub>-NHC 1, T1

E<sub>c</sub> = -410.038675520 (Hartrees)

M06-2X/def2-TZVP optimized geometry (Å).

|     |           |           |           |
|-----|-----------|-----------|-----------|
| 0 1 |           |           |           |
| C   | -2.151530 | 0.541326  | -0.373621 |
| C   | -2.095946 | -0.765814 | -0.132053 |
| C   | 0.031245  | 0.001893  | -0.052007 |
| H   | -2.999646 | 1.161995  | -0.608415 |
| H   | -2.876390 | -1.507616 | -0.168942 |
| N   | -0.789712 | -1.121221 | 0.252077  |
| N   | -0.858804 | 1.100733  | -0.221841 |
| C   | -0.307533 | -2.453026 | -0.013904 |
| H   | 0.483835  | -2.726028 | 0.679138  |
| H   | -1.127722 | -3.158922 | 0.104313  |
| H   | 0.082956  | -2.533236 | -1.040667 |

|   |           |           |           |
|---|-----------|-----------|-----------|
| C | -0.761324 | 2.201879  | 0.728018  |
| H | 0.249826  | 2.599830  | 0.732424  |
| H | -1.441194 | 2.994673  | 0.415287  |
| H | -1.030772 | 1.890493  | 1.744139  |
| B | 1.549079  | 0.118192  | -0.069185 |
| H | 0.576067  | -0.253122 | -1.172706 |
| C | 2.187033  | 1.489962  | -0.547841 |
| H | 2.544240  | 2.049403  | 0.324200  |
| H | 3.066693  | 1.311879  | -1.170873 |
| H | 1.501366  | 2.137141  | -1.096585 |
| C | 2.510240  | -1.069539 | 0.376715  |
| H | 3.548510  | -0.733436 | 0.371920  |
| H | 2.282620  | -1.419069 | 1.387110  |
| H | 2.460721  | -1.941605 | -0.277925 |

H<sub>1</sub>BMe<sub>2</sub>-NHC 1, B

E<sub>c</sub> = -410.052000695 (Hartrees)

M06-2X/def2-TZVP optimized geometry (Å).

0 1

|   |           |           |           |
|---|-----------|-----------|-----------|
| C | 2.145412  | 0.182594  | -0.347007 |
| C | 1.779611  | -1.080308 | -0.548205 |
| C | -0.015946 | 0.005440  | 0.361257  |
| H | 3.109029  | 0.640393  | -0.504012 |
| H | 2.365245  | -1.906686 | -0.916829 |
| N | 0.382118  | -1.223173 | -0.364389 |
| N | 1.017643  | 0.966430  | -0.042312 |
| C | -0.038754 | -2.461176 | 0.258882  |
| H | -1.117406 | -2.585494 | 0.184521  |
| H | 0.432388  | -3.297114 | -0.257584 |
| H | 0.248003  | -2.495949 | 1.321395  |
| C | 1.187899  | 2.070433  | 0.871659  |
| H | 1.405473  | 1.729703  | 1.896181  |
| H | 2.005716  | 2.705676  | 0.532348  |
| H | 0.278636  | 2.673703  | 0.893433  |
| B | -1.506214 | 0.380226  | -0.058141 |
| H | 0.094939  | -0.191550 | 1.459427  |
| C | -1.771616 | 1.596017  | -1.001851 |
| H | -2.672123 | 1.486738  | -1.608473 |
| H | -1.953832 | 2.461523  | -0.347960 |
| H | -0.916612 | 1.850992  | -1.627224 |
| C | -2.702260 | -0.484559 | 0.474918  |
| H | -2.948461 | -1.215369 | -0.306761 |
| H | -2.497648 | -1.043644 | 1.389008  |
| H | -3.606682 | 0.112509  | 0.612224  |

H<sub>1</sub>BMe<sub>2</sub>-NHC 1, T2

E<sub>c</sub> = -410.052411788 (Hartrees)

M06-2X/def2-TZVP optimized geometry (Å).

0 1

|   |           |           |           |
|---|-----------|-----------|-----------|
| C | -1.522513 | -0.245035 | 1.030897  |
| C | -0.458392 | -1.053734 | 1.100592  |
| C | -0.319294 | 0.540093  | -0.754244 |
| H | -2.355336 | -0.217951 | 1.716052  |
| H | -0.317184 | -1.833347 | 1.836021  |
| N | 0.517655  | -0.845413 | 0.124376  |
| N | -1.548895 | 0.544312  | -0.124349 |
| C | 1.182339  | -2.035439 | -0.391455 |
| H | 1.808845  | -2.474589 | 0.390535  |
| H | 0.456275  | -2.778357 | -0.725380 |
| H | 1.823332  | -1.759151 | -1.223476 |
| C | -2.749980 | 0.398200  | -0.938954 |
| H | -2.735993 | 1.135078  | -1.739774 |
| H | -2.825377 | -0.607937 | -1.366082 |
| H | -3.624988 | 0.584229  | -0.317158 |
| H | -0.382201 | 0.419266  | -1.837080 |
| C | 1.238582  | 1.476066  | 1.344577  |
| H | 2.051368  | 1.065554  | 1.952608  |
| H | 1.510451  | 2.511067  | 1.119487  |
| H | 0.346364  | 1.511422  | 1.972312  |
| C | 2.321868  | 0.739108  | -1.030523 |
| H | 3.222515  | 0.282066  | -0.608063 |
| H | 2.150804  | 0.279282  | -2.009367 |
| H | 2.565906  | 1.788002  | -1.217884 |
| B | 1.073647  | 0.657504  | -0.021656 |

H<sub>1</sub>BMe<sub>2</sub>-NHC 1, C

E<sub>c</sub> = -410.088612746 (Hartrees)

M06-2X/def2-TZVP optimized geometry (Å).

0 1

|   |           |           |           |
|---|-----------|-----------|-----------|
| C | 1.389391  | 1.243454  | 0.228475  |
| C | 0.089298  | 1.652792  | 0.126450  |
| C | 0.785332  | -0.993825 | -0.233725 |
| H | 2.214709  | 1.911613  | 0.392931  |
| H | -0.110739 | 2.717365  | 0.215457  |
| N | -0.931428 | 0.845352  | -0.100374 |
| N | 1.701742  | -0.092923 | -0.073909 |
| C | -2.254039 | 1.393981  | -0.300464 |
| H | -2.240303 | 2.480958  | -0.208522 |
| H | -2.631863 | 1.131788  | -1.291159 |
| H | -2.949627 | 0.987010  | 0.438070  |
| C | 3.125614  | -0.375795 | -0.249163 |
| H | 3.261436  | -1.433360 | -0.453560 |
| H | 3.511050  | 0.220947  | -1.074755 |
| H | 3.652914  | -0.104685 | 0.664673  |

|   |           |           |           |
|---|-----------|-----------|-----------|
| H | 1.171121  | -1.965430 | -0.537121 |
| B | -0.781280 | -0.723499 | 0.051046  |
| C | -1.101171 | -1.170695 | 1.587752  |
| H | -2.146957 | -0.973972 | 1.847118  |
| H | -0.941018 | -2.243346 | 1.738485  |
| H | -0.480447 | -0.641493 | 2.318449  |
| C | -1.699980 | -1.511513 | -1.028266 |
| H | -1.494300 | -2.586230 | -0.999685 |
| H | -2.767194 | -1.400903 | -0.811761 |
| H | -1.541243 | -1.180165 | -2.060214 |

H<sub>1</sub>BMe<sub>2</sub>-NHC 1, T3

E<sub>c</sub> = -410.062469107 (Hartrees)

M06-2X/def2-TZVP optimized geometry (Å).

|     |           |           |           |
|-----|-----------|-----------|-----------|
| 0 1 |           |           |           |
| C   | 1.205988  | -1.397775 | -0.136776 |
| C   | -0.094625 | -1.698804 | -0.033013 |
| C   | 0.718505  | 0.896424  | -0.442879 |
| H   | 1.973755  | -2.153563 | -0.096610 |
| H   | -0.368678 | -2.736843 | 0.121041  |
| N   | -1.126185 | -0.797808 | -0.166249 |
| N   | 1.652553  | -0.068181 | -0.379913 |
| C   | -2.438261 | -1.222141 | 0.268666  |
| H   | -2.619771 | -2.257886 | -0.027617 |
| H   | -2.574029 | -1.156976 | 1.357172  |
| H   | -3.199777 | -0.601546 | -0.202556 |
| C   | 3.017760  | 0.232830  | 0.002011  |
| H   | 3.276152  | 1.233419  | -0.339975 |
| H   | 3.148458  | 0.180037  | 1.088813  |
| H   | 3.695842  | -0.483351 | -0.462948 |
| H   | 1.110790  | 1.892227  | -0.623651 |
| B   | -0.764072 | 0.652067  | -0.261839 |
| C   | -1.868149 | 1.690814  | -0.741697 |
| H   | -2.700077 | 1.772265  | -0.036518 |
| H   | -1.457487 | 2.694518  | -0.870400 |
| H   | -2.290539 | 1.382717  | -1.702366 |
| C   | -0.115962 | 1.306831  | 1.374447  |
| H   | -0.038268 | 2.388296  | 1.447622  |
| H   | -1.061384 | 0.986368  | 1.820768  |
| H   | 0.689264  | 0.812820  | 1.914995  |

H<sub>1</sub>BMe<sub>2</sub>-NHC 1, D

E<sub>c</sub> = -410.119259984 (Hartrees)

M06-2X/def2-TZVP optimized geometry (Å).

|     |           |           |           |
|-----|-----------|-----------|-----------|
| 0 1 |           |           |           |
| H   | 1.016163  | 1.626634  | -0.935003 |
| C   | 0.721262  | 0.899161  | -0.170226 |
| C   | 0.901715  | -1.507516 | 0.048278  |
| C   | -0.401900 | -1.658320 | 0.296599  |
| H   | 1.584141  | -2.331526 | 0.209237  |
| H   | -0.804307 | -2.591444 | 0.661493  |
| N   | -1.319903 | -0.611549 | 0.049678  |
| N   | 1.443874  | -0.341349 | -0.459365 |
| C   | -2.716218 | -1.002940 | 0.097368  |
| H   | -2.922920 | -1.780382 | -0.642537 |
| H   | -2.973035 | -1.395653 | 1.085038  |
| H   | -3.352045 | -0.146983 | -0.112520 |
| C   | 2.886198  | -0.253369 | -0.499125 |
| H   | 3.341220  | -0.131599 | 0.492543  |
| H   | 3.297753  | -1.154053 | -0.955766 |
| H   | 3.175274  | 0.600864  | -1.113219 |
| B   | -0.855438 | 0.677997  | -0.244753 |
| C   | -1.826174 | 1.887736  | -0.547088 |
| H   | -2.358234 | 1.737248  | -1.491526 |
| H   | -2.591242 | 2.012368  | 0.223444  |
| H   | -1.286910 | 2.832516  | -0.629480 |
| C   | 1.072697  | 1.485416  | 1.209991  |
| H   | 2.122289  | 1.777169  | 1.281016  |
| H   | 0.469363  | 2.373274  | 1.411497  |
| H   | 0.866410  | 0.750863  | 1.992575  |

**Cartesian coordinates for optimized insertion pathway compounds H<sub>1</sub>BMe<sub>2</sub>-NHC 2**

H<sub>1</sub>BMe<sub>2</sub>-NHC 2, A

E<sub>c</sub> = -411.283039641 (Hartrees)

M06-2X/def2-TZVP optimized geometry (Å).

0 1

|   |           |           |           |
|---|-----------|-----------|-----------|
| C | 2.333656  | 0.108215  | 0.074589  |
| C | 1.674944  | 1.482345  | -0.001682 |
| C | 0.026227  | -0.159458 | -0.068085 |
| H | 2.754372  | -0.096290 | 1.064694  |
| H | 1.990432  | 2.156600  | 0.794397  |
| N | 0.263585  | 1.141145  | 0.131703  |
| N | 1.204836  | -0.783503 | -0.174962 |
| C | -0.726182 | 2.191816  | 0.170447  |
| H | -0.370940 | 2.979832  | 0.835721  |
| H | -0.898440 | 2.614935  | -0.822859 |
| H | -1.658895 | 1.795644  | 0.554468  |
| C | 1.442583  | -2.207673 | -0.180571 |
| H | 0.510061  | -2.724107 | -0.377070 |
| H | 2.171921  | -2.451943 | -0.955156 |
| H | 1.840883  | -2.528421 | 0.786696  |
| C | -2.070042 | -0.878145 | 1.363937  |
| H | -3.044409 | -1.373870 | 1.339870  |
| H | -1.451450 | -1.433541 | 2.076342  |
| H | -2.237094 | 0.113965  | 1.798802  |
| B | -1.448131 | -0.855038 | -0.149780 |
| H | -1.262506 | -1.994623 | -0.528151 |
| C | -2.405624 | -0.102834 | -1.242692 |
| H | -2.862473 | 0.831376  | -0.902710 |
| H | -1.904497 | 0.112581  | -2.193030 |
| H | -3.236374 | -0.771953 | -1.482297 |
| H | 1.851523  | 1.973827  | -0.963944 |
| H | 3.116213  | -0.037921 | -0.669706 |

H<sub>1</sub>BMe<sub>2</sub>-NHC 2, T1

E<sub>c</sub> = -411.257384399 (Hartrees)

M06-2X/def2-TZVP optimized geometry (Å).

0 1

|   |           |           |           |
|---|-----------|-----------|-----------|
| C | -2.194196 | 0.596386  | -0.207230 |
| C | -1.997389 | -0.894916 | -0.399173 |
| C | 0.057004  | 0.007200  | 0.017231  |
| H | -2.695845 | 0.789374  | 0.749075  |
| H | -2.800247 | -1.499510 | 0.021105  |
| N | -0.743299 | -1.114813 | 0.312717  |
| N | -0.820684 | 1.098763  | -0.166905 |
| C | -0.190428 | -2.436039 | 0.134510  |
| H | 0.611910  | -2.618354 | 0.842760  |

|   |           |           |           |
|---|-----------|-----------|-----------|
| H | -0.977388 | -3.170053 | 0.305150  |
| H | 0.200360  | -2.572512 | -0.886745 |
| C | -0.653665 | 2.238419  | 0.717693  |
| H | -0.921978 | 1.987261  | 1.753202  |
| H | 0.371188  | 2.594980  | 0.697670  |
| H | -1.304399 | 3.046779  | 0.381271  |
| B | 1.573198  | 0.115323  | -0.103576 |
| H | 0.660987  | -0.260083 | -1.141218 |
| C | 2.201464  | 1.496360  | -0.590110 |
| H | 2.592839  | 2.056878  | 0.266207  |
| H | 3.058389  | 1.307580  | -1.241494 |
| H | 1.508429  | 2.146685  | -1.125126 |
| C | 2.586398  | -1.043584 | 0.329296  |
| H | 3.612211  | -0.683201 | 0.232953  |
| H | 2.447426  | -1.339473 | 1.372313  |
| H | 2.517687  | -1.952056 | -0.270385 |
| H | -1.882517 | -1.144252 | -1.466728 |
| H | -2.772296 | 1.062736  | -1.006114 |

H<sub>1</sub>BMe<sub>2</sub>-NHC 2, B

E<sub>c</sub> = -411.278972460 (Hartrees)

M06-2X/def2-TZVP optimized geometry (Å).

0 1

|   |           |           |           |
|---|-----------|-----------|-----------|
| C | -1.837424 | 0.647257  | -0.592986 |
| C | -0.520945 | 1.128962  | -1.182678 |
| C | -0.147744 | -0.311338 | 0.686914  |
| H | -2.605484 | 0.466732  | -1.346488 |
| H | -0.265949 | 0.574210  | -2.082952 |
| N | 0.452645  | 0.810519  | -0.112345 |
| N | -1.428898 | -0.588997 | 0.051170  |
| C | 0.908597  | 1.981451  | 0.629428  |
| H | 1.505935  | 1.665937  | 1.479054  |
| H | 1.525187  | 2.604287  | -0.019472 |
| H | 0.053183  | 2.561706  | 0.988095  |
| C | -2.403979 | -1.142527 | 0.959653  |
| H | -2.645015 | -0.453289 | 1.787446  |
| H | -3.324123 | -1.369072 | 0.420203  |
| H | -2.021964 | -2.070273 | 1.385713  |
| B | 1.229057  | -0.656342 | -0.025914 |
| H | -0.230639 | -0.036636 | 1.744912  |
| C | 1.223614  | -1.481914 | -1.388317 |
| H | 1.870583  | -1.027169 | -2.145731 |
| H | 1.626099  | -2.481473 | -1.203273 |
| H | 0.230005  | -1.615795 | -1.819595 |
| C | 2.587449  | -0.616406 | 0.816734  |
| H | 3.374534  | -0.053106 | 0.305153  |
| H | 2.496008  | -0.213013 | 1.828375  |
| H | 2.964025  | -1.636804 | 0.925231  |
| H | -2.225185 | 1.385172  | 0.133407  |
| H | -0.496119 | 2.196737  | -1.394769 |

H<sub>1</sub>BMe<sub>2</sub>-NHC 2, T2E<sub>c</sub> = -411.266941312 (Hartrees)

M06-2X/def2-TZVP optimized geometry (Å).

0 1

|   |           |           |           |
|---|-----------|-----------|-----------|
| C | 1.445560  | -0.033612 | -1.136865 |
| C | 0.454297  | -1.224066 | -0.961033 |
| C | 0.394738  | 0.882535  | 0.703030  |
| H | 2.422674  | -0.373953 | -1.474291 |
| H | 0.994691  | -2.122432 | -0.637220 |
| N | -0.548706 | -0.885403 | 0.003209  |
| N | 1.562845  | 0.622235  | 0.153546  |
| C | -1.276546 | -1.998409 | 0.558043  |
| H | -0.591968 | -2.781924 | 0.902812  |
| H | -1.873047 | -1.667466 | 1.405854  |
| H | -1.961571 | -2.455036 | -0.170946 |
| C | 2.734098  | 0.292612  | 0.952915  |
| H | 2.673895  | 0.808905  | 1.907904  |
| H | 2.779150  | -0.786176 | 1.130873  |
| H | 3.638201  | 0.606668  | 0.432587  |
| H | 0.453389  | 1.061994  | 1.778763  |
| C | -1.432953 | 1.249880  | -1.435237 |
| H | -2.511771 | 1.165891  | -1.597551 |
| H | -1.199925 | 2.319083  | -1.470389 |
| H | -0.961985 | 0.792681  | -2.310234 |
| C | -2.202937 | 0.864206  | 1.101714  |
| H | -3.140329 | 0.372369  | 0.824348  |
| H | -1.949657 | 0.531253  | 2.114536  |
| H | -2.420631 | 1.934823  | 1.161991  |
| B | -1.047807 | 0.598424  | 0.004181  |
| H | 0.040516  | -1.433417 | -1.957855 |
| H | 1.050881  | 0.677923  | -1.854775 |

H<sub>1</sub>BMe<sub>2</sub>-NHC 2, CE<sub>c</sub> = -411.283861488 (Hartrees)

M06-2X/def2-TZVP optimized geometry (Å).

0 1

|   |           |           |           |
|---|-----------|-----------|-----------|
| C | 1.411796  | 1.294800  | -0.190055 |
| C | 0.009982  | 1.633350  | 0.278173  |
| C | 0.758337  | -1.001133 | 0.096503  |
| H | 1.528244  | 1.524840  | -1.251504 |
| H | -0.164401 | 2.688103  | 0.036810  |
| N | -0.952943 | 0.795731  | -0.378898 |
| N | 1.710030  | -0.137912 | -0.012476 |
| C | -2.290334 | 1.325152  | -0.234555 |
| H | -2.368080 | 2.317412  | -0.691865 |
| H | -3.002716 | 0.669514  | -0.736685 |
| H | -2.609270 | 1.416972  | 0.817596  |
| C | 3.127572  | -0.475811 | -0.005468 |
| H | 3.245706  | -1.553816 | 0.062542  |

|   |           |           |           |
|---|-----------|-----------|-----------|
| H | 3.587390  | -0.113103 | -0.925608 |
| H | 3.615097  | 0.005289  | 0.842832  |
| H | 1.111641  | -2.024351 | 0.237123  |
| B | -0.805526 | -0.694816 | 0.001606  |
| C | -1.447530 | -1.098187 | 1.463889  |
| H | -2.538755 | -1.045497 | 1.401288  |
| H | -1.202494 | -2.121361 | 1.765133  |
| H | -1.139099 | -0.438741 | 2.282023  |
| C | -1.378925 | -1.690125 | -1.163669 |
| H | -1.231502 | -2.747744 | -0.923464 |
| H | -2.458098 | -1.543656 | -1.267345 |
| H | -0.933942 | -1.499341 | -2.144253 |
| H | -0.021158 | 1.556280  | 1.383506  |
| H | 2.164080  | 1.850271  | 0.374551  |

H<sub>1</sub>BMe<sub>2</sub>-NHC 2, T3E<sub>c</sub> = -411.274447893 (Hartrees)

M06-2X/def2-TZVP optimized geometry (Å).

0 1

|   |           |           |           |
|---|-----------|-----------|-----------|
| C | -1.289638 | -1.343781 | -0.423146 |
| C | 0.031303  | -1.638094 | 0.275595  |
| C | -0.682145 | 0.981610  | -0.378023 |
| H | -2.086924 | -1.930934 | 0.035478  |
| H | 0.267578  | -2.696349 | 0.118007  |
| N | 1.091894  | -0.813473 | -0.248550 |
| N | -1.654669 | 0.070288  | -0.330405 |
| C | 2.392491  | -1.237712 | 0.213386  |
| H | 2.560252  | -2.292105 | -0.026991 |
| H | 3.171762  | -0.653509 | -0.274847 |
| H | 2.521621  | -1.128358 | 1.304657  |
| C | -3.010865 | 0.386363  | 0.061373  |
| H | -3.206434 | 0.085866  | 1.096745  |
| H | -3.171247 | 1.459647  | -0.026042 |
| H | -3.722463 | -0.128852 | -0.586392 |
| H | -1.024657 | 2.010316  | -0.443584 |
| B | 0.801621  | 0.643133  | -0.283123 |
| C | 0.334646  | 1.298152  | 1.400530  |
| H | 0.486657  | 2.373410  | 1.455287  |
| H | -0.556498 | 1.019380  | 1.960160  |
| H | 1.188545  | 0.787916  | 1.855244  |
| C | 1.923498  | 1.643021  | -0.818830 |
| H | 1.541869  | 2.658918  | -0.943645 |
| H | 2.780001  | 1.704184  | -0.141238 |
| H | 2.303713  | 1.313447  | -1.789368 |
| H | -1.216211 | -1.629279 | -1.475647 |
| H | -0.101988 | -1.504417 | 1.365166  |

### H<sub>1</sub>BMe<sub>2</sub>-NHC 2, D

E<sub>c</sub> = -411.332162987 (Hartrees)

M06-2X/def2-TZVP optimized geometry (Å).

|     |           |           |           |
|-----|-----------|-----------|-----------|
| 0 1 |           |           |           |
| H   | 0.946020  | 1.448809  | -1.214436 |
| C   | 0.744208  | 0.866292  | -0.305643 |
| C   | 0.881737  | -1.430424 | 0.424566  |
| C   | -0.561704 | -1.750293 | 0.092700  |
| H   | 1.472590  | -2.343679 | 0.322848  |
| H   | -0.970080 | -2.411007 | 0.865214  |
| N   | -1.382363 | -0.550282 | 0.015952  |
| N   | 1.406837  | -0.430904 | -0.479912 |
| C   | -2.801320 | -0.837699 | 0.061803  |
| H   | -3.089562 | -1.499210 | -0.762040 |
| H   | -3.063419 | -1.339251 | 0.998303  |
| H   | -3.380527 | 0.078861  | -0.012376 |
| C   | 2.852309  | -0.368116 | -0.449597 |
| H   | 3.263800  | -0.168294 | 0.552145  |
| H   | 3.266928  | -1.314870 | -0.800887 |
| H   | 3.195153  | 0.422985  | -1.119108 |
| B   | -0.835015 | 0.717690  | -0.201605 |
| C   | -1.749621 | 2.005714  | -0.326568 |
| H   | -2.495373 | 1.896180  | -1.118577 |
| H   | -2.303909 | 2.200176  | 0.596461  |
| H   | -1.169271 | 2.901656  | -0.551210 |
| C   | 1.267966  | 1.694586  | 0.886306  |
| H   | 2.314804  | 1.975314  | 0.760739  |
| H   | 0.692174  | 2.615417  | 0.990883  |
| H   | 1.177607  | 1.144031  | 1.825575  |
| H   | 0.954988  | -1.117128 | 1.480871  |
| H   | -0.609605 | -2.290504 | -0.860074 |

### Cartesian coordinates for optimized insertion pathway compounds H<sub>1</sub>BMe<sub>2</sub>-NHC 3

#### H<sub>1</sub>BMe<sub>2</sub>-NHC 3, A

E<sub>c</sub> = -488.715678933 (Hartrees)

M06-2X/def2-TZVP optimized geometry (Å).

|     |           |           |           |
|-----|-----------|-----------|-----------|
| 0 1 |           |           |           |
| C   | 1.700192  | -0.468579 | -0.038234 |
| C   | 1.438042  | 0.857845  | 0.043014  |
| C   | -0.543547 | -0.217398 | -0.092947 |
| N   | 0.055862  | 0.982621  | 0.017475  |
| N   | 0.468792  | -1.104716 | -0.110621 |
| C   | -0.662137 | 2.241234  | 0.118442  |
| H   | -0.034273 | 2.968454  | 0.627887  |
| H   | -0.929421 | 2.614276  | -0.869579 |
| H   | -1.569458 | 2.081241  | 0.692614  |
| C   | 0.287040  | -2.544475 | -0.194217 |
| H   | -0.580764 | -2.827483 | 0.392495  |
| H   | 0.125006  | -2.850875 | -1.227120 |
| H   | 1.174347  | -3.034361 | 0.199526  |
| C   | -2.716281 | -0.623140 | 1.352210  |
| H   | -3.776204 | -0.892444 | 1.334332  |
| H   | -2.213046 | -1.357609 | 1.990621  |
| H   | -2.649534 | 0.340550  | 1.872743  |
| B   | -2.132746 | -0.566087 | -0.176304 |
| H   | -2.173924 | -1.671043 | -0.690107 |
| C   | -2.950156 | 0.485398  | -1.124547 |
| H   | -3.198003 | 1.437426  | -0.643583 |
| H   | -2.442606 | 0.721575  | -2.066905 |
| H   | -3.906821 | 0.032541  | -1.398473 |
| C   | 2.991675  | -1.205227 | -0.053405 |
| H   | 3.109791  | -1.831508 | 0.833476  |
| H   | 3.072872  | -1.848348 | -0.931573 |
| H   | 3.820822  | -0.501389 | -0.075634 |
| C   | 2.350831  | 2.026556  | 0.149750  |
| H   | 2.163579  | 2.753782  | -0.642369 |
| H   | 2.240032  | 2.538305  | 1.108160  |
| H   | 3.384796  | 1.698732  | 0.066623  |

#### H<sub>1</sub>BMe<sub>2</sub>-NHC 3, T1

E<sub>c</sub> = -488.663383591 (Hartrees)

M06-2X/def2-TZVP optimized geometry (Å).

|     |           |           |          |
|-----|-----------|-----------|----------|
| 0 1 |           |           |          |
| C   | -1.588412 | 0.656776  | 0.031106 |
| C   | -1.577259 | -0.680467 | 0.029291 |
| C   | 0.602632  | 0.012335  | 0.083690 |
| N   | -0.248583 | -1.126557 | 0.258988 |
| N   | -0.274255 | 1.111358  | 0.267305 |



|   |           |           |           |
|---|-----------|-----------|-----------|
| C | 0.149971  | -2.375429 | -0.350419 |
| H | 0.964031  | -2.842749 | 0.192705  |
| H | -0.692415 | -3.062426 | -0.342136 |
| H | 0.467226  | -2.217436 | -1.394111 |
| C | 0.115841  | 2.453156  | -0.074006 |
| H | 0.974704  | 2.757052  | 0.518762  |
| H | 0.367339  | 2.552974  | -1.140455 |
| H | -0.705509 | 3.129574  | 0.152175  |
| B | 2.135327  | 0.008473  | 0.053627  |
| H | 1.008093  | -0.037972 | -1.125585 |
| C | 3.014710  | 1.306980  | -0.207578 |
| H | 3.309384  | 1.730700  | 0.760044  |
| H | 3.944326  | 1.023975  | -0.706274 |
| H | 2.561895  | 2.105053  | -0.788803 |
| C | 2.957297  | -1.332833 | 0.295151  |
| H | 4.004309  | -1.085200 | 0.479914  |
| H | 2.593001  | -1.899509 | 1.154389  |
| H | 2.947487  | -2.006021 | -0.565111 |
| C | -2.711680 | -1.640853 | -0.000565 |
| H | -2.712239 | -2.258351 | -0.901503 |
| H | -2.668929 | -2.311711 | 0.861763  |
| H | -3.659226 | -1.107561 | 0.033865  |
| C | -2.732173 | 1.605497  | 0.003514  |
| H | -2.759530 | 2.210936  | 0.913785  |
| H | -2.674407 | 2.288756  | -0.846700 |
| H | -3.671868 | 1.062975  | -0.070020 |

H<sub>1</sub>BMe<sub>2</sub>-NHC 3, B

E<sub>e</sub> = -488.679814452 (Hartrees)

M06-2X/def2-TZVP optimized geometry (Å).

|     |           |           |           |
|-----|-----------|-----------|-----------|
| 0 1 |           |           |           |
| C   | 1.559821  | -0.499180 | 0.035136  |
| C   | 1.360183  | 0.814499  | 0.176739  |
| C   | -0.643099 | -0.113298 | -0.468888 |
| N   | -0.035857 | 1.103767  | 0.109438  |
| N   | 0.314133  | -1.159998 | -0.105914 |
| C   | -0.396024 | 2.323750  | -0.584668 |
| H   | -1.469669 | 2.489706  | -0.517280 |
| H   | 0.100451  | 3.173424  | -0.118220 |
| H   | -0.114405 | 2.284772  | -1.649201 |
| C   | 0.252535  | -2.313306 | -0.973443 |
| H   | 0.463772  | -2.056784 | -2.024380 |
| H   | 0.962088  | -3.071735 | -0.644983 |
| H   | -0.747572 | -2.748442 | -0.923247 |
| B   | -2.084462 | -0.247575 | 0.193690  |
| H   | -0.651694 | -0.004660 | -1.581945 |
| C   | -2.231633 | -1.156249 | 1.456014  |
| H   | -3.213262 | -1.127181 | 1.928602  |
| H   | -1.995558 | -2.193828 | 1.194168  |
| H   | -1.465557 | -0.878708 | 2.186207  |
| C   | -3.294503 | 0.580211  | -0.365274 |

|   |           |           |           |
|---|-----------|-----------|-----------|
| H | -3.507426 | 1.394198  | 0.339232  |
| H | -3.147278 | 1.019972  | -1.352451 |
| H | -4.203043 | -0.028563 | -0.378800 |
| C | 2.805583  | -1.297991 | 0.176152  |
| H | 3.051055  | -1.827295 | -0.747548 |
| H | 3.650092  | -0.661116 | 0.430348  |
| H | 2.688417  | -2.048042 | 0.963470  |
| C | 2.316467  | 1.892531  | 0.543001  |
| H | 2.411320  | 2.643471  | -0.244813 |
| H | 1.980507  | 2.405728  | 1.448707  |
| H | 3.306165  | 1.480764  | 0.730402  |

H<sub>1</sub>BMe<sub>2</sub>-NHC 3, T2

E<sub>e</sub> = -488.677257265 (Hartrees)

M06-2X/def2-TZVP optimized geometry (Å).

|     |           |           |           |
|-----|-----------|-----------|-----------|
| 0 1 |           |           |           |
| C   | 1.404350  | 0.116874  | 0.234036  |
| C   | 0.471882  | 1.027389  | -0.109660 |
| C   | -0.325710 | -1.316211 | -0.279228 |
| N   | -0.765951 | 0.498654  | -0.507802 |
| N   | 1.022318  | -1.206328 | -0.082641 |
| C   | -1.496862 | 1.193517  | -1.556821 |
| H   | -0.852403 | 1.417044  | -2.409515 |
| H   | -2.318183 | 0.565561  | -1.890199 |
| H   | -1.921808 | 2.128388  | -1.177995 |
| C   | 1.920416  | -1.908349 | -0.994247 |
| H   | 1.534273  | -2.910108 | -1.170302 |
| H   | 2.016027  | -1.378231 | -1.948761 |
| H   | 2.905062  | -2.002060 | -0.539167 |
| H   | -0.596769 | -1.963085 | -1.115379 |
| C   | -1.256572 | -0.168474 | 2.079442  |
| H   | -1.606744 | -1.002007 | 2.694756  |
| H   | -0.231292 | 0.045601  | 2.389288  |
| H   | -1.869744 | 0.696781  | 2.353252  |
| C   | -2.928985 | -0.938129 | 0.094554  |
| H   | -3.631227 | -0.105148 | 0.202877  |
| H   | -3.023309 | -1.311852 | -0.930462 |
| H   | -3.290365 | -1.734189 | 0.750965  |
| B   | -1.433863 | -0.528637 | 0.525177  |
| C   | 0.614799  | 2.513815  | -0.042008 |
| H   | 0.475698  | 2.965231  | -1.026191 |
| H   | -0.137912 | 2.941605  | 0.625368  |
| H   | 1.599989  | 2.802049  | 0.314334  |
| C   | 2.760002  | 0.350135  | 0.816368  |
| H   | 3.555914  | 0.202394  | 0.082212  |
| H   | 2.853236  | 1.360044  | 1.207455  |
| H   | 2.934379  | -0.344522 | 1.640064  |

H<sub>1</sub>BMe<sub>2</sub>-NHC 3, CE<sub>c</sub> = -488.700876977 (Hartrees)

M06-2X/def2-TZVP optimized geometry (Å).

0 1

|   |           |           |           |
|---|-----------|-----------|-----------|
| C | 1.358723  | 0.299650  | 0.099345  |
| C | 0.290607  | 1.154807  | -0.074138 |
| C | -0.034246 | -1.587977 | -0.282684 |
| N | -0.945520 | 0.686959  | -0.309028 |
| N | 1.151373  | -1.061065 | -0.242040 |
| C | -2.014497 | 1.595742  | -0.671546 |
| H | -1.682486 | 2.381616  | -1.349414 |
| H | -2.796843 | 1.031527  | -1.172809 |
| H | -2.461702 | 2.068955  | 0.211266  |
| C | 2.329932  | -1.817380 | -0.676270 |
| H | 2.010927  | -2.804125 | -0.996465 |
| H | 2.815410  | -1.297122 | -1.500441 |
| H | 3.035779  | -1.914593 | 0.145585  |
| H | -0.058587 | -2.594163 | -0.698384 |
| B | -1.318611 | -0.758148 | 0.211132  |
| C | -1.400768 | -0.775358 | 1.840276  |
| H | -2.208926 | -0.122746 | 2.188741  |
| H | -1.616157 | -1.776587 | 2.226531  |
| H | -0.478088 | -0.431793 | 2.320594  |
| C | -2.658902 | -1.349992 | -0.479878 |
| H | -2.765291 | -2.409826 | -0.226860 |
| H | -3.568695 | -0.860496 | -0.119960 |
| H | -2.659735 | -1.282255 | -1.573783 |
| C | 0.495083  | 2.646277  | -0.058668 |
| H | 0.345642  | 3.052707  | -1.060367 |
| H | -0.229896 | 3.126638  | 0.600014  |
| H | 1.492987  | 2.926354  | 0.256767  |
| C | 2.741358  | 0.668422  | 0.549774  |
| H | 3.092724  | -0.008467 | 1.333122  |
| H | 3.490160  | 0.658618  | -0.249403 |
| H | 2.751119  | 1.660092  | 0.989819  |

H<sub>1</sub>BMe<sub>2</sub>-NHC 3, T3E<sub>c</sub> = -488.676620607 (Hartrees)

M06-2X/def2-TZVP optimized geometry (Å).

|   |           |           |           |
|---|-----------|-----------|-----------|
| C | 1.386648  | 0.332435  | 0.130947  |
| C | 0.373492  | 1.220732  | 0.031585  |
| C | -0.147049 | -1.484067 | 0.447095  |
| N | -0.972874 | 0.859561  | 0.114188  |
| N | 1.117770  | -1.078294 | 0.277807  |
| C | -1.970654 | 1.759694  | -0.430778 |
| H | -1.883609 | 1.888170  | -1.518888 |
| H | -2.956582 | 1.347510  | -0.225678 |
| H | -1.934399 | 2.750656  | 0.024786  |
| C | 2.096336  | -2.013329 | -0.255327 |

|   |           |           |           |
|---|-----------|-----------|-----------|
| H | 1.747955  | -3.026225 | -0.063495 |
| H | 2.214964  | -1.882586 | -1.336919 |
| H | 3.068344  | -1.885206 | 0.216749  |
| H | -0.261115 | -2.544448 | 0.650201  |
| B | -1.341830 | -0.573191 | 0.319058  |
| C | -2.755907 | -0.950132 | 0.954069  |
| H | -3.598648 | -0.725153 | 0.294933  |
| H | -2.819333 | -2.014495 | 1.192442  |
| H | -2.917694 | -0.397120 | 1.883368  |
| C | -1.235807 | -1.524277 | -1.277825 |
| H | -1.696660 | -2.508843 | -1.258198 |
| H | -1.938287 | -0.811175 | -1.717566 |
| H | -0.337340 | -1.523592 | -1.892834 |
| C | 2.842423  | 0.664829  | 0.282617  |
| H | 3.240129  | 0.199291  | 1.189736  |
| H | 3.445465  | 0.305600  | -0.555828 |
| H | 3.014335  | 1.730598  | 0.372657  |
| C | 0.625387  | 2.698912  | -0.087440 |
| H | 1.677794  | 2.945970  | -0.145980 |
| H | 0.148681  | 3.094770  | -0.985359 |
| H | 0.191674  | 3.224579  | 0.766955  |

H<sub>1</sub>BMe<sub>2</sub>-NHC 3, DE<sub>c</sub> = -488.733063119 (Hartrees)

M06-2X/def2-TZVP optimized geometry (Å).

0 1

|   |           |           |           |
|---|-----------|-----------|-----------|
| H | -0.296217 | -2.465010 | -0.495663 |
| C | -0.226457 | -1.525437 | 0.062332  |
| C | -1.074691 | 0.740467  | -0.163090 |
| C | 0.141172  | 1.273638  | 0.073303  |
| N | 1.308582  | 0.467110  | -0.118941 |
| N | -1.192076 | -0.605623 | -0.544954 |
| C | 2.546051  | 1.179183  | -0.404259 |
| H | 2.424262  | 1.833226  | -1.271107 |
| H | 2.873500  | 1.789922  | 0.438903  |
| H | 3.329488  | 0.461544  | -0.629242 |
| C | -2.507514 | -1.174262 | -0.751511 |
| H | -3.082060 | -1.312599 | 0.174622  |
| H | -3.100218 | -0.562762 | -1.428941 |
| H | -2.383844 | -2.153833 | -1.214548 |
| B | 1.227171  | -0.932061 | -0.138710 |
| C | 2.479585  | -1.877416 | -0.334206 |
| H | 2.808828  | -1.872730 | -1.378772 |
| H | 3.342483  | -1.582872 | 0.266754  |
| H | 2.240104  | -2.912613 | -0.084659 |
| C | -0.516578 | -1.820618 | 1.543156  |
| H | -1.491565 | -2.290613 | 1.688020  |
| H | 0.240191  | -2.494849 | 1.950327  |
| H | -0.491772 | -0.894848 | 2.122887  |
| C | -2.355323 | 1.521102  | -0.085376 |
| H | -2.823556 | 1.585896  | -1.070018 |

|   |           |          |           |
|---|-----------|----------|-----------|
| H | -3.073619 | 1.042540 | 0.583634  |
| H | -2.197918 | 2.535869 | 0.259712  |
| C | 0.397955  | 2.658274 | 0.593368  |
| H | 1.009157  | 2.615605 | 1.499263  |
| H | 0.934801  | 3.282853 | -0.125083 |
| H | -0.518646 | 3.175590 | 0.852439  |

**Cartesian coordinates for optimized insertion pathway compounds H<sub>1</sub>BMe<sub>2</sub>-NHC 4**

H<sub>1</sub>BMe<sub>2</sub>-NHC 4, A

E<sub>c</sub> = -1329.28212732 (Hartrees)

M06-2X/def2-TZVP optimized geometry (Å).

|     |           |           |           |
|-----|-----------|-----------|-----------|
| 0 1 |           |           |           |
| C   | 1.226378  | -0.589330 | -0.043821 |
| C   | 1.024712  | 0.744501  | 0.021126  |
| C   | -0.986644 | -0.237198 | -0.109102 |
| N   | -0.340261 | 0.943128  | -0.011389 |
| N   | -0.019139 | -1.178428 | -0.114685 |
| C   | -1.003017 | 2.236006  | 0.088109  |
| H   | -0.308763 | 2.949594  | 0.522708  |
| H   | -1.318803 | 2.574943  | -0.896114 |
| H   | -1.872881 | 2.127270  | 0.728283  |
| C   | -0.266318 | -2.612965 | -0.173978 |
| H   | -1.138002 | -2.839661 | 0.430707  |
| H   | -0.456295 | -2.917610 | -1.201466 |
| H   | 0.607456  | -3.129591 | 0.213319  |
| C   | -3.140303 | -0.592003 | 1.359691  |
| H   | -4.207349 | -0.830278 | 1.354252  |
| H   | -2.648805 | -1.352174 | 1.976484  |
| H   | -3.037343 | 0.360175  | 1.894323  |
| B   | -2.588957 | -0.522870 | -0.179407 |
| H   | -2.666677 | -1.614288 | -0.714426 |
| C   | -3.380310 | 0.575883  | -1.090128 |
| H   | -3.578553 | 1.528945  | -0.589539 |
| H   | -2.889457 | 0.803820  | -2.042951 |
| H   | -4.360344 | 0.163907  | -1.344334 |
| Cl  | 2.165807  | 1.990078  | 0.118382  |
| Cl  | 2.686511  | -1.443782 | -0.051504 |

H<sub>1</sub>BMe<sub>2</sub>-NHC 4, T1

E<sub>c</sub> = -1329.23668655 (Hartrees)

M06-2X/def2-TZVP optimized geometry (Å).

|     |           |           |           |
|-----|-----------|-----------|-----------|
| 0 1 |           |           |           |
| C   | 1.115479  | -0.673825 | 0.006769  |
| C   | 1.125320  | 0.658875  | 0.003349  |
| C   | -1.043835 | 0.015459  | 0.107929  |
| N   | -0.170849 | 1.122843  | 0.258546  |
| N   | -0.192681 | -1.131302 | 0.255580  |
| C   | -0.566547 | 2.471291  | -0.065776 |
| H   | -1.408314 | 2.762526  | 0.555594  |
| H   | 0.267176  | 3.136320  | 0.144094  |
| H   | -0.843526 | 2.571153  | -1.122910 |
| C   | -0.599363 | -2.381808 | -0.356169 |
| H   | -0.975191 | -2.205759 | -1.374438 |

|    |           |           |           |
|----|-----------|-----------|-----------|
| H  | 0.261903  | -3.042316 | -0.404780 |
| H  | -1.371579 | -2.867538 | 0.228823  |
| B  | -2.571395 | 0.005487  | 0.043661  |
| H  | -1.501695 | -0.044824 | -1.108448 |
| C  | -3.386781 | -1.341442 | 0.286227  |
| H  | -4.432296 | -1.090330 | 0.473787  |
| H  | -3.383048 | -2.018699 | -0.570166 |
| H  | -3.024570 | -1.903972 | 1.148754  |
| C  | -3.455294 | 1.305759  | -0.196348 |
| H  | -3.761816 | 1.706625  | 0.776863  |
| H  | -3.009717 | 2.119945  | -0.759929 |
| H  | -4.377716 | 1.022320  | -0.707604 |
| Cl | 2.456931  | -1.715201 | 0.013635  |
| Cl | 2.474140  | 1.689346  | -0.002618 |

### H<sub>1</sub>BMe<sub>2</sub>-NHC 4, B

E<sub>e</sub> = -1329.25647743 (Hartrees)

M06-2X/def2-TZVP optimized geometry (Å).

|     |           |           |           |
|-----|-----------|-----------|-----------|
| 0 1 |           |           |           |
| C   | 1.099528  | -0.581725 | -0.077099 |
| C   | 0.945819  | 0.737456  | 0.024804  |
| C   | -1.093438 | -0.144942 | -0.481651 |
| N   | -0.422769 | 1.088037  | 0.011621  |
| N   | -0.147420 | -1.224052 | -0.141340 |
| C   | -0.772087 | 2.282893  | -0.738557 |
| H   | -1.822855 | 2.516313  | -0.582315 |
| H   | -0.179070 | 3.120602  | -0.378038 |
| H   | -0.590693 | 2.149242  | -1.814767 |
| C   | -0.272477 | -2.382932 | -1.002311 |
| H   | -0.114094 | -2.128427 | -2.060441 |
| H   | 0.447425  | -3.142796 | -0.705154 |
| H   | -1.275176 | -2.796959 | -0.888561 |
| B   | -2.502180 | -0.220529 | 0.262723  |
| H   | -1.158314 | -0.075730 | -1.591768 |
| C   | -2.611181 | -1.115662 | 1.535274  |
| H   | -3.572432 | -1.067069 | 2.045481  |
| H   | -2.395043 | -2.159244 | 1.281497  |
| H   | -1.815093 | -0.836979 | 2.233027  |
| C   | -3.697473 | 0.658998  | -0.239983 |
| H   | -3.812063 | 1.500867  | 0.454989  |
| H   | -3.591846 | 1.067912  | -1.245344 |
| H   | -4.639104 | 0.107450  | -0.176192 |
| Cl  | 2.534041  | -1.475840 | 0.118957  |
| Cl  | 2.138219  | 1.892019  | 0.404522  |

### H<sub>1</sub>BMe<sub>2</sub>-NHC 4, T2

E<sub>e</sub> = -1329.25484784 (Hartrees)

M06-2X/def2-TZVP optimized geometry (Å).

|     |           |           |           |
|-----|-----------|-----------|-----------|
| 0 1 |           |           |           |
| C   | 1.083988  | -0.329496 | 0.063251  |
| C   | 0.292226  | 0.719100  | -0.215672 |
| C   | -0.876630 | -1.421610 | -0.264786 |
| N   | -1.034775 | 0.419852  | -0.499750 |
| N   | 0.491308  | -1.568692 | -0.190988 |
| C   | -1.709109 | 1.198215  | -1.532728 |
| H   | -1.078063 | 1.307335  | -2.415507 |
| H   | -2.628397 | 0.687341  | -1.803063 |
| H   | -1.963206 | 2.188501  | -1.148165 |
| C   | 1.163380  | -2.387388 | -1.200921 |
| H   | 0.653623  | -3.345595 | -1.269548 |
| H   | 1.157980  | -1.890623 | -2.176725 |
| H   | 2.191709  | -2.562092 | -0.892119 |
| H   | -1.324429 | -1.995844 | -1.077023 |
| C   | -1.378191 | -0.118290 | 2.143355  |
| H   | -0.307530 | -0.077237 | 2.355167  |
| H   | -1.807323 | 0.843623  | 2.440264  |
| H   | -1.803831 | -0.868500 | 2.815157  |
| C   | -3.340101 | -0.620324 | 0.338432  |
| H   | -3.871476 | 0.324427  | 0.488945  |
| H   | -3.590582 | -0.979944 | -0.664674 |
| H   | -3.772465 | -1.334978 | 1.043327  |
| B   | -1.769093 | -0.470795 | 0.632624  |
| Cl  | 0.797241  | 2.353242  | -0.147953 |
| Cl  | 2.695720  | -0.243936 | 0.617978  |

### H<sub>1</sub>BMe<sub>2</sub>-NHC 4, C

E<sub>e</sub> = -1329.28363823 (Hartrees)

M06-2X/def2-TZVP optimized geometry (Å).

|     |           |           |           |
|-----|-----------|-----------|-----------|
| 0 1 |           |           |           |
| C   | 1.033937  | -0.271919 | -0.017378 |
| C   | 0.216402  | 0.825871  | -0.124858 |
| C   | -0.788626 | -1.725480 | -0.295867 |
| N   | -1.093596 | 0.735930  | -0.286283 |
| N   | 0.495575  | -1.536970 | -0.328191 |
| C   | -1.876322 | 1.887303  | -0.700325 |
| H   | -1.362961 | 2.468255  | -1.464955 |
| H   | -2.818578 | 1.529894  | -1.105324 |
| H   | -2.090936 | 2.543186  | 0.148553  |
| C   | 1.427131  | -2.581315 | -0.774319 |
| H   | 0.843047  | -3.432295 | -1.109196 |
| H   | 2.043980  | -2.197253 | -1.583810 |
| H   | 2.068756  | -2.871614 | 0.053969  |
| H   | -1.098447 | -2.693211 | -0.685377 |
| B   | -1.793150 | -0.591206 | 0.256934  |

|    |           |           |           |
|----|-----------|-----------|-----------|
| C  | -1.785406 | -0.609002 | 1.882094  |
| H  | -2.399030 | 0.210351  | 2.271012  |
| H  | -2.210153 | -1.536880 | 2.276967  |
| H  | -0.785882 | -0.497986 | 2.315157  |
| C  | -3.266989 | -0.803557 | -0.369197 |
| H  | -3.637901 | -1.796326 | -0.096185 |
| H  | -3.993459 | -0.089234 | 0.027958  |
| H  | -3.303336 | -0.738951 | -1.462029 |
| Cl | 0.958639  | 2.394287  | -0.061359 |
| Cl | 2.696423  | -0.198171 | 0.404241  |

H<sub>1</sub>BMe<sub>2</sub>-NHC 4, T3

E<sub>c</sub> = -1329.26102502 (Hartrees)

M06-2X/def2-TZVP optimized geometry (Å).

|     |           |           |           |
|-----|-----------|-----------|-----------|
| 0 1 |           |           |           |
| C   | -1.015654 | -0.374778 | -0.042405 |
| C   | -0.405371 | 0.823040  | 0.018386  |
| C   | 1.031796  | -1.480088 | -0.461086 |
| N   | 0.949275  | 1.008607  | -0.046431 |
| N   | -0.271996 | -1.583443 | -0.162626 |
| C   | 1.537422  | 2.140582  | 0.651194  |
| H   | 1.140441  | 3.086149  | 0.283862  |
| H   | 1.369507  | 2.095958  | 1.733679  |
| H   | 2.609970  | 2.132860  | 0.468547  |
| C   | -0.803987 | -2.791395 | 0.454198  |
| H   | -0.122737 | -3.611698 | 0.239005  |
| H   | -0.885840 | -2.666829 | 1.538049  |
| H   | -1.787147 | -3.024802 | 0.053574  |
| H   | 1.514770  | -2.422422 | -0.699314 |
| B   | 1.811512  | -0.185529 | -0.384356 |
| C   | 3.173391  | 0.041707  | -1.175523 |
| H   | 2.984336  | 0.575484  | -2.109947 |
| H   | 3.901143  | 0.629388  | -0.610184 |
| H   | 3.659419  | -0.902797 | -1.429732 |
| C   | 2.223281  | -1.100297 | 1.147584  |
| H   | 2.643572  | -0.184137 | 1.571799  |
| H   | 1.458756  | -1.456640 | 1.835966  |
| H   | 3.017387  | -1.833842 | 1.035805  |
| Cl  | -2.716255 | -0.552016 | -0.278618 |
| Cl  | -1.386530 | 2.256852  | 0.038617  |

H<sub>1</sub>BMe<sub>2</sub>-NHC 4, D

E<sub>c</sub> = -1329.31821300 (Hartrees)

M06-2X/def2-TZVP optimized geometry (Å).

|     |           |           |           |
|-----|-----------|-----------|-----------|
| 0 1 |           |           |           |
| H   | 1.241539  | -2.559599 | -0.296487 |
| C   | 0.827240  | -1.662810 | 0.173563  |
| C   | -0.948554 | -0.119530 | -0.268129 |
| C   | -0.148140 | 0.944033  | -0.094057 |
| N   | 1.248604  | 0.810153  | -0.226290 |
| N   | -0.416041 | -1.362866 | -0.552870 |
| C   | 1.993680  | 2.008207  | -0.600093 |
| H   | 1.515048  | 2.500948  | -1.447137 |
| H   | 2.045728  | 2.718749  | 0.225151  |
| H   | 3.001063  | 1.721289  | -0.886486 |
| C   | -1.287739 | -2.476234 | -0.865244 |
| H   | -1.837259 | -2.849624 | 0.006599  |
| H   | -2.009602 | -2.190625 | -1.627803 |
| H   | -0.671583 | -3.282857 | -1.261565 |
| B   | 1.838978  | -0.462578 | -0.080156 |
| C   | 3.393741  | -0.697584 | -0.184180 |
| H   | 3.706895  | -0.703896 | -1.233961 |
| H   | 3.982595  | 0.073465  | 0.315565  |
| H   | 3.680762  | -1.663795 | 0.233754  |
| C   | 0.599219  | -1.946124 | 1.663468  |
| H   | -0.061584 | -2.801354 | 1.817393  |
| H   | 1.548128  | -2.160620 | 2.159312  |
| H   | 0.153112  | -1.076121 | 2.150882  |
| Cl  | -2.659530 | 0.008972  | -0.045531 |
| Cl  | -0.746020 | 2.470803  | 0.442455  |

**Cartesian coordinates for optimized insertion pathway compounds H<sub>1</sub>BMe<sub>2</sub>-NHC 5**

H<sub>1</sub>BMe<sub>2</sub>-NHC 5, A

E<sub>c</sub> = -563.732637024 (Hartrees)

M06-2X/def2-TZVP optimized geometry (Å).

0 1

|   |           |           |           |
|---|-----------|-----------|-----------|
| C | -1.205839 | 0.665619  | -0.060843 |
| C | -1.041535 | -0.714955 | 0.019279  |
| C | 1.002665  | 0.228085  | -0.098459 |
| N | 0.324726  | -0.937037 | 0.006058  |
| N | 0.067098  | 1.204229  | -0.126284 |
| C | 0.930570  | -2.249942 | 0.127495  |
| H | 0.271962  | -2.879599 | 0.723014  |
| H | 1.084362  | -2.698979 | -0.853079 |
| H | 1.885509  | -2.151242 | 0.631408  |
| C | 0.307752  | 2.633087  | -0.176373 |
| H | 1.376712  | 2.804983  | -0.129466 |
| H | -0.091590 | 3.044376  | -1.104035 |
| H | -0.185099 | 3.109452  | 0.671356  |
| C | 3.177496  | 0.366700  | 1.380316  |
| H | 4.257972  | 0.533711  | 1.374827  |
| H | 2.740865  | 1.129296  | 2.033324  |
| H | 3.015687  | -0.599818 | 1.872767  |
| B | 2.617691  | 0.420582  | -0.157390 |
| H | 2.790900  | 1.529513  | -0.626548 |
| C | 3.332143  | -0.673839 | -1.139685 |
| H | 3.499527  | -1.657882 | -0.690758 |
| H | 2.803807  | -0.836125 | -2.085797 |
| H | 4.322911  | -0.296480 | -1.405593 |
| C | -2.131824 | -1.569789 | 0.091927  |
| C | -2.461903 | 1.252964  | -0.064525 |
| C | -3.389022 | -0.985956 | 0.086131  |
| C | -3.552229 | 0.400667  | 0.010429  |
| H | -2.012265 | -2.643447 | 0.142672  |
| H | -4.265140 | -1.618281 | 0.137860  |
| H | -4.551062 | 0.815544  | 0.008044  |
| H | -2.585935 | 2.325875  | -0.125614 |

H<sub>1</sub>BMe<sub>2</sub>-NHC 5, T1

E<sub>c</sub> = -563.694497381 (Hartrees)

M06-2X/def2-TZVP optimized geometry (Å).

0 1

|   |           |           |           |
|---|-----------|-----------|-----------|
| C | -1.119531 | -0.688550 | 0.045540  |
| C | -1.127556 | 0.706599  | -0.078334 |
| C | 1.050723  | 0.018317  | 0.016235  |
| N | 0.190446  | 1.129551  | -0.286383 |
| N | 0.200570  | -1.116704 | -0.013226 |

|   |           |           |           |
|---|-----------|-----------|-----------|
| C | 0.587468  | 2.463080  | 0.089964  |
| H | 0.880670  | 2.504082  | 1.149664  |
| H | 1.420360  | 2.806980  | -0.516551 |
| H | -0.247603 | 3.141596  | -0.065231 |
| C | 0.557597  | -2.396674 | -0.579134 |
| H | 0.719810  | -3.163195 | 0.182835  |
| H | -0.245589 | -2.730863 | -1.239719 |
| H | 1.470553  | -2.295031 | -1.163530 |
| B | 2.577055  | -0.021244 | 0.067970  |
| H | 1.464833  | 0.220171  | 1.167445  |
| C | 3.296147  | -1.350488 | 0.548626  |
| H | 3.776237  | -1.834537 | -0.308866 |
| H | 4.103345  | -1.111931 | 1.245541  |
| H | 2.647771  | -2.087870 | 1.021015  |
| C | 3.477274  | 1.245743  | -0.256990 |
| H | 4.531784  | 0.964459  | -0.260493 |
| H | 3.244948  | 1.679953  | -1.232292 |
| H | 3.370299  | 2.045001  | 0.479520  |
| C | -2.313671 | 1.408336  | -0.050279 |
| C | -2.289104 | -1.408274 | 0.154341  |
| C | -3.503928 | 0.682779  | 0.079029  |
| C | -3.494474 | -0.697650 | 0.169307  |
| H | -2.338617 | 2.485668  | -0.143736 |
| H | -4.444856 | 1.215910  | 0.106002  |
| H | -4.427732 | -1.236596 | 0.262746  |
| H | -2.274280 | -2.486824 | 0.243233  |

H<sub>1</sub>BMe<sub>2</sub>-NHC 5, B

E<sub>c</sub> = -563.709514238 (Hartrees)

M06-2X/def2-TZVP optimized geometry (Å).

0 1

|   |           |           |           |
|---|-----------|-----------|-----------|
| C | 1.083084  | -0.675036 | -0.019496 |
| C | 0.986928  | 0.713710  | 0.133562  |
| C | -1.084521 | -0.077665 | -0.488603 |
| N | -0.368645 | 1.083750  | 0.088085  |
| N | -0.205035 | -1.195948 | -0.135297 |
| C | -0.677381 | 2.372902  | -0.491615 |
| H | -1.741475 | 2.581099  | -0.400987 |
| H | -0.140357 | 3.152154  | 0.046380  |
| H | -0.395456 | 2.417756  | -1.553552 |
| C | -0.404091 | -2.416787 | -0.874389 |
| H | -0.117322 | -2.313471 | -1.931290 |
| H | 0.180848  | -3.221236 | -0.429863 |
| H | -1.455259 | -2.703881 | -0.825740 |
| B | -2.517768 | -0.101435 | 0.212905  |
| H | -1.119480 | 0.032507  | -1.597685 |
| C | -2.710161 | -0.989877 | 1.481977  |
| H | -3.603610 | -0.757318 | 2.061665  |
| H | -2.788734 | -2.036407 | 1.159707  |
| H | -1.826625 | -0.956175 | 2.122746  |
| C | -3.681417 | 0.793197  | -0.337922 |

|   |           |           |           |
|---|-----------|-----------|-----------|
| H | -3.859400 | 1.608480  | 0.374105  |
| H | -3.515200 | 1.232051  | -1.322354 |
| H | -4.617393 | 0.226778  | -0.356282 |
| C | 2.309364  | -1.305332 | -0.017299 |
| C | 2.112765  | 1.488945  | 0.300306  |
| C | 3.454318  | -0.520419 | 0.165355  |
| C | 3.358795  | 0.849346  | 0.322174  |
| H | 2.390641  | -2.375547 | -0.155237 |
| H | 4.426037  | -0.996183 | 0.172801  |
| H | 4.255618  | 1.440370  | 0.451455  |
| H | 2.045679  | 2.563687  | 0.405794  |

H<sub>1</sub>BMe<sub>2</sub>-NHC 5, T2

E<sub>c</sub> = -563.703500466 (Hartrees)

M06-2X/def2-TZVP optimized geometry (Å).

|     |           |           |           |
|-----|-----------|-----------|-----------|
| 0 1 |           |           |           |
| C   | -0.974779 | 0.614614  | 0.169909  |
| C   | -0.461420 | -0.612082 | -0.282356 |
| C   | 1.221619  | 1.208229  | -0.140919 |
| N   | 0.900166  | -0.589033 | -0.575148 |
| N   | -0.059243 | 1.673376  | 0.003196  |
| C   | 1.387296  | -1.471504 | -1.622143 |
| H   | 0.693380  | -1.488897 | -2.464576 |
| H   | 2.358226  | -1.123956 | -1.964442 |
| H   | 1.511994  | -2.489374 | -1.239655 |
| C   | -0.512161 | 2.741734  | -0.886870 |
| H   | 0.242966  | 3.524589  | -0.915218 |
| H   | -0.692202 | 2.362851  | -1.898515 |
| H   | -1.434601 | 3.169427  | -0.500571 |
| H   | 1.801858  | 1.753717  | -0.886216 |
| C   | 1.368185  | -0.432269 | 2.100265  |
| H   | 1.506442  | -1.504686 | 2.272462  |
| H   | 1.992987  | 0.083587  | 2.834464  |
| H   | 0.329969  | -0.197804 | 2.344819  |
| C   | 3.392638  | -0.263693 | 0.304952  |
| H   | 3.665218  | -1.323117 | 0.345271  |
| H   | 3.725660  | 0.120936  | -0.664392 |
| H   | 3.994919  | 0.239743  | 1.065633  |
| B   | 1.833231  | -0.033100 | 0.619275  |
| C   | -2.296435 | 0.734800  | 0.564045  |
| C   | -1.311269 | -1.705735 | -0.398684 |
| C   | -3.125973 | -0.374154 | 0.481138  |
| C   | -2.636733 | -1.581099 | -0.007499 |
| H   | -2.672144 | 1.683740  | 0.924616  |
| H   | -4.159063 | -0.295514 | 0.791635  |
| H   | -3.291738 | -2.440266 | -0.068807 |
| H   | -0.932286 | -2.652926 | -0.760239 |

H<sub>1</sub>BMe<sub>2</sub>-NHC 5, C

E<sub>c</sub> = -563.729793206 (Hartrees)

M06-2X/def2-TZVP optimized geometry (Å).

|     |           |           |           |
|-----|-----------|-----------|-----------|
| 0 1 |           |           |           |
| C   | -1.025385 | 0.561057  | -0.000020 |
| C   | -0.513167 | -0.770296 | -0.000114 |
| C   | 1.178160  | 1.455180  | -0.000015 |
| N   | 0.804764  | -1.031031 | -0.000274 |
| N   | -0.098361 | 1.655223  | -0.000119 |
| C   | 1.226519  | -2.414770 | -0.000380 |
| H   | 0.870653  | -2.950769 | -0.887032 |
| H   | 2.312809  | -2.448655 | -0.000432 |
| H   | 0.870726  | -2.950844 | 0.886263  |
| C   | -0.644656 | 3.014597  | -0.000287 |
| H   | 0.183674  | 3.715083  | -0.000506 |
| H   | -1.255010 | 3.166297  | -0.888811 |
| H   | -1.254803 | 3.166603  | 0.888331  |
| H   | 1.763821  | 2.373395  | -0.000053 |
| B   | 1.924729  | 0.053778  | 0.000142  |
| C   | 2.847833  | -0.004114 | 1.348828  |
| H   | 3.438676  | -0.925082 | 1.370757  |
| H   | 3.567494  | 0.820114  | 1.387540  |
| H   | 2.261035  | 0.025769  | 2.271758  |
| C   | 2.848494  | -0.003960 | -1.348108 |
| H   | 3.568362  | 0.820106  | -1.386350 |
| H   | 3.439109  | -0.925074 | -1.370012 |
| H   | 2.262075  | 0.026286  | -2.271269 |
| C   | -1.493722 | -1.794043 | -0.000053 |
| C   | -2.389290 | 0.816574  | 0.000124  |
| C   | -2.844954 | -1.518587 | 0.000064  |
| C   | -3.315415 | -0.211992 | 0.000188  |
| H   | -3.545562 | -2.344525 | 0.000118  |
| H   | -1.172660 | -2.823995 | -0.000135 |
| H   | -4.373372 | 0.005498  | 0.000296  |
| H   | -2.751999 | 1.833682  | 0.000211  |

H<sub>1</sub>BMe<sub>2</sub>-NHC 5, T3

E<sub>c</sub> = -563.715542289 (Hartrees)

M06-2X/def2-TZVP optimized geometry (Å).

|     |           |           |           |
|-----|-----------|-----------|-----------|
| 0 1 |           |           |           |
| C   | -0.955757 | 0.576108  | 0.156949  |
| C   | -0.555818 | -0.787496 | 0.067350  |
| C   | 1.321001  | 1.272086  | 0.366301  |
| N   | 0.774428  | -1.154138 | 0.111495  |
| N   | 0.025034  | 1.601523  | 0.289555  |
| C   | 1.090366  | -2.553199 | -0.060545 |
| H   | 0.736765  | -2.940339 | -1.023890 |
| H   | 2.168399  | -2.682441 | -0.017672 |
| H   | 0.646427  | -3.170191 | 0.728142  |

|   |           |           |           |   |          |           |           |
|---|-----------|-----------|-----------|---|----------|-----------|-----------|
| C | -0.380742 | 2.981528  | 0.095488  | C | 1.629377 | -1.685246 | 0.225625  |
| H | 0.505170  | 3.610053  | 0.129933  | C | 2.940598 | -1.232357 | 0.337673  |
| H | -0.871959 | 3.110408  | -0.872698 | C | 3.206994 | 0.110830  | 0.172706  |
| H | -1.067362 | 3.301882  | 0.880320  | H | 2.399315 | 2.046549  | -0.212969 |
| H | 1.989401  | 2.107742  | 0.540725  | H | 4.218109 | 0.486794  | 0.258835  |
| B | 1.851351  | -0.125668 | 0.193695  | H | 3.734697 | -1.934374 | 0.552540  |
| C | 3.297494  | -0.529875 | 0.728075  | H | 1.431547 | -2.738398 | 0.360309  |
| H | 3.842626  | -1.175166 | 0.033897  |   |          |           |           |
| H | 3.922352  | 0.350221  | 0.895780  |   |          |           |           |
| H | 3.226502  | -1.065308 | 1.678682  |   |          |           |           |
| C | 2.143484  | 0.714992  | -1.442092 |   |          |           |           |
| H | 3.048197  | 1.315502  | -1.499380 |   |          |           |           |
| H | 2.334496  | -0.264968 | -1.886427 |   |          |           |           |
| H | 1.326841  | 1.179800  | -1.991397 |   |          |           |           |
| C | -2.296627 | 0.914588  | 0.106263  |   |          |           |           |
| C | -1.577304 | -1.734172 | -0.067262 |   |          |           |           |
| C | -2.920234 | -1.376325 | -0.111338 |   |          |           |           |
| C | -3.290873 | -0.052615 | -0.025075 |   |          |           |           |
| H | -2.591174 | 1.951749  | 0.171639  |   |          |           |           |
| H | -4.329927 | 0.243486  | -0.062547 |   |          |           |           |
| H | -3.669129 | -2.150279 | -0.220453 |   |          |           |           |
| H | -1.320549 | -2.779230 | -0.145176 |   |          |           |           |

### H<sub>1</sub>BMe<sub>2</sub>-NHC 5, D

E<sub>c</sub> = -563.772789867 (Hartrees)

M06-2X/def2-TZVP optimized geometry (Å).

|     |           |           |           |  |  |  |  |
|-----|-----------|-----------|-----------|--|--|--|--|
| 0 1 |           |           |           |  |  |  |  |
| H   | -2.227233 | 1.697677  | -0.593955 |  |  |  |  |
| C   | -1.501781 | 1.135869  | 0.004294  |  |  |  |  |
| C   | 0.851287  | 0.562901  | -0.223511 |  |  |  |  |
| C   | 0.582195  | -0.818949 | -0.051701 |  |  |  |  |
| N   | -0.747089 | -1.287222 | -0.188187 |  |  |  |  |
| N   | -0.183263 | 1.427049  | -0.555609 |  |  |  |  |
| C   | -0.924636 | -2.726703 | -0.290420 |  |  |  |  |
| H   | -0.272236 | -3.136924 | -1.063546 |  |  |  |  |
| H   | -0.696413 | -3.229281 | 0.653241  |  |  |  |  |
| H   | -1.954789 | -2.944485 | -0.554455 |  |  |  |  |
| C   | 0.131252  | 2.827479  | -0.717563 |  |  |  |  |
| H   | 0.502087  | 3.298748  | 0.203039  |  |  |  |  |
| H   | 0.885055  | 2.960106  | -1.494711 |  |  |  |  |
| H   | -0.773582 | 3.348869  | -1.028418 |  |  |  |  |
| B   | -1.838076 | -0.400567 | -0.141019 |  |  |  |  |
| C   | -3.337251 | -0.893540 | -0.178009 |  |  |  |  |
| H   | -3.585127 | -1.313291 | -1.158293 |  |  |  |  |
| H   | -3.539276 | -1.678048 | 0.555244  |  |  |  |  |
| H   | -4.037389 | -0.077732 | 0.006062  |  |  |  |  |
| C   | -1.640987 | 1.582962  | 1.469480  |  |  |  |  |
| H   | -1.498557 | 2.659921  | 1.577409  |  |  |  |  |
| H   | -2.632582 | 1.336658  | 1.854782  |  |  |  |  |
| H   | -0.898894 | 1.076716  | 2.091557  |  |  |  |  |
| C   | 2.170971  | 0.997511  | -0.097740 |  |  |  |  |



**Cartesian coordinates for optimized insertion  
pathway compounds BMe<sub>3</sub>-NHC 1**

BMe<sub>3</sub>-NHC 1, A

E<sub>c</sub> = -449.400691936 (Hartrees)

M06-2X/def2-TZVP optimized geometry (Å).

0 1

|   |           |           |           |
|---|-----------|-----------|-----------|
| C | 2.337695  | -0.754982 | -0.022613 |
| C | 2.399673  | 0.590200  | -0.032003 |
| C | 0.220537  | 0.016925  | -0.054008 |
| H | 3.113272  | -1.499176 | -0.007145 |
| H | 3.240648  | 1.259475  | -0.026192 |
| N | 1.099462  | 1.044444  | -0.050187 |
| N | 1.002168  | -1.086641 | -0.032747 |
| C | 0.769557  | 2.461483  | 0.000231  |
| H | 1.702803  | 3.019131  | 0.019663  |
| H | 0.187727  | 2.747710  | -0.869798 |
| H | 0.198447  | 2.678777  | 0.899092  |
| C | 0.533559  | -2.463250 | 0.010696  |
| H | -0.267448 | -2.551806 | 0.737852  |
| H | 0.165979  | -2.773061 | -0.964339 |
| H | 1.369630  | -3.092185 | 0.307828  |
| C | -1.822949 | -0.190969 | 1.581858  |
| H | -2.913636 | -0.205189 | 1.678227  |
| H | -1.461711 | -1.133160 | 2.010418  |
| H | -1.460381 | 0.611754  | 2.234369  |
| B | -1.432159 | 0.041715  | 0.005930  |
| C | -2.054122 | 1.464840  | -0.514520 |
| H | -1.868726 | 2.328738  | 0.129569  |
| H | -1.759211 | 1.738278  | -1.534977 |
| H | -3.141186 | 1.344210  | -0.538769 |
| C | -2.043635 | -1.143757 | -0.955081 |
| H | -3.096375 | -0.914492 | -1.143675 |
| H | -1.567640 | -1.205507 | -1.941697 |
| H | -2.034695 | -2.149624 | -0.526901 |

BMe<sub>3</sub>-NHC 1, T1

E<sub>c</sub> = -449.337861207 (Hartrees)

M06-2X/def2-TZVP optimized geometry (Å).

0 1

|   |          |           |           |
|---|----------|-----------|-----------|
| C | 2.213730 | -0.682604 | -0.100634 |
| C | 2.228528 | 0.650448  | -0.081334 |
| C | 0.035151 | 0.010990  | -0.117371 |
| H | 3.027169 | -1.383984 | -0.039678 |
| H | 3.056105 | 1.334654  | -0.010244 |
| N | 0.926161 | 1.102158  | -0.312262 |
| N | 0.898947 | -1.109996 | -0.359864 |
| C | 0.568817 | 2.491282  | -0.270290 |
| H | 1.448350 | 3.074984  | -0.539962 |

|   |           |           |           |
|---|-----------|-----------|-----------|
| H | -0.214706 | 2.704218  | -0.996393 |
| H | 0.228959  | 2.824526  | 0.717851  |
| C | 0.524113  | -2.462988 | -0.025280 |
| H | 0.132709  | -2.550092 | 0.995594  |
| H | -0.219164 | -2.849413 | -0.717533 |
| H | 1.412104  | -3.088825 | -0.101848 |
| C | -0.429029 | -0.001101 | 1.612718  |
| H | -1.264896 | -0.604919 | 1.966111  |
| H | 0.495125  | -0.414744 | 2.016158  |
| H | -0.555940 | 1.022905  | 1.949832  |
| B | -1.492984 | 0.010115  | -0.205017 |
| C | -2.382453 | 1.320136  | -0.084001 |
| H | -1.913737 | 2.216583  | 0.312544  |
| H | -2.776401 | 1.561924  | -1.078026 |
| H | -3.258963 | 1.102884  | 0.533855  |
| C | -2.313246 | -1.322526 | -0.511052 |
| H | -3.385687 | -1.119553 | -0.523597 |
| H | -2.046382 | -1.719402 | -1.495200 |
| H | -2.149144 | -2.129275 | 0.203975  |

BMe<sub>3</sub>-NHC 1, B

E<sub>c</sub> = -449.370106531 (Hartrees)

M06-2X/def2-TZVP optimized geometry (Å).

0 1

|   |           |           |           |
|---|-----------|-----------|-----------|
| C | 1.500068  | 0.940919  | -0.899364 |
| C | 0.371866  | 0.791703  | -1.589521 |
| C | 0.195201  | -0.413374 | 0.448374  |
| H | 2.359186  | 1.532532  | -1.179998 |
| H | 0.078295  | 1.226150  | -2.529397 |
| N | -0.548440 | -0.043260 | -0.864208 |
| N | 1.475285  | 0.298789  | 0.319200  |
| C | -1.177220 | -1.080481 | -1.679883 |
| H | -1.897011 | -1.638625 | -1.088901 |
| H | -1.704983 | -0.595742 | -2.501600 |
| H | -0.425654 | -1.758100 | -2.089970 |
| C | 2.694079  | -0.257356 | 0.862378  |
| H | 2.996046  | -1.200320 | 0.390632  |
| H | 3.493813  | 0.468810  | 0.719292  |
| H | 2.583165  | -0.423136 | 1.933866  |
| B | -1.129756 | 0.448103  | 0.600405  |
| C | -1.037203 | 2.017825  | 0.859267  |
| H | -1.778439 | 2.566341  | 0.269620  |
| H | -1.264248 | 2.222146  | 1.909463  |
| H | -0.058509 | 2.452336  | 0.652474  |
| C | -2.505950 | -0.255653 | 1.021399  |
| H | -3.342686 | 0.124629  | 0.426168  |
| H | -2.540949 | -1.346156 | 0.966994  |
| H | -2.728551 | 0.005360  | 2.059625  |
| C | 0.337574  | -1.888045 | 0.718940  |
| H | 0.939197  | -2.401229 | -0.037170 |
| H | 0.818946  | -2.031177 | 1.686856  |
| H | -0.637246 | -2.366268 | 0.775531  |

BMe<sub>3</sub>-NHC 1, T2E<sub>c</sub> = -449.364234075 (Hartrees)

M06-2X/def2-TZVP optimized geometry (Å).

0 1

|   |           |           |           |
|---|-----------|-----------|-----------|
| C | 1.385594  | -1.362686 | 0.110395  |
| C | 0.291568  | -1.530079 | 0.860531  |
| C | 0.311433  | 0.643360  | -0.310779 |
| H | 2.180218  | -2.078488 | -0.032276 |
| H | 0.071633  | -2.391897 | 1.473185  |
| N | -0.622227 | -0.472813 | 0.788519  |
| N | 1.500451  | -0.090637 | -0.451342 |
| C | 2.799554  | 0.540168  | -0.259965 |
| H | 3.000387  | 0.785052  | 0.788510  |
| H | 3.564910  | -0.154714 | -0.603548 |
| H | 2.869788  | 1.444841  | -0.860409 |
| B | -1.079397 | -0.018164 | -0.683002 |
| C | -1.148518 | -1.187178 | -1.777471 |
| H | -1.862538 | -1.961901 | -1.478398 |
| H | -1.511918 | -0.778331 | -2.724631 |
| H | -0.198173 | -1.682265 | -1.984701 |
| C | -2.381638 | 0.927597  | -0.649364 |
| H | -3.291913 | 0.319973  | -0.640565 |
| H | -2.459456 | 1.622083  | 0.191273  |
| H | -2.424687 | 1.530339  | -1.561340 |
| C | 0.457936  | 2.061073  | 0.152121  |
| H | 1.133529  | 2.178845  | 1.002322  |
| H | 0.847942  | 2.661820  | -0.673783 |
| H | -0.515030 | 2.473090  | 0.405745  |
| C | -1.324606 | -0.090080 | 2.005478  |
| H | -2.389425 | -0.312873 | 1.923879  |
| H | -0.899026 | -0.615154 | 2.861540  |
| H | -1.214757 | 0.981498  | 2.182294  |

BMe<sub>3</sub>-NHC 1, CE<sub>c</sub> = -449.400245572 (Hartrees)

M06-2X/def2-TZVP optimized geometry (Å).

0 1

|   |           |           |           |
|---|-----------|-----------|-----------|
| C | -0.840797 | -1.787122 | 0.130170  |
| C | 0.512684  | -1.843091 | 0.007833  |
| C | -0.857757 | 0.581941  | -0.070551 |
| H | -1.458311 | -2.657774 | 0.243468  |
| H | 0.975523  | -2.826345 | 0.013620  |
| N | 1.297519  | -0.786250 | -0.142870 |
| N | -1.503975 | -0.545845 | -0.009946 |
| C | 2.714666  | -0.970835 | -0.357362 |
| H | 2.977347  | -2.028918 | -0.312768 |
| H | 3.015662  | -0.579940 | -1.332345 |
| H | 3.288280  | -0.436797 | 0.404980  |
| C | -2.966717 | -0.618473 | -0.105517 |

|   |           |           |           |
|---|-----------|-----------|-----------|
| H | -3.316722 | -0.016343 | -0.940426 |
| H | -3.255670 | -1.651555 | -0.267104 |
| H | -3.419573 | -0.256474 | 0.816995  |
| B | 0.757125  | 0.669458  | 0.114787  |
| C | 1.039711  | 1.121065  | 1.661947  |
| H | 2.113786  | 1.196181  | 1.861243  |
| H | 0.618009  | 2.105560  | 1.891029  |
| H | 0.625213  | 0.411524  | 2.385914  |
| C | 1.406039  | 1.711611  | -0.953590 |
| H | 1.008247  | 2.724437  | -0.843143 |
| H | 2.486408  | 1.801096  | -0.802262 |
| H | 1.250644  | 1.413836  | -1.996625 |
| C | -1.637633 | 1.844316  | -0.256594 |
| H | -1.834778 | 2.005788  | -1.322120 |
| H | -2.592977 | 1.850455  | 0.268072  |
| H | -1.042699 | 2.686164  | 0.089231  |

BMe<sub>3</sub>-NHC 1, T3E<sub>c</sub> = -449.372952979 (Hartrees)

M06-2X/def2-TZVP optimized geometry (Å).

0 1

|   |           |           |           |
|---|-----------|-----------|-----------|
| C | -0.643691 | -1.819637 | -0.175422 |
| C | 0.691338  | -1.804588 | -0.149075 |
| C | -0.774718 | 0.562109  | -0.281716 |
| H | -1.196677 | -2.744889 | -0.166121 |
| H | 1.217363  | -2.750908 | -0.092194 |
| N | 1.458816  | -0.665236 | -0.252040 |
| N | -1.423281 | -0.636777 | -0.302669 |
| C | 2.856995  | -0.785430 | 0.098104  |
| H | 3.254065  | -1.735546 | -0.265636 |
| H | 3.428492  | 0.014901  | -0.369790 |
| H | 3.036006  | -0.741404 | 1.181890  |
| C | -2.804399 | -0.762552 | 0.130168  |
| H | -3.428544 | -0.003810 | -0.334517 |
| H | -3.176638 | -1.738056 | -0.177432 |
| H | -2.899042 | -0.685330 | 1.220426  |
| B | 0.743938  | 0.641733  | -0.171777 |
| C | 0.017268  | 0.942644  | 1.559162  |
| H | 0.983230  | 0.650800  | 1.977594  |
| H | -0.161594 | 1.997380  | 1.748072  |
| H | -0.745594 | 0.327112  | 2.033195  |
| C | 1.602771  | 1.940737  | -0.505051 |
| H | 1.030211  | 2.867712  | -0.516918 |
| H | 2.409578  | 2.080535  | 0.220207  |
| H | 2.075001  | 1.834129  | -1.486252 |
| C | -1.643703 | 1.774937  | -0.456292 |
| H | -2.170758 | 1.690491  | -1.409566 |
| H | -2.391344 | 1.874579  | 0.333076  |
| H | -1.043354 | 2.678400  | -0.473450 |

BMe<sub>3</sub>-NHC 1, DE<sub>c</sub> = -449.426572849 (Hartrees)

M06-2X/def2-TZVP optimized geometry (Å).

0 1

|   |           |           |           |
|---|-----------|-----------|-----------|
| C | 0.740600  | 0.586274  | 0.130230  |
| C | 0.430911  | -1.809332 | -0.080570 |
| C | -0.887151 | -1.730127 | 0.116933  |
| H | 0.927952  | -2.768564 | -0.023185 |
| H | -1.478463 | -2.605125 | 0.341288  |
| N | -1.572956 | -0.503067 | -0.016503 |
| N | 1.211582  | -0.713675 | -0.397158 |
| C | -3.015904 | -0.646620 | -0.100326 |
| H | -3.292788 | -1.241934 | -0.973885 |
| H | -3.398115 | -1.151789 | 0.790565  |
| H | -3.492696 | 0.324685  | -0.176280 |
| C | 2.642118  | -0.938681 | -0.457053 |
| H | 3.137161  | -0.823591 | 0.515903  |
| H | 2.825410  | -1.950945 | -0.814380 |
| H | 3.109155  | -0.253136 | -1.162857 |
| B | -0.849939 | 0.696686  | -0.105179 |
| C | -1.508495 | 2.113661  | -0.325099 |
| H | -1.168063 | 2.531051  | -1.277991 |
| H | -2.596233 | 2.139039  | -0.328026 |
| H | -1.165389 | 2.815086  | 0.441498  |
| C | 0.978837  | 0.680304  | 1.650733  |
| H | 2.044433  | 0.668444  | 1.894652  |
| H | 0.565003  | 1.612827  | 2.041450  |
| H | 0.494508  | -0.151064 | 2.167524  |
| C | 1.490746  | 1.718997  | -0.567222 |
| H | 1.399516  | 1.640273  | -1.652955 |
| H | 1.085939  | 2.682512  | -0.258570 |
| H | 2.552011  | 1.719141  | -0.308968 |

Cartesian coordinates for optimized insertion pathway compounds BMe<sub>3</sub>-NHC 2BMe<sub>3</sub>-NHC 2, AE<sub>c</sub> = -450.593146785 (Hartrees)

M06-2X/def2-TZVP optimized geometry (Å).

0 1

|   |           |           |           |
|---|-----------|-----------|-----------|
| C | 2.335467  | -0.819167 | -0.082015 |
| C | 2.401763  | 0.689220  | 0.095891  |
| C | 0.166804  | 0.038882  | -0.019837 |
| H | 2.913426  | -1.369379 | 0.660434  |
| H | 2.721064  | 0.975605  | 1.103446  |
| N | 1.007679  | 1.078586  | -0.107797 |
| N | 0.909039  | -1.074368 | 0.077562  |
| C | 0.699072  | 2.491220  | -0.035452 |
| H | 1.510302  | 3.036101  | -0.518890 |
| H | -0.226433 | 2.706639  | -0.550381 |
| H | 0.621630  | 2.827841  | 1.001916  |
| C | 0.468076  | -2.447525 | -0.003567 |
| H | -0.580676 | -2.520795 | 0.246633  |
| H | 0.625134  | -2.841717 | -1.011976 |
| H | 1.050112  | -3.044415 | 0.701002  |
| C | -1.927657 | -0.624968 | 1.450118  |
| H | -3.014306 | -0.757685 | 1.449279  |
| H | -1.498367 | -1.590284 | 1.731621  |
| H | -1.701858 | 0.061420  | 2.273823  |
| B | -1.490037 | 0.021165  | 0.001517  |
| C | -2.198473 | 1.491543  | -0.089697 |
| H | -1.932382 | 2.189460  | 0.710627  |
| H | -2.070543 | 2.005494  | -1.049153 |
| H | -3.274815 | 1.318534  | 0.010151  |
| C | -1.999882 | -0.836434 | -1.303899 |
| H | -3.094163 | -0.806607 | -1.316047 |
| H | -1.671788 | -0.377894 | -2.243869 |
| H | -1.724877 | -1.892490 | -1.358017 |
| H | 3.050259  | 1.183521  | -0.626682 |
| H | 2.660415  | -1.135325 | -1.079108 |

BMe<sub>3</sub>-NHC 2, T1E<sub>c</sub> = -450.552093564 (Hartrees)

M06-2X/def2-TZVP optimized geometry (Å).

0 1

|   |           |           |           |
|---|-----------|-----------|-----------|
| C | 2.175402  | -0.765325 | 0.081681  |
| C | 2.175398  | 0.765298  | 0.081724  |
| C | -0.005970 | 0.000001  | -0.195933 |
| H | 2.318130  | -1.160822 | 1.098164  |
| H | 2.318074  | 1.160740  | 1.098238  |
| N | 0.858979  | 1.099348  | -0.441974 |

|   |           |           |           |
|---|-----------|-----------|-----------|
| N | 0.858958  | -1.099361 | -0.441978 |
| C | 0.482198  | 2.476149  | -0.283111 |
| H | 1.332787  | 3.090074  | -0.584113 |
| H | -0.356939 | 2.727067  | -0.925239 |
| H | 0.229580  | 2.747630  | 0.754025  |
| C | 0.482160  | -2.476152 | -0.283056 |
| H | 0.229537  | -2.747583 | 0.754092  |
| H | -0.356977 | -2.727094 | -0.925173 |
| H | 1.332743  | -3.090100 | -0.584029 |
| C | -0.500922 | 0.000019  | 1.549378  |
| H | -1.538073 | -0.000061 | 1.893198  |
| H | -0.032457 | -0.899011 | 1.941381  |
| H | -0.032607 | 0.899142  | 1.941347  |
| B | -1.533923 | 0.000006  | -0.152551 |
| C | -2.395881 | 1.345413  | -0.216264 |
| H | -2.007372 | 2.180259  | 0.364721  |
| H | -2.479838 | 1.689092  | -1.252329 |
| H | -3.413853 | 1.157600  | 0.131655  |
| C | -2.395884 | -1.345398 | -0.216320 |
| H | -3.413902 | -1.157566 | 0.131453  |
| H | -2.479700 | -1.689142 | -1.252373 |
| H | -2.007451 | -2.180211 | 0.364768  |
| H | 2.951695  | 1.195071  | -0.553927 |
| H | 2.951672  | -1.195056 | -0.554032 |

BMe<sub>3</sub>-NHC 2, B

E<sub>c</sub> = -450.587145017 (Hartrees)

M06-2X/def2-TZVP optimized geometry (Å).

|     |           |           |           |
|-----|-----------|-----------|-----------|
| 0 1 |           |           |           |
| C   | -1.754891 | 0.662581  | -0.904451 |
| C   | -0.402622 | 1.032644  | -1.488823 |
| C   | -0.149468 | -0.218097 | 0.568586  |
| H   | -2.496281 | 0.421694  | -1.668540 |
| H   | -0.150531 | 0.395670  | -2.334728 |
| N   | 0.530508  | 0.764831  | -0.369144 |
| N   | -1.409636 | -0.509956 | -0.130321 |
| C   | 1.129886  | 1.978740  | 0.176809  |
| H   | 1.803991  | 1.735911  | 0.990953  |
| H   | 1.706478  | 2.463976  | -0.610722 |
| H   | 0.361517  | 2.669348  | 0.536045  |
| C   | -2.475781 | -1.069873 | 0.661153  |
| H   | -2.883501 | -0.376248 | 1.413202  |
| H   | -3.291514 | -1.365475 | -0.000302 |
| H   | -2.121104 | -1.964309 | 1.174699  |
| B   | 1.195277  | -0.736184 | -0.111469 |
| C   | 1.130784  | -1.710419 | -1.371749 |
| H   | 1.815148  | -1.392909 | -2.165867 |
| H   | 1.457351  | -2.709786 | -1.071035 |
| H   | 0.133221  | -1.816669 | -1.800026 |
| C   | 2.584314  | -0.706891 | 0.685716  |
| H   | 3.393108  | -0.300923 | 0.069182  |

|   |           |           |           |
|---|-----------|-----------|-----------|
| H | 2.593352  | -0.163369 | 1.633299  |
| H | 2.870055  | -1.735626 | 0.921312  |
| C | -0.308837 | 0.260398  | 1.993534  |
| H | -0.984762 | 1.117515  | 2.082250  |
| H | -0.719769 | -0.550067 | 2.596304  |
| H | 0.648462  | 0.526647  | 2.435964  |
| H | -0.325700 | 2.077538  | -1.786391 |
| H | -2.152314 | 1.489380  | -0.286650 |

BMe<sub>3</sub>-NHC 2, T2

E<sub>c</sub> = -450.577798573 (Hartrees)

M06-2X/def2-TZVP optimized geometry (Å).

|     |           |           |           |
|-----|-----------|-----------|-----------|
| 0 1 |           |           |           |
| C   | 1.245963  | 1.340190  | 0.612495  |
| C   | 0.299254  | 1.685238  | -0.567530 |
| C   | 0.380324  | -0.806740 | 0.362004  |
| H   | 0.771093  | 1.577799  | 1.557643  |
| H   | -0.219026 | 2.620171  | -0.317085 |
| N   | -0.599907 | 0.586148  | -0.764765 |
| N   | 1.505316  | -0.088404 | 0.541868  |
| C   | -1.249139 | 0.536953  | -2.051113 |
| H   | -1.746342 | -0.421120 | -2.185749 |
| H   | -2.009247 | 1.322533  | -2.162083 |
| H   | -0.520302 | 0.664354  | -2.859121 |
| C   | 2.745187  | -0.451498 | -0.134941 |
| H   | 2.668243  | -0.308572 | -1.219754 |
| H   | 3.548698  | 0.174088  | 0.247756  |
| H   | 2.999881  | -1.489479 | 0.062434  |
| B   | -1.100299 | -0.148010 | 0.536906  |
| C   | -1.464965 | 0.779353  | 1.830966  |
| H   | -2.505850 | 0.625938  | 2.126951  |
| H   | -0.858100 | 0.539619  | 2.710222  |
| H   | -1.356361 | 1.854589  | 1.656128  |
| C   | -2.305513 | -1.182042 | 0.237311  |
| H   | -3.236133 | -0.623502 | 0.095185  |
| H   | -2.196500 | -1.833779 | -0.632948 |
| H   | -2.466761 | -1.830729 | 1.104452  |
| C   | 0.571349  | -2.188155 | -0.193188 |
| H   | 1.076136  | -2.189446 | -1.161565 |
| H   | 1.197669  | -2.755927 | 0.500636  |
| H   | -0.376433 | -2.704951 | -0.285767 |
| H   | 0.876282  | 1.863568  | -1.483228 |
| H   | 2.181921  | 1.890890  | 0.545612  |

BMe<sub>3</sub>-NHC 2, C

E<sub>c</sub> = -450.598345702 (Hartrees)

M06-2X/def2-TZVP optimized geometry (Å).

0 1

|   |           |           |           |
|---|-----------|-----------|-----------|
| C | -0.869303 | -1.809235 | -0.118519 |
| C | 0.563380  | -1.761150 | 0.361580  |
| C | -0.839866 | 0.608120  | 0.056582  |
| H | -0.912917 | -2.147246 | -1.156561 |
| H | 0.996841  | -2.752736 | 0.187997  |
| N | 1.285201  | -0.753236 | -0.360170 |
| N | -1.523226 | -0.490610 | -0.051755 |
| C | 2.713092  | -0.935063 | -0.219245 |
| H | 3.024120  | -1.897846 | -0.638820 |
| H | 3.242580  | -0.149817 | -0.759490 |
| H | 3.053776  | -0.903307 | 0.829493  |
| C | -2.981945 | -0.559837 | -0.113026 |
| H | -3.396839 | 0.345635  | -0.543529 |
| H | -3.258621 | -1.407161 | -0.737839 |
| H | -3.394808 | -0.712008 | 0.886040  |
| B | 0.775950  | 0.668633  | -0.030669 |
| C | 1.345029  | 1.252005  | 1.398535  |
| H | 2.414186  | 1.460981  | 1.296502  |
| H | 0.879575  | 2.190603  | 1.712455  |
| H | 1.237093  | 0.548456  | 2.231379  |
| C | 1.101034  | 1.708249  | -1.256191 |
| H | 0.790511  | 2.737783  | -1.055436 |
| H | 2.182772  | 1.741590  | -1.413675 |
| H | 0.652345  | 1.397055  | -2.204600 |
| C | -1.604984 | 1.887708  | 0.192944  |
| H | -2.029845 | 2.164750  | -0.776792 |
| H | -2.421790 | 1.810709  | 0.912219  |
| H | -0.932336 | 2.683335  | 0.496590  |
| H | 0.568633  | -1.604776 | 1.458911  |
| H | -1.467479 | -2.487030 | 0.496022  |

BMe<sub>3</sub>-NHC 2, T3

E<sub>c</sub> = -450.584229569 (Hartrees)

M06-2X/def2-TZVP optimized geometry (Å).

0 1

|   |           |           |           |
|---|-----------|-----------|-----------|
| C | -0.658928 | -1.810943 | 0.154018  |
| C | 0.770647  | -1.786871 | -0.343065 |
| C | -0.755217 | 0.555770  | -0.317667 |
| H | -1.174554 | -2.692489 | -0.233138 |
| H | 0.764277  | -1.835752 | -1.446676 |
| N | 1.465918  | -0.627158 | 0.151555  |
| N | -1.407023 | -0.631794 | -0.261454 |
| C | 2.890668  | -0.704141 | -0.067484 |
| H | 3.291627  | -1.624702 | 0.369069  |
| H | 3.166879  | -0.700560 | -1.134560 |
| H | 3.397840  | 0.134421  | 0.406985  |
| C | -2.825359 | -0.707679 | 0.042919  |
| H | -3.397030 | -0.015924 | -0.570435 |
| H | -3.175704 | -1.716751 | -0.169434 |
| H | -3.025947 | -0.490371 | 1.099816  |
| B | 0.747096  | 0.666132  | -0.005751 |

|   |           |           |           |
|---|-----------|-----------|-----------|
| C | -0.131849 | 1.157377  | 1.564165  |
| H | 0.787500  | 1.002986  | 2.128126  |
| H | -0.411938 | 2.207682  | 1.591743  |
| H | -0.909100 | 0.544845  | 2.022785  |
| C | 1.613620  | 1.946602  | -0.421705 |
| H | 1.037278  | 2.865214  | -0.535358 |
| H | 2.381673  | 2.157303  | 0.327854  |
| H | 2.138880  | 1.772772  | -1.365580 |
| C | -1.599380 | 1.739256  | -0.698508 |
| H | -2.050276 | 1.549751  | -1.675299 |
| H | -2.406962 | 1.924296  | 0.013276  |
| H | -0.992868 | 2.635681  | -0.768165 |
| H | 1.262831  | -2.700374 | 0.009784  |
| H | -0.657363 | -1.872254 | 1.251222  |

BMe<sub>3</sub>-NHC 2, D

E<sub>c</sub> = -450.639902105 (Hartrees)

M06-2X/def2-TZVP optimized geometry (Å).

0 1

|   |           |           |           |
|---|-----------|-----------|-----------|
| C | 0.765686  | 0.634861  | -0.030487 |
| C | 0.489242  | -1.750147 | 0.371159  |
| C | -0.943672 | -1.803640 | -0.107032 |
| H | 0.955771  | -2.720581 | 0.188030  |
| H | -1.507914 | -2.505810 | 0.516975  |
| N | -1.574042 | -0.496608 | -0.029950 |
| N | 1.235819  | -0.734652 | -0.340360 |
| C | -3.018278 | -0.567403 | -0.121537 |
| H | -3.313834 | -1.115123 | -1.022040 |
| H | -3.439698 | -1.093582 | 0.740895  |
| H | -3.452260 | 0.427335  | -0.170107 |
| C | 2.663111  | -0.944824 | -0.182823 |
| H | 2.985821  | -0.968113 | 0.869519  |
| H | 2.936942  | -1.897965 | -0.638509 |
| H | 3.224239  | -0.161974 | -0.690577 |
| B | -0.834991 | 0.686663  | 0.051409  |
| C | -1.574453 | 2.084931  | 0.180230  |
| H | -2.071347 | 2.346857  | -0.759614 |
| H | -2.350926 | 2.070226  | 0.948685  |
| H | -0.897566 | 2.905596  | 0.416456  |
| C | 1.365669  | 1.178331  | 1.280873  |
| H | 2.441129  | 1.347213  | 1.184205  |
| H | 0.909453  | 2.131657  | 1.550232  |
| H | 1.204905  | 0.489542  | 2.113600  |
| C | 1.176452  | 1.555691  | -1.188921 |
| H | 0.760063  | 1.192263  | -2.129971 |
| H | 0.826793  | 2.575120  | -1.021921 |
| H | 2.262585  | 1.600844  | -1.296003 |
| H | 0.504756  | -1.588675 | 1.463913  |
| H | -0.978931 | -2.176113 | -1.137429 |

**Cartesian coordinates for optimized insertion pathway compounds BMe<sub>3</sub>-NHC 3**

BMe<sub>3</sub>-NHC 3, A

E<sub>c</sub> = -528.026339245 (Hartrees)  
M06-2X/def2-TZVP optimized geometry (Å).

|     |           |           |           |
|-----|-----------|-----------|-----------|
| 0 1 |           |           |           |
| C   | 1.784466  | -0.679079 | -0.001300 |
| C   | 1.817871  | 0.672299  | -0.011691 |
| C   | -0.360828 | 0.047370  | -0.019406 |
| N   | 0.493643  | 1.094092  | -0.026890 |
| N   | 0.445770  | -1.036611 | -0.001385 |
| C   | 0.116772  | 2.499648  | -0.004143 |
| H   | 0.989969  | 3.096217  | -0.251835 |
| H   | -0.663143 | 2.686465  | -0.731705 |
| H   | -0.242919 | 2.782088  | 0.983630  |
| C   | 0.018696  | -2.424712 | -0.008235 |
| H   | -1.016669 | -2.481370 | 0.297236  |
| H   | 0.122863  | -2.847613 | -1.007968 |
| H   | 0.634877  | -2.990287 | 0.688954  |
| C   | -2.459980 | -0.611425 | 1.466057  |
| H   | -3.547378 | -0.739633 | 1.476755  |
| H   | -2.034940 | -1.576864 | 1.758645  |
| H   | -2.221857 | 0.085032  | 2.278073  |
| B   | -2.017961 | -0.003318 | 0.003185  |
| C   | -2.732109 | 1.461218  | -0.149160 |
| H   | -2.492198 | 2.188447  | 0.632629  |
| H   | -2.580545 | 1.944688  | -1.121023 |
| H   | -3.809847 | 1.285852  | -0.071834 |
| C   | -2.527802 | -0.910389 | -1.268476 |
| H   | -3.621601 | -0.870481 | -1.296762 |
| H   | -2.181567 | -0.503144 | -2.225660 |
| H   | -2.267098 | -1.972100 | -1.268049 |
| C   | 2.976842  | 1.604565  | -0.009316 |
| H   | 3.001417  | 2.223641  | -0.908205 |
| H   | 2.959628  | 2.268200  | 0.857120  |
| H   | 3.903019  | 1.035149  | 0.026914  |
| C   | 2.878484  | -1.685526 | 0.010441  |
| H   | 2.892320  | -2.254067 | 0.942675  |
| H   | 2.772598  | -2.396734 | -0.810796 |
| H   | 3.842511  | -1.193083 | -0.095427 |

BMe<sub>3</sub>-NHC 3, T1

E<sub>c</sub> = -527.963377066 (Hartrees)  
M06-2X/def2-TZVP optimized geometry (Å).

|     |           |           |           |
|-----|-----------|-----------|-----------|
| 0 1 |           |           |           |
| C   | 1.672238  | -0.672343 | -0.088442 |
| C   | 1.676767  | 0.666138  | -0.077706 |
| C   | -0.519560 | 0.009613  | -0.125791 |
| N   | 0.361057  | 1.103967  | -0.326210 |
| N   | 0.349065  | -1.106980 | -0.362616 |
| C   | -0.031799 | 2.483465  | -0.277762 |
| H   | 0.814947  | 3.099961  | -0.573035 |
| H   | -0.840330 | 2.665980  | -0.983707 |
| H   | -0.358671 | 2.812171  | 0.717357  |
| C   | -0.047692 | -2.449466 | -0.010212 |
| H   | -0.405532 | -2.527890 | 1.024603  |
| H   | -0.827918 | -2.809118 | -0.674108 |
| H   | 0.808340  | -3.110766 | -0.122485 |
| C   | -0.980452 | -0.000049 | 1.607941  |
| H   | -1.814560 | -0.603886 | 1.965847  |
| H   | -0.054723 | -0.411530 | 2.009507  |
| H   | -1.108752 | 1.024448  | 1.942735  |
| B   | -2.050100 | 0.001553  | -0.206379 |
| C   | -2.952707 | 1.302969  | -0.070095 |
| H   | -2.498126 | 2.198528  | 0.343779  |
| H   | -3.344912 | 1.555913  | -1.062154 |
| H   | -3.830030 | 1.065073  | 0.539063  |
| C   | -2.876752 | -1.327617 | -0.517749 |
| H   | -3.945621 | -1.109926 | -0.559305 |
| H   | -2.592272 | -1.744633 | -1.488153 |
| H   | -2.742533 | -2.123933 | 0.215396  |
| C   | 2.807661  | -1.628763 | -0.021220 |
| H   | 2.729771  | -2.310005 | 0.829831  |
| H   | 2.858504  | -2.238900 | -0.927656 |
| H   | 3.748076  | -1.089523 | 0.070806  |
| C   | 2.810162  | 1.623713  | 0.001555  |
| H   | 2.932986  | 2.173733  | -0.936008 |
| H   | 2.665284  | 2.358329  | 0.797231  |
| H   | 3.738514  | 1.093341  | 0.201022  |

BMe<sub>3</sub>-NHC 3, B

E<sub>c</sub> = -527.997181199 (Hartrees)  
M06-2X/def2-TZVP optimized geometry (Å).

|     |           |           |           |
|-----|-----------|-----------|-----------|
| 0 1 |           |           |           |
| C   | -1.549193 | -0.197273 | 0.071493  |
| C   | -0.683398 | -1.122806 | -0.351988 |
| C   | 0.480010  | 0.932185  | -0.065592 |
| N   | 0.630945  | -0.537126 | -0.498693 |
| N   | -0.942731 | 1.038336  | 0.285811  |
| C   | 1.321360  | -0.883747 | -1.739108 |

|   |           |           |           |
|---|-----------|-----------|-----------|
| H | 2.275746  | -0.370063 | -1.786338 |
| H | 1.513504  | -1.956341 | -1.747735 |
| H | 0.713677  | -0.617650 | -2.607466 |
| C | -1.673442 | 2.251991  | -0.008019 |
| H | -1.816290 | 2.438884  | -1.081002 |
| H | -2.653744 | 2.196211  | 0.462811  |
| H | -1.155774 | 3.105762  | 0.426950  |
| B | 1.406734  | 0.019527  | 0.846351  |
| C | 0.846537  | -0.564847 | 2.222364  |
| H | 1.068665  | -1.631505 | 2.330721  |
| H | 1.344818  | -0.062276 | 3.056247  |
| H | -0.227296 | -0.430353 | 2.363766  |
| C | 3.001817  | 0.086603  | 0.709807  |
| H | 3.449399  | -0.908755 | 0.798325  |
| H | 3.403698  | 0.540354  | -0.198626 |
| H | 3.398017  | 0.672388  | 1.544124  |
| C | 0.956834  | 1.956882  | -1.062060 |
| H | 0.387912  | 1.937519  | -1.996303 |
| H | 0.860961  | 2.952908  | -0.629963 |
| H | 2.010161  | 1.814118  | -1.289577 |
| C | -0.833672 | -2.589011 | -0.545164 |
| H | -1.830444 | -2.913834 | -0.254670 |
| H | -0.679755 | -2.889798 | -1.584579 |
| H | -0.107943 | -3.132377 | 0.067735  |
| C | -2.987503 | -0.382250 | 0.413057  |
| H | -3.178283 | -0.034665 | 1.430995  |
| H | -3.632432 | 0.186143  | -0.259919 |
| H | -3.271865 | -1.429146 | 0.344179  |

BMe<sub>3</sub>-NHC 3, T2

E<sub>c</sub> = -527.988246948 (Hartrees)

M06-2X/def2-TZVP optimized geometry (Å).

0 1

|   |           |           |           |
|---|-----------|-----------|-----------|
| C | 1.491904  | -0.141797 | -0.177488 |
| C | 0.687285  | -1.087490 | 0.340867  |
| C | -0.476037 | 1.099828  | -0.054642 |
| N | -0.643100 | -0.683744 | 0.527075  |
| N | 0.899539  | 1.139855  | -0.220353 |
| C | -1.361303 | -1.186803 | 1.684403  |
| H | -1.723171 | -2.205725 | 1.513701  |
| H | -0.729576 | -1.177224 | 2.575051  |
| H | -2.226763 | -0.555004 | 1.869510  |
| C | 1.694324  | 2.197330  | 0.393466  |
| H | 1.836032  | 2.042413  | 1.469387  |
| H | 2.671442  | 2.221884  | -0.084860 |
| H | 1.221390  | 3.162346  | 0.229330  |
| B | -1.331703 | -0.033557 | -0.765354 |
| C | -0.847521 | -0.637573 | -2.177049 |
| H | -1.014554 | -1.719662 | -2.218647 |
| H | -1.441279 | -0.203083 | -2.986202 |
| H | 0.201816  | -0.461187 | -2.422878 |

|   |           |           |           |
|---|-----------|-----------|-----------|
| C | -2.936470 | 0.064082  | -0.654991 |
| H | -3.311060 | 0.755221  | -1.415824 |
| H | -3.387856 | -0.908533 | -0.876977 |
| H | -3.357836 | 0.394139  | 0.297254  |
| C | -1.081907 | 2.161134  | 0.813744  |
| H | -2.105776 | 1.898862  | 1.063936  |
| H | -0.524204 | 2.352058  | 1.732245  |
| H | -1.125004 | 3.094795  | 0.245426  |
| C | 2.898572  | -0.301884 | -0.656467 |
| H | 3.137629  | -1.350659 | -0.813465 |
| H | 3.026706  | 0.213397  | -1.610619 |
| H | 3.630433  | 0.105940  | 0.044807  |
| C | 1.045773  | -2.507574 | 0.638701  |
| H | 0.450101  | -3.191292 | 0.027871  |
| H | 2.098967  | -2.700586 | 0.452184  |
| H | 0.848280  | -2.748614 | 1.685224  |

BMe<sub>3</sub>-NHC 3, C

E<sub>c</sub> = -528.011862767 (Hartrees)

M06-2X/def2-TZVP optimized geometry (Å).

0 1

|   |           |           |           |
|---|-----------|-----------|-----------|
| C | 1.438490  | 0.313051  | 0.088494  |
| C | 0.544801  | 1.322495  | -0.156640 |
| C | -0.260950 | -1.361629 | -0.086195 |
| N | -0.758622 | 1.055758  | -0.363976 |
| N | 0.998349  | -1.025842 | -0.133863 |
| C | -1.658929 | 2.098390  | -0.808822 |
| H | -1.161717 | 2.829933  | -1.443760 |
| H | -2.464324 | 1.651953  | -1.388520 |
| H | -2.116788 | 2.630312  | 0.035198  |
| C | 2.032109  | -1.989882 | -0.540064 |
| H | 1.655216  | -2.611047 | -1.347497 |
| H | 2.906423  | -1.454819 | -0.892248 |
| H | 2.313654  | -2.625432 | 0.300092  |
| B | -1.349100 | -0.229593 | 0.324551  |
| C | -1.356303 | -0.080193 | 1.952869  |
| H | -2.028635 | 0.727496  | 2.262484  |
| H | -1.717397 | -0.992006 | 2.440534  |
| H | -0.368600 | 0.142546  | 2.370512  |
| C | -2.826335 | -0.587246 | -0.244872 |
| H | -3.224808 | -1.491434 | 0.223409  |
| H | -3.542625 | 0.204041  | -0.005168 |
| H | -2.864276 | -0.740782 | -1.329888 |
| C | -0.643104 | -2.769030 | -0.421171 |
| H | -0.679993 | -2.907653 | -1.507492 |
| H | 0.047898  | -3.508427 | -0.014615 |
| H | -1.639237 | -2.970825 | -0.037666 |
| C | 2.851200  | 0.488102  | 0.570486  |
| H | 3.153340  | -0.358874 | 1.189357  |
| H | 3.597784  | 0.595241  | -0.224331 |
| H | 2.927974  | 1.365175  | 1.209501  |

|   |          |          |           |
|---|----------|----------|-----------|
| C | 1.021871 | 2.748279 | -0.223813 |
| H | 0.970383 | 3.115828 | -1.250279 |
| H | 0.393769 | 3.396642 | 0.389330  |
| H | 2.052266 | 2.846663 | 0.101532  |

BMe<sub>3</sub>-NHC 3, D

E<sub>c</sub> = -528.038916804 (Hartrees)

M06-2X/def2-TZVP optimized geometry (Å).

BMe<sub>3</sub>-NHC 3, T3

E<sub>c</sub> = -527.985281489 (Hartrees)

M06-2X/def2-TZVP optimized geometry (Å).

0 1

|   |           |           |           |
|---|-----------|-----------|-----------|
| C | 1.365552  | -0.667143 | -0.121820 |
| C | 1.364350  | 0.678694  | -0.072696 |
| C | -1.052590 | -0.779330 | -0.293190 |
| N | 0.186115  | 1.424172  | -0.074375 |
| N | 0.131590  | -1.415515 | -0.104372 |
| C | 0.219570  | 2.769745  | 0.463229  |
| H | 0.930562  | 3.412230  | -0.059541 |
| H | -0.763781 | 3.219980  | 0.347081  |
| H | 0.471908  | 2.793430  | 1.532712  |
| C | 0.188814  | -2.696237 | 0.586567  |
| H | -0.772478 | -3.195288 | 0.535823  |
| H | 0.928985  | -3.353335 | 0.134838  |
| H | 0.456034  | -2.552533 | 1.640302  |
| B | -1.126987 | 0.740976  | -0.239387 |
| C | -1.756650 | 0.096032  | 1.401860  |
| H | -1.509438 | 1.055485  | 1.861486  |
| H | -2.834710 | -0.041579 | 1.392493  |
| H | -1.274950 | -0.683610 | 1.990653  |
| C | -2.327148 | 1.598611  | -0.856759 |
| H | -3.182644 | 0.999950  | -1.171198 |
| H | -2.716758 | 2.337721  | -0.151092 |
| H | -1.976832 | 2.151072  | -1.733162 |
| C | -2.242220 | -1.646515 | -0.614747 |
| H | -1.974561 | -2.312703 | -1.437074 |
| H | -2.568569 | -2.261788 | 0.224898  |
| H | -3.085383 | -1.035153 | -0.920982 |
| C | 2.568711  | -1.528657 | -0.383180 |
| H | 2.853528  | -2.137940 | 0.478907  |
| H | 2.359131  | -2.214338 | -1.209610 |
| H | 3.434464  | -0.943024 | -0.670221 |
| C | 2.633269  | 1.485251  | -0.109055 |
| H | 2.649626  | 2.127561  | -0.993382 |
| H | 2.693244  | 2.137157  | 0.763921  |
| H | 3.523666  | 0.868513  | -0.109931 |

0 1

|   |           |           |           |
|---|-----------|-----------|-----------|
| C | 1.271667  | 0.312008  | 0.230200  |
| C | -0.481796 | -1.330326 | -0.172286 |
| C | -1.455848 | -0.421546 | 0.025449  |
| N | -1.154590 | 0.964102  | -0.152437 |
| N | 0.816646  | -0.899313 | -0.497364 |
| C | -2.277123 | 1.800912  | -0.555706 |
| H | -2.770915 | 1.372791  | -1.430858 |
| H | -3.020311 | 1.905855  | 0.236806  |
| H | -1.919954 | 2.789064  | -0.823859 |
| C | 1.826945  | -1.904108 | -0.766720 |
| H | 2.281752  | -2.327649 | 0.140271  |
| H | 1.402982  | -2.720396 | -1.344259 |
| H | 2.622445  | -1.472803 | -1.370508 |
| B | 0.162622  | 1.433280  | -0.041450 |
| C | 0.568589  | 2.957969  | -0.137258 |
| H | 1.120437  | 3.151816  | -1.062503 |
| H | -0.253817 | 3.669095  | -0.087771 |
| H | 1.258060  | 3.206938  | 0.674549  |
| C | 1.398425  | 0.040149  | 1.739859  |
| H | 2.154940  | -0.723613 | 1.942511  |
| H | 1.698573  | 0.949488  | 2.265843  |
| H | 0.446672  | -0.295734 | 2.156271  |
| C | 2.628598  | 0.768687  | -0.305192 |
| H | 2.605428  | 0.895333  | -1.390148 |
| H | 2.895916  | 1.726196  | 0.140347  |
| H | 3.425380  | 0.065070  | -0.055087 |
| C | -0.705272 | -2.812611 | -0.062599 |
| H | -0.619567 | -3.297247 | -1.037546 |
| H | 0.034379  | -3.273802 | 0.595562  |
| H | -1.690367 | -3.048176 | 0.322056  |
| C | -2.849582 | -0.716927 | 0.500198  |
| H | -3.089150 | -0.102537 | 1.372596  |
| H | -3.605433 | -0.502205 | -0.259372 |
| H | -2.972573 | -1.752646 | 0.795294  |



**Cartesian coordinates for optimized insertion pathway compounds BMe<sub>3</sub>-NHC 4**

BMe<sub>3</sub>-NHC 4, A

E<sub>c</sub> = -1368.59251802 (Hartrees)

M06-2X/def2-TZVP optimized geometry (Å).

0 1

|    |           |           |           |
|----|-----------|-----------|-----------|
| C  | 1.330382  | -0.669532 | -0.013622 |
| C  | 1.363316  | 0.677275  | -0.011296 |
| C  | -0.799821 | 0.054485  | -0.052268 |
| N  | 0.051648  | 1.108414  | -0.048767 |
| N  | 0.003901  | -1.037176 | -0.047088 |
| C  | -0.304413 | 2.521290  | -0.095340 |
| H  | 0.486590  | 3.055891  | -0.614281 |
| H  | -1.235795 | 2.629770  | -0.632218 |
| H  | -0.412401 | 2.919105  | 0.912243  |
| C  | -0.410741 | -2.432317 | -0.081562 |
| H  | -1.473125 | -2.470695 | -0.271099 |
| H  | 0.129196  | -2.940564 | -0.878484 |
| H  | -0.184947 | -2.907582 | 0.872182  |
| C  | -2.838461 | -0.848578 | 1.374444  |
| H  | -3.927495 | -0.950993 | 1.416094  |
| H  | -2.434814 | -1.859459 | 1.474387  |
| H  | -2.545517 | -0.305951 | 2.280252  |
| B  | -2.461165 | -0.001257 | 0.016872  |
| C  | -3.164497 | 1.466893  | 0.174321  |
| H  | -2.793384 | 2.076637  | 1.004888  |
| H  | -3.158895 | 2.084403  | -0.730342 |
| H  | -4.220242 | 1.277467  | 0.391350  |
| C  | -3.020062 | -0.675029 | -1.369690 |
| H  | -4.113822 | -0.686220 | -1.322321 |
| H  | -2.755961 | -0.075159 | -2.247620 |
| H  | -2.717858 | -1.701882 | -1.595585 |
| Cl | 2.706173  | 1.705595  | 0.034437  |
| Cl | 2.608018  | -1.776424 | 0.023049  |

BMe<sub>3</sub>-NHC 4, T1

E<sub>c</sub> = -1368.53731183 (Hartrees)

M06-2X/def2-TZVP optimized geometry (Å).

0 1

|   |           |           |           |
|---|-----------|-----------|-----------|
| C | 1.230892  | -0.671392 | -0.088933 |
| C | 1.235048  | 0.662266  | -0.073994 |
| C | -0.938870 | 0.009168  | -0.147150 |
| N | -0.063407 | 1.110828  | -0.336917 |
| N | -0.074956 | -1.114884 | -0.379858 |
| C | -0.449733 | 2.496101  | -0.330669 |
| H | 0.403675  | 3.093178  | -0.643140 |
| H | -1.256758 | 2.648535  | -1.043667 |
| H | -0.773440 | 2.848283  | 0.654950  |

|    |           |           |           |
|----|-----------|-----------|-----------|
| C  | -0.477464 | -2.462701 | -0.044060 |
| H  | -0.876506 | -2.534884 | 0.973806  |
| H  | -1.227736 | -2.816159 | -0.744141 |
| H  | 0.390894  | -3.111705 | -0.120048 |
| C  | -1.420243 | 0.000626  | 1.602268  |
| H  | -2.295452 | -0.539309 | 1.964205  |
| H  | -0.529997 | -0.481463 | 2.003684  |
| H  | -1.470019 | 1.032483  | 1.934743  |
| B  | -2.467897 | 0.000719  | -0.178347 |
| C  | -3.359190 | 1.312244  | -0.060869 |
| H  | -2.897243 | 2.209097  | 0.341747  |
| H  | -3.751553 | 1.556655  | -1.054619 |
| H  | -4.235575 | 1.089175  | 0.554513  |
| C  | -3.302286 | -1.327930 | -0.474481 |
| H  | -4.371871 | -1.111121 | -0.458726 |
| H  | -3.068860 | -1.717249 | -1.469814 |
| H  | -3.133118 | -2.143958 | 0.228002  |
| Cl | 2.566920  | 1.708670  | 0.035985  |
| Cl | 2.567942  | -1.714967 | -0.006867 |

BMe<sub>3</sub>-NHC 4, B

E<sub>c</sub> = -1368.57236303 (Hartrees)

M06-2X/def2-TZVP optimized geometry (Å).

0 1

|    |           |           |           |
|----|-----------|-----------|-----------|
| C  | -1.183948 | 0.358564  | 0.031588  |
| C  | -0.558029 | -0.753882 | -0.349059 |
| C  | 1.032077  | 0.950493  | -0.044253 |
| N  | 0.845320  | -0.537378 | -0.476189 |
| N  | -0.339061 | 1.442342  | 0.198989  |
| C  | 1.462564  | -1.061605 | -1.694576 |
| H  | 2.531002  | -0.874250 | -1.664936 |
| H  | 1.297815  | -2.137407 | -1.730376 |
| H  | 1.024263  | -0.597778 | -2.580523 |
| C  | -0.771075 | 2.716277  | -0.358964 |
| H  | -0.814567 | 2.719650  | -1.454007 |
| H  | -1.763247 | 2.937235  | 0.028470  |
| H  | -0.099685 | 3.502939  | -0.023310 |
| B  | 1.647776  | -0.137019 | 0.932736  |
| C  | 0.874938  | -0.560786 | 2.261672  |
| H  | 0.745372  | -1.645744 | 2.321849  |
| H  | 1.474676  | -0.274057 | 3.129535  |
| H  | -0.106838 | -0.101207 | 2.389273  |
| C  | 3.213646  | -0.455646 | 0.894474  |
| H  | 3.396951  | -1.518005 | 1.081257  |
| H  | 3.759072  | -0.188883 | -0.012670 |
| H  | 3.697703  | 0.084938  | 1.712806  |
| C  | 1.832903  | 1.794939  | -0.997564 |
| H  | 1.346487  | 1.935596  | -1.965761 |
| H  | 1.994254  | 2.776342  | -0.551642 |
| H  | 2.814241  | 1.357285  | -1.158762 |
| Cl | -2.839497 | 0.472567  | 0.424957  |
| Cl | -1.189835 | -2.328827 | -0.466392 |

BMe<sub>3</sub>-NHC 4, T2E<sub>c</sub> = -1368.56679320 (Hartrees)

M06-2X/def2-TZVP optimized geometry (Å).

0 1

|    |           |           |           |
|----|-----------|-----------|-----------|
| C  | 1.116026  | 0.412771  | -0.088165 |
| C  | 0.566970  | -0.744959 | 0.305385  |
| C  | -1.085952 | 1.053363  | -0.001250 |
| N  | -0.815641 | -0.721648 | 0.442552  |
| N  | 0.240086  | 1.500661  | -0.079092 |
| C  | -1.419782 | -1.449086 | 1.549746  |
| H  | -1.628906 | -2.481173 | 1.260902  |
| H  | -0.763820 | -1.442455 | 2.420405  |
| H  | -2.360368 | -0.969764 | 1.812334  |
| C  | 0.693578  | 2.646416  | 0.708417  |
| H  | 0.759451  | 2.414482  | 1.776397  |
| H  | 1.679003  | 2.935128  | 0.351455  |
| H  | 0.017047  | 3.483331  | 0.557123  |
| B  | -1.589405 | -0.178459 | -0.870941 |
| C  | -0.878229 | -0.526986 | -2.265669 |
| H  | -0.731192 | -1.607286 | -2.367878 |
| H  | -1.528906 | -0.224326 | -3.090448 |
| H  | 0.089379  | -0.050277 | -2.435948 |
| C  | -3.161106 | -0.512200 | -0.849982 |
| H  | -3.331590 | -1.522101 | -1.234779 |
| H  | -3.675503 | -0.451332 | 0.111566  |
| H  | -3.685739 | 0.165815  | -1.529738 |
| C  | -1.983459 | 1.821141  | 0.919434  |
| H  | -1.546721 | 2.013645  | 1.900687  |
| H  | -2.203716 | 2.785464  | 0.453468  |
| H  | -2.931591 | 1.305404  | 1.037878  |
| Cl | 1.417241  | -2.217237 | 0.511621  |
| Cl | 2.743395  | 0.622055  | -0.563411 |

BMe<sub>3</sub>-NHC 4, CE<sub>c</sub> = -1368.59568052 (Hartrees)

M06-2X/def2-TZVP optimized geometry (Å).

0 1

|   |           |           |           |
|---|-----------|-----------|-----------|
| C | -0.941481 | 0.607900  | -0.042709 |
| C | -0.797597 | -0.739223 | -0.190872 |
| C | 1.395077  | 0.979640  | -0.111695 |
| N | 0.392816  | -1.311560 | -0.318935 |
| N | 0.184147  | 1.444906  | -0.256964 |
| C | 0.525571  | -2.651075 | -0.861375 |
| H | -0.242140 | -2.854640 | -1.605667 |
| H | 1.499725  | -2.741830 | -1.334793 |
| H | 0.454355  | -3.408063 | -0.073876 |
| C | -0.098159 | 2.804350  | -0.746924 |
| H | 0.691379  | 3.115053  | -1.422495 |
| H | -1.043933 | 2.796972  | -1.277563 |

|    |           |           |           |
|----|-----------|-----------|-----------|
| H  | -0.165107 | 3.496970  | 0.091310  |
| B  | 1.592493  | -0.556497 | 0.396603  |
| C  | 1.417723  | -0.579404 | 2.015114  |
| H  | 1.495326  | -1.606079 | 2.387114  |
| H  | 2.204420  | -0.003607 | 2.513395  |
| H  | 0.457355  | -0.181615 | 2.358171  |
| C  | 3.018693  | -1.162060 | -0.071224 |
| H  | 3.843478  | -0.658872 | 0.440110  |
| H  | 3.103108  | -2.216654 | 0.205416  |
| H  | 3.213291  | -1.092237 | -1.147418 |
| C  | 2.547576  | 1.878368  | -0.425294 |
| H  | 2.692526  | 1.950040  | -1.508637 |
| H  | 2.409733  | 2.888262  | -0.037887 |
| H  | 3.456049  | 1.458505  | -0.003793 |
| Cl | -2.231209 | -1.724081 | -0.188592 |
| Cl | -2.384979 | 1.375604  | 0.487108  |

BMe<sub>3</sub>-NHC 4, T3E<sub>c</sub> = -1368.57157497 (Hartrees)

M06-2X/def2-TZVP optimized geometry (Å).

0 1

|    |           |           |           |
|----|-----------|-----------|-----------|
| C  | 0.927028  | -0.677359 | 0.066988  |
| C  | 0.964044  | 0.662380  | 0.055931  |
| C  | -1.434839 | -0.729682 | -0.292332 |
| N  | -0.162610 | 1.438977  | 0.064205  |
| N  | -0.305950 | -1.374208 | 0.112088  |
| C  | -0.133140 | 2.707759  | 0.769373  |
| H  | 0.659345  | 3.353816  | 0.392365  |
| H  | -1.083160 | 3.215096  | 0.613306  |
| H  | 0.016941  | 2.578072  | 1.847930  |
| C  | -0.376410 | -2.658605 | 0.800115  |
| H  | -1.138839 | -2.628147 | 1.581776  |
| H  | -0.612641 | -3.467394 | 0.106959  |
| H  | 0.582250  | -2.870231 | 1.262648  |
| B  | -1.473566 | 0.792696  | -0.304598 |
| C  | -2.337229 | 0.242176  | 1.229110  |
| H  | -2.168277 | 1.230021  | 1.663929  |
| H  | -3.401666 | 0.090881  | 1.075845  |
| H  | -1.939771 | -0.488015 | 1.931350  |
| C  | -2.513994 | 1.657683  | -1.144551 |
| H  | -3.418713 | 1.111504  | -1.415708 |
| H  | -2.840672 | 2.550608  | -0.605166 |
| H  | -2.046724 | 2.000720  | -2.070992 |
| C  | -2.565005 | -1.617898 | -0.726804 |
| H  | -2.213437 | -2.230308 | -1.560218 |
| H  | -2.898098 | -2.293351 | 0.063667  |
| H  | -3.415193 | -1.029937 | -1.059675 |
| Cl | 2.299455  | -1.658295 | -0.316986 |
| Cl | 2.487820  | 1.478358  | -0.158665 |

BMe<sub>3</sub>-NHC 4, DE<sub>c</sub> = -1368.62491623 (Hartrees)

M06-2X/def2-TZVP optimized geometry (Å).

|     |           |           |           |
|-----|-----------|-----------|-----------|
| 0 1 |           |           |           |
| C   | 1.555842  | -0.475797 | 0.281760  |
| C   | -0.766656 | -0.701477 | -0.282184 |
| C   | -0.999686 | 0.610218  | -0.134196 |
| N   | 0.057399  | 1.530051  | -0.256896 |
| N   | 0.513345  | -1.159719 | -0.534998 |
| C   | -0.303215 | 2.873938  | -0.702005 |
| H   | -0.990758 | 2.812839  | -1.545905 |
| H   | -0.786595 | 3.441875  | 0.093550  |
| H   | 0.591694  | 3.396951  | -1.022067 |
| C   | 0.701217  | -2.551405 | -0.899366 |
| H   | 0.721860  | -3.221350 | -0.031079 |
| H   | -0.106942 | -2.866975 | -1.553400 |
| H   | 1.633185  | -2.660419 | -1.448644 |
| B   | 1.377849  | 1.093005  | -0.014529 |
| C   | 2.620103  | 2.061522  | -0.026775 |
| H   | 3.241817  | 1.874282  | -0.908154 |
| H   | 2.383220  | 3.123432  | -0.004344 |
| H   | 3.258820  | 1.850935  | 0.835460  |
| C   | 1.371050  | -0.780805 | 1.776112  |
| H   | 1.474854  | -1.851700 | 1.971187  |
| H   | 2.127104  | -0.258453 | 2.366377  |
| H   | 0.387205  | -0.461671 | 2.125975  |
| C   | 2.939650  | -0.943092 | -0.162807 |
| H   | 3.083177  | -0.803603 | -1.236587 |
| H   | 3.704263  | -0.366594 | 0.356472  |
| H   | 3.107523  | -1.994884 | 0.076383  |
| Cl  | -2.031248 | -1.856266 | -0.010137 |
| Cl  | -2.523146 | 1.230935  | 0.388810  |

Cartesian coordinates for optimized insertion pathway compounds BMe<sub>3</sub>-NHC 5BMe<sub>3</sub>-NHC 5, AE<sub>c</sub> = -603.042940512 (Hartrees)

M06-2X/def2-TZVP optimized geometry (Å).

|     |           |           |           |
|-----|-----------|-----------|-----------|
| 0 1 |           |           |           |
| C   | 1.346297  | -0.677974 | -0.016053 |
| C   | 1.368924  | 0.711360  | -0.010869 |
| C   | -0.791409 | 0.049074  | -0.043139 |
| N   | 0.043539  | 1.116731  | -0.042819 |
| N   | 0.013880  | -1.042646 | -0.042934 |
| C   | -0.318345 | 2.523367  | -0.084158 |
| H   | 0.469334  | 3.057902  | -0.611655 |
| H   | -1.251214 | 2.644987  | -0.616185 |
| H   | -0.418688 | 2.926536  | 0.923048  |
| C   | -0.381308 | -2.438264 | -0.071800 |
| H   | -1.448217 | -2.509282 | -0.223206 |
| H   | 0.138152  | -2.934260 | -0.892234 |
| H   | -0.111995 | -2.917225 | 0.870331  |
| C   | -2.822394 | -0.857585 | 1.382310  |
| H   | -3.909758 | -0.980200 | 1.410889  |
| H   | -2.398440 | -1.858099 | 1.499810  |
| H   | -2.551222 | -0.297685 | 2.284244  |
| B   | -2.443552 | -0.017659 | 0.018516  |
| C   | -3.171646 | 1.440853  | 0.154582  |
| H   | -2.819062 | 2.063353  | 0.983824  |
| H   | -3.162853 | 2.050505  | -0.755425 |
| H   | -4.227420 | 1.238622  | 0.360304  |
| C   | -2.985703 | -0.713331 | -1.366176 |
| H   | -4.079094 | -0.746845 | -1.320589 |
| H   | -2.731839 | -0.112089 | -2.246145 |
| H   | -2.659406 | -1.733871 | -1.585554 |
| C   | 2.564477  | 1.415408  | 0.020527  |
| C   | 2.512642  | -1.429264 | 0.004219  |
| C   | 3.732266  | 0.669430  | 0.041829  |
| C   | 3.707547  | -0.728867 | 0.032896  |
| H   | 2.591992  | 2.496095  | 0.037155  |
| H   | 4.684926  | 1.180874  | 0.069576  |
| H   | 4.641330  | -1.274313 | 0.051952  |
| H   | 2.491217  | -2.510546 | 0.002548  |

BMe<sub>3</sub>-NHC 5, T1E<sub>c</sub> = -602.996315416 (Hartrees)

M06-2X/def2-TZVP optimized geometry (Å).

0 1

|   |           |           |           |
|---|-----------|-----------|-----------|
| C | 1.242956  | -0.701679 | -0.171261 |
| C | 1.244573  | 0.700909  | -0.144291 |
| C | -0.934869 | 0.003684  | -0.135131 |
| N | -0.064352 | 1.110155  | -0.331206 |
| N | -0.069319 | -1.107428 | -0.402238 |
| C | -0.438478 | 2.489537  | -0.455836 |
| H | 0.392095  | 3.024885  | -0.916144 |
| H | -1.305623 | 2.584362  | -1.105364 |
| H | -0.661985 | 2.965123  | 0.506674  |
| C | -0.448925 | -2.484593 | -0.232290 |
| H | -0.718904 | -2.722327 | 0.804784  |
| H | -1.281436 | -2.737322 | -0.881417 |
| H | 0.396727  | -3.107953 | -0.515806 |
| C | -1.372655 | -0.025677 | 1.610281  |
| H | -1.299222 | 0.998450  | 1.962824  |
| H | -2.296799 | -0.470095 | 1.984024  |
| H | -0.539158 | -0.619851 | 1.981017  |
| B | -2.462930 | 0.004392  | -0.113845 |
| C | -3.323256 | 1.336173  | 0.025904  |
| H | -3.719991 | 1.608315  | -0.958724 |
| H | -4.196151 | 1.135719  | 0.653187  |
| H | -2.823899 | 2.212392  | 0.431507  |
| C | -3.329201 | -1.316473 | -0.342676 |
| H | -3.039784 | -2.172019 | 0.266570  |
| H | -4.383434 | -1.119012 | -0.139355 |
| H | -3.263143 | -1.637502 | -1.386941 |
| C | 2.413719  | 1.413985  | 0.009241  |
| C | 2.414072  | -1.412768 | -0.023906 |
| C | 3.605330  | -0.691245 | 0.130756  |
| C | 3.605905  | 0.691091  | 0.143113  |
| H | 2.415710  | 2.495316  | 0.039516  |
| H | 4.537249  | 1.226245  | 0.271240  |
| H | 4.536040  | -1.229377 | 0.250322  |
| H | 2.427034  | -2.494056 | -0.028006 |

BMe<sub>3</sub>-NHC 5, BE<sub>c</sub> = -603.028168074 (Hartrees)

M06-2X/def2-TZVP optimized geometry (Å).

0 1

|   |           |           |           |
|---|-----------|-----------|-----------|
| C | -1.095187 | 0.663407  | -0.229978 |
| C | -0.775449 | -0.694595 | -0.210596 |
| C | 1.222829  | 0.560939  | -0.442134 |
| N | 0.645436  | -0.846897 | -0.329050 |
| N | 0.034364  | 1.421949  | -0.470672 |
| C | 1.095953  | -1.911648 | -1.220537 |

|   |           |           |           |
|---|-----------|-----------|-----------|
| H | 2.179257  | -1.906329 | -1.279940 |
| H | 0.780744  | -2.870009 | -0.810075 |
| H | 0.665987  | -1.786477 | -2.216035 |
| C | 0.169857  | 2.732491  | 0.124476  |
| H | 1.036163  | 3.235775  | -0.303355 |
| H | -0.708654 | 3.332975  | -0.107429 |
| H | 0.295862  | 2.679731  | 1.212741  |
| B | 1.607326  | -0.213356 | 0.890959  |
| C | 0.836615  | 0.062127  | 2.260214  |
| H | 0.693575  | -0.867775 | 2.819465  |
| H | 1.449036  | 0.710953  | 2.893355  |
| H | -0.142713 | 0.534413  | 2.166599  |
| C | 3.024044  | -0.943838 | 1.018805  |
| H | 2.915098  | -1.956976 | 1.419135  |
| H | 3.621001  | -1.015034 | 0.107370  |
| H | 3.632889  | -0.395814 | 1.743123  |
| C | 2.114990  | 0.823805  | -1.625823 |
| H | 1.586673  | 0.669013  | -2.569998 |
| H | 2.427984  | 1.868481  | -1.590620 |
| H | 3.019037  | 0.218588  | -1.608204 |
| C | -2.408845 | 1.059847  | -0.036547 |
| C | -1.725918 | -1.672594 | -0.061317 |
| C | -3.056641 | -1.274773 | 0.104425  |
| C | -3.380838 | 0.071103  | 0.124888  |
| H | -2.681166 | 2.106425  | -0.021703 |
| H | -4.411580 | 0.368444  | 0.268698  |
| H | -3.827324 | -2.022049 | 0.232539  |
| H | -1.455550 | -2.720547 | -0.047672 |

BMe<sub>3</sub>-NHC 5, T2E<sub>c</sub> = -603.015278235 (Hartrees)

M06-2X/def2-TZVP optimized geometry (Å).

0 1

|   |           |           |           |
|---|-----------|-----------|-----------|
| C | -1.038593 | 0.610649  | 0.229121  |
| C | -0.714299 | -0.634903 | -0.330308 |
| C | 1.265831  | 0.858281  | 0.050364  |
| N | 0.649814  | -0.817278 | -0.534649 |
| N | 0.048983  | 1.502790  | 0.241231  |
| C | 1.086850  | -1.623819 | -1.658535 |
| H | 0.370664  | -1.550510 | -2.478775 |
| H | 2.054173  | -1.266951 | -2.009301 |
| H | 1.201745  | -2.672631 | -1.370126 |
| C | -0.213155 | 2.799205  | -0.376766 |
| H | 0.631928  | 3.464163  | -0.216220 |
| H | -0.412799 | 2.712881  | -1.450073 |
| H | -1.082780 | 3.243208  | 0.100586  |
| C | 0.874000  | -0.875383 | 2.175858  |
| H | 1.587910  | -0.689459 | 2.983350  |
| H | -0.031904 | -0.316427 | 2.417572  |
| H | 0.619311  | -1.939380 | 2.225962  |
| C | 3.047245  | -1.129991 | 0.631698  |

|   |           |           |           |
|---|-----------|-----------|-----------|
| H | 3.049789  | -2.189396 | 0.906641  |
| H | 3.529109  | -1.057922 | -0.346061 |
| H | 3.708571  | -0.629273 | 1.345159  |
| B | 1.560467  | -0.526343 | 0.766517  |
| C | -2.349081 | 0.911171  | 0.566815  |
| C | -1.721426 | -1.546921 | -0.617563 |
| C | -3.344153 | -0.021891 | 0.310730  |
| C | -3.033840 | -1.236900 | -0.289027 |
| H | -2.593891 | 1.863373  | 1.018700  |
| H | -4.368555 | 0.204407  | 0.574862  |
| H | -3.817106 | -1.957373 | -0.484212 |
| H | -1.475886 | -2.503344 | -1.061616 |
| C | 2.261172  | 1.546449  | -0.831182 |
| H | 1.827448  | 1.981130  | -1.732761 |
| H | 2.736840  | 2.349609  | -0.261009 |
| H | 3.048209  | 0.851339  | -1.108568 |

BMe<sub>3</sub>-NHC 5, C

E<sub>c</sub> = -603.042099419 (Hartrees)

M06-2X/def2-TZVP optimized geometry (Å).

|     |           |           |           |
|-----|-----------|-----------|-----------|
| 0 1 |           |           |           |
| C   | -0.988333 | 0.673610  | -0.042182 |
| C   | -0.886924 | -0.733924 | -0.187354 |
| C   | 1.383536  | 0.947458  | -0.024516 |
| N   | 0.316948  | -1.315419 | -0.388014 |
| N   | 0.200007  | 1.471280  | -0.173199 |
| C   | 0.328124  | -2.744614 | -0.607014 |
| H   | -0.336130 | -3.023131 | -1.429481 |
| H   | 1.334115  | -3.056549 | -0.870621 |
| H   | 0.017388  | -3.307451 | 0.283628  |
| C   | -0.001832 | 2.893226  | -0.480743 |
| H   | 0.880851  | 3.291210  | -0.966265 |
| H   | -0.844101 | 2.982213  | -1.160249 |
| H   | -0.208341 | 3.459993  | 0.427547  |
| B   | 1.598121  | -0.639353 | 0.195573  |
| C   | 1.742435  | -0.879284 | 1.811030  |
| H   | 1.878159  | -1.947587 | 2.008174  |
| H   | 2.609678  | -0.371546 | 2.245717  |
| H   | 0.857922  | -0.557812 | 2.370940  |
| C   | 2.933451  | -1.124289 | -0.605330 |
| H   | 3.822965  | -0.544650 | -0.346774 |
| H   | 3.184470  | -2.157797 | -0.352561 |
| H   | 2.816843  | -1.075944 | -1.693404 |
| C   | 2.577762  | 1.845217  | -0.021947 |
| H   | 2.948385  | 1.964484  | -1.045377 |
| H   | 2.391280  | 2.830199  | 0.401964  |
| H   | 3.368761  | 1.360437  | 0.544328  |
| C   | -2.204620 | 1.291481  | 0.205349  |
| C   | -2.105025 | -1.447571 | -0.131398 |
| C   | -3.311443 | -0.815916 | 0.098120  |
| C   | -3.377104 | 0.557493  | 0.285793  |

|   |           |           |           |
|---|-----------|-----------|-----------|
| H | -2.250318 | 2.361275  | 0.351661  |
| H | -4.316249 | 1.052348  | 0.486743  |
| H | -4.215107 | -1.411093 | 0.143657  |
| H | -2.090034 | -2.520182 | -0.247863 |

BMe<sub>3</sub>-NHC 5, T3

E<sub>c</sub> = -603.024247403 (Hartrees)

M06-2X/def2-TZVP optimized geometry (Å).

|     |           |           |           |
|-----|-----------|-----------|-----------|
| 0 1 |           |           |           |
| C   | 0.979781  | -0.685374 | -0.046371 |
| C   | 0.976897  | 0.730799  | 0.010333  |
| C   | -1.424138 | -0.770266 | -0.256431 |
| N   | -0.214770 | 1.419452  | 0.101734  |
| N   | -0.250509 | -1.399369 | 0.010653  |
| C   | -0.145075 | 2.849103  | 0.296505  |
| H   | 0.286008  | 3.369685  | -0.567693 |
| H   | -1.146099 | 3.241739  | 0.455765  |
| H   | 0.460501  | 3.101117  | 1.172895  |
| C   | -0.193797 | -2.803153 | 0.381616  |
| H   | -1.164405 | -3.132616 | 0.737724  |
| H   | 0.102139  | -3.437699 | -0.458568 |
| H   | 0.528657  | -2.937236 | 1.186806  |
| B   | -1.516373 | 0.744076  | -0.165548 |
| C   | -2.268625 | 0.065917  | 1.401830  |
| H   | -2.062984 | 1.017103  | 1.896764  |
| H   | -3.341592 | -0.081295 | 1.306003  |
| H   | -1.819557 | -0.724036 | 2.001184  |
| C   | -2.667123 | 1.608314  | -0.858782 |
| H   | -3.515802 | 1.017147  | -1.203725 |
| H   | -3.076319 | 2.363777  | -0.182361 |
| H   | -2.268877 | 2.142867  | -1.725720 |
| C   | -2.567905 | -1.641800 | -0.695341 |
| H   | -2.235292 | -2.261292 | -1.531019 |
| H   | -2.926746 | -2.309265 | 0.089755  |
| H   | -3.406051 | -1.034859 | -1.022919 |
| C   | 2.174553  | -1.374891 | -0.156758 |
| C   | 2.216624  | 1.375219  | -0.024434 |
| C   | 3.410328  | 0.666816  | -0.116556 |
| C   | 3.398481  | -0.709257 | -0.188376 |
| H   | 2.166668  | -2.453470 | -0.222751 |
| H   | 4.317489  | -1.273630 | -0.264636 |
| H   | 4.346795  | 1.209347  | -0.132519 |
| H   | 2.254283  | 2.453082  | 0.022646  |

BMe<sub>3</sub>-NHC 5, DE<sub>c</sub> = -603.077783480 (Hartrees)

M06-2X/def2-TZVP optimized geometry (Å).

0 1

|   |           |           |           |
|---|-----------|-----------|-----------|
| C | 1.531893  | -0.624641 | 0.178596  |
| C | -0.873398 | -0.674539 | -0.208396 |
| C | -0.985796 | 0.730013  | -0.083653 |
| N | 0.178024  | 1.521707  | -0.213861 |
| N | 0.367607  | -1.236107 | -0.503975 |
| C | -0.030924 | 2.942753  | -0.449404 |
| H | -0.786188 | 3.084136  | -1.223600 |
| H | -0.361772 | 3.463195  | 0.453508  |
| H | 0.894337  | 3.393981  | -0.791358 |
| C | 0.383947  | -2.672494 | -0.687514 |
| H | 0.181335  | -3.233774 | 0.235719  |
| H | -0.368866 | -2.950006 | -1.424724 |
| H | 1.347485  | -2.984228 | -1.077526 |
| B | 1.453182  | 0.958468  | -0.020053 |
| C | 2.762848  | 1.837128  | 0.057553  |
| H | 3.298977  | 1.803915  | -0.897092 |
| H | 2.596217  | 2.884463  | 0.303902  |
| H | 3.453432  | 1.433561  | 0.801313  |
| C | 1.516709  | -0.941730 | 1.686165  |
| H | 1.607851  | -2.017622 | 1.858548  |
| H | 2.352736  | -0.454201 | 2.192630  |
| H | 0.589141  | -0.597573 | 2.149390  |
| C | 2.831322  | -1.155995 | -0.431918 |
| H | 2.812275  | -1.077091 | -1.521173 |
| H | 3.681333  | -0.583729 | -0.063864 |
| H | 3.013639  | -2.197540 | -0.161921 |
| C | -2.033564 | -1.437975 | -0.069001 |
| C | -2.228130 | 1.301068  | 0.152902  |
| C | -3.374254 | 0.522134  | 0.272424  |
| C | -3.271534 | -0.848731 | 0.160075  |
| H | -2.314362 | 2.373558  | 0.250733  |
| H | -4.329699 | 0.995401  | 0.453955  |
| H | -4.148223 | -1.476137 | 0.255072  |
| H | -1.979702 | -2.513795 | -0.135363 |

**Table S1.** Activation barriers for T1 (hydride migration), NBO partial charges on carbenic carbon of adduct A, and <sup>31</sup>P chemical shifts of NHC-PPh adducts for NHC compounds 1-5.

| Insertion compound               | NHC compound | Activation barrier <sup>a</sup> / kJ mol <sup>-1</sup> | Partial charge <sup>b</sup> / e | <sup>31</sup> P NMR chemical shift of NHC-PPh adduct <sup>c</sup> / ppm |
|----------------------------------|--------------|--------------------------------------------------------|---------------------------------|-------------------------------------------------------------------------|
| Ph <sub>2</sub> SiH <sub>2</sub> | 1            | 61.5                                                   | 0.165                           | -61.2                                                                   |
|                                  | 2            | 28.2                                                   | 0.266                           | -10.4                                                                   |
|                                  | 3            | 71.4                                                   | 0.167                           | -53.5                                                                   |
|                                  | 4            | 58.8                                                   | 0.185                           | -                                                                       |
|                                  | 5            | 50.6                                                   | 0.220                           | -34.6                                                                   |
| H <sub>2</sub> BMe               | 1            | 145.2                                                  | 0.366                           | -61.2                                                                   |
|                                  | 2            | 90.0                                                   | 0.452                           | -10.4                                                                   |
|                                  | 3            | 156.1                                                  | 0.370                           | -53.5                                                                   |
|                                  | 4            | 129.0                                                  | 0.383                           | -                                                                       |
|                                  | 5            | 116.9                                                  | 0.419                           | -34.6                                                                   |
| HBMe <sub>2</sub>                | 1            | 133.8                                                  | 0.364                           | -61.2                                                                   |
|                                  | 2            | 73.5                                                   | 0.456                           | -10.4                                                                   |
|                                  | 3            | 149.7                                                  | 0.371                           | -53.5                                                                   |
|                                  | 4            | 132.5                                                  | 0.383                           | -                                                                       |
|                                  | 5            | 105.4                                                  | 0.419                           | -34.6                                                                   |
| BMe <sub>3</sub>                 | 1            | 167.8                                                  | 0.366                           | -61.2                                                                   |
|                                  | 2            | 113.6                                                  | 0.458                           | -10.4                                                                   |
|                                  | 3            | 173.3                                                  | 0.368                           | -53.5                                                                   |
|                                  | 4            | 152.8                                                  | 0.381                           | -                                                                       |
|                                  | 5            | 125.2                                                  | 0.418                           | -34.6                                                                   |

<sup>a</sup> Difference between adduct A and transition state T1. SCS-MP2/def2-TZVP//M06-2X/def2-TZVP calculated  $\Delta G$  values. Units of kJ/mol.

<sup>b</sup> Charge on carbenic carbon (adduct A). B3LYP/def2-TZVP//M06-2X/def2-TZVP values.

<sup>c</sup> Values reproduced from O. Back, M. Henry-Ellinger, C. D. Martin, D. Martin, G. Bertrand, *Angew. Chem. Int. Ed.* **2013**, 52, 2939-2943.

**Table S2.** Correlation ( $r^2$ ) between calculated NBO charges and T1 barrier height;  $\Delta E_e$  refers to electronic energies (T1 barrier height),  $\Delta G$  refers to Gibb's free energies (M06-2X/def2-TZVP thermochemical corrections employed for all  $\Delta G$  results).

|                 | Ph <sub>2</sub> SiH <sub>2</sub> |            | BH <sub>2</sub> Me |            | BHMe <sub>2</sub> |            | BMe <sub>3</sub> |            |
|-----------------|----------------------------------|------------|--------------------|------------|-------------------|------------|------------------|------------|
|                 | $\Delta E_e$                     | $\Delta G$ | $\Delta E_e$       | $\Delta G$ | $\Delta E_e$      | $\Delta G$ | $\Delta E_e$     | $\Delta G$ |
| B3LYP/SVP       | 0.923                            | 0.859      | 0.946              | 0.858      | 0.956             | 0.848      | 0.833            | 0.741      |
| B3LYP/TZVP      | 0.989                            | 0.917      | 0.958              | 0.911      | 0.505             | 0.533      | 0.944            | 0.914      |
| M06-2X/SVP      | 0.972                            | 0.908      | 0.951              | 0.895      | 0.977             | 0.906      | 0.926            | 0.873      |
| M06-2X/TZVP     | 0.985                            | 0.907      | 0.953              | 0.895      | 0.973             | 0.940      | 0.937            | 0.902      |
| BP86/SVP        | 0.928                            | 0.852      | 0.950              | 0.896      | 0.849             | 0.712      | 0.840            | 0.772      |
| BP86/TZVP       | 0.959                            | 0.857      | 0.919              | 0.817      | 0.962             | 0.907      | 0.902            | 0.821      |
| M06-L/SVP       | 0.962                            | 0.896      | 0.917              | 0.830      | 0.980             | 0.911      | 0.945            | 0.884      |
| M06-L/TZVP      | 0.974                            | 0.899      | 0.903              | 0.798      | 0.816             | 0.822      | 0.796            | 0.727      |
| B3LYP-D3BJ/SVP  | 0.936                            | 0.857      | 0.931              | 0.850      | 0.885             | 0.826      | 0.601            | 0.517      |
| B3LYP-D3BJ/TZVP | 0.959                            | 0.856      | 0.872              | 0.785      | 0.861             | 0.853      | 0.679            | 0.597      |
